# Supplementary material for: Potential role of Manilkara Zapota L in treating bacterial infection
Source: PeerJ. 2024 Aug 12;12:e17890. doi: 10.7717/peerj.17890 (PMC11326428; doi:10.7717/peerj.17890)
Supplement: Supplemental Information 1 [file peerj-12-17890-s001.xlsx]

## Sheet: Google Scholar 1
No	Cites	Authors	Title	Year	Source	Publisher	ArticleURL	CitesURL	GSRank	QueryDate	Type	DOI	ISSN	CitationURL	Volume	Issue	StartPage	EndPage	ECC	CitesPerYear	CitesPerAuthor	AuthorCount	Age	Abstract	FullTextURL	RelatedURL
1	3	HH Idrus	The Role of Sapodilla Fruit on Salmonella Typhi	2019		researchgate.net	https://www.researchgate.net/profile/Hasta-Idrus-2/publication/343480919_THE_ROLE_OF_SAPODILLA_FRUIT_ON_SALMONELLA_TYPHI/links/5f2c06aa92851cd302e0438d/THE-ROLE-OF-SAPODILLA-FRUIT-ON-SALMONELLA-TYPHI.pdf	https://scholar.google.com/scholar?cites=2033321046460255455&as_sdt=2005&sciodt=2007&hl=en	1	2024-07-09 11:44:40	BOOK								3	0.6	3	1	5	… of the role of manila sapodilla fruit against Salmonella typhi bacteria can be resolved properly… in intraperitoneal fluid from mice infected with Salmonella bacteria in Thy1, the same effect …	https://www.researchgate.net/profile/Hasta-Idrus-2/publication/343480919_THE_ROLE_OF_SAPODILLA_FRUIT_ON_SALMONELLA_TYPHI/links/5f2c06aa92851cd302e0438d/THE-ROLE-OF-SAPODILLA-FRUIT-ON-SALMONELLA-TYPHI.pdf	https://scholar.google.com/scholar?q=related:38yWALjONxwJ:scholar.google.com/&scioq=sapodilla+bacterial+infection&hl=en&as_sdt=2007
2	26	HH Idrus, M Hatta, A Febriza, VNA Kasim	Antibacterial activities of Sapodilla fruit extract inhibiting Salmonella typhi on mice Balb/c	2019	Int J Appl Pharm	academia.edu	https://www.academia.edu/download/71553863/20875.pdf	https://scholar.google.com/scholar?cites=9587557176692671392&as_sdt=2005&sciodt=2007&hl=en	2	2024-07-09 11:44:40	PDF								26	5.2	7	4	5	… the bacteria that can be suppressed by raw manila sapodilla … of sapodilla manila 510 mg/kgBB extract and sapodilla … fluid from mice infected with Salmonella bacteria in Thy1, the same …	https://www.academia.edu/download/71553863/20875.pdf	https://scholar.google.com/scholar?q=related:oIODhHTYDYUJ:scholar.google.com/&scioq=sapodilla+bacterial+infection&hl=en&as_sdt=2007
3	0	SH Shahraki, FM Javar, M Rahimi	… and Qualitative Phytochemical Analysis of Manilkara zapota (Sapodilla) Extract and Its Antibacterial Activity on Some Gram‐Positive and Gram‐Negative Bacteria	2023	Scientifica	Wiley Online Library	https://onlinelibrary.wiley.com/doi/abs/10.1155/2023/5967638		3	2024-07-09 11:44:40		10.1155/2023/5967638							0	0	0	3	1	… The plate with the lowest concentration of infected extract in which bacteria did not grow after a 24 hour incubation period at 37C was determined as MBC [18, 19]. The data obtained …	https://onlinelibrary.wiley.com/doi/pdf/10.1155/2023/5967638	https://scholar.google.com/scholar?q=related:Ng6ocKMhv9UJ:scholar.google.com/&scioq=sapodilla+bacterial+infection&hl=en&as_sdt=2007
4	3	CC Ying, I Kuswardinah, ...	Sapodilla (Manilkara zapota) broth as an alternative media for Candida albicans	2017	International Journal of …	journal.fk.unpad.ac.id	http://journal.fk.unpad.ac.id/index.php/ijihs/article/view/965	https://scholar.google.com/scholar?cites=12990533689203869463&as_sdt=2005&sciodt=2007&hl=en	4	2024-07-09 11:44:40									3	0.43	1	3	7	… Infection by this pathogen is usually found … bacteria. Therefore, this study was initiated to offer an alternative media to support growth of fungi. The available means of inhibiting bacterial …	https://journal.fk.unpad.ac.id/index.php/ijihs/article/viewFile/965/960	https://scholar.google.com/scholar?q=related:F8e9Q5ClR7QJ:scholar.google.com/&scioq=sapodilla+bacterial+infection&hl=en&as_sdt=2007
5	6	J Murnisyazwani, MS Rabeta	Antioxidant and antimicrobial activity of sapodilla (Manilkara zapota L.) fresh, juice and bar	2019	Food Research	myfoodresearch.com	https://www.myfoodresearch.com/uploads/8/4/8/5/84855864/fr-2018-085.pdf	https://scholar.google.com/scholar?cites=3271109017307242955&as_sdt=2005&sciodt=2007&hl=en	5	2024-07-09 11:44:40	PDF								6	1.2	3	2	5	… extract for sapodilla bar and juice exhibited stronger antibacterial activity against gram-positive bacteria. Despite … Infectious diseases are a critical problem that is primarily caused by …	https://www.myfoodresearch.com/uploads/8/4/8/5/84855864/fr-2018-085.pdf	https://scholar.google.com/scholar?q=related:y-Es9lFQZS0J:scholar.google.com/&scioq=sapodilla+bacterial+infection&hl=en&as_sdt=2007
6	0	S Priyanka, D Aakash, K Harish, B Nitin, ...	Pharmacological potential of Manilkara zapota (L.) P. Royen (Sapodilla): a narrative review	2024	Journal of Traditional …	ncbi.nlm.nih.gov	https://www.ncbi.nlm.nih.gov/pmc/articles/PMC10927406/		6	2024-07-09 11:44:40	HTML								0	0	0	5	1	… Sapodilla is brown colour berry circular and oval in shape, fruit size is about 5 to 10 cm in … zapota strengths intestine, boosts immunity and prevents bacterial infections, anaemia. (b) It is …	https://www.ncbi.nlm.nih.gov/pmc/articles/PMC10927406/	https://scholar.google.com/scholar?q=related:l_PV2zRX22kJ:scholar.google.com/&scioq=sapodilla+bacterial+infection&hl=en&as_sdt=2007
7	0	HH Idrus, A Febriza, VN Kasim, S As'ad	Achras Zapota L Extract Reduces Levels of Soluble Tumor Necrosis Alpha (TNF-α) of Salmonella Typhi		researchgate.net		https://www.researchgate.net/profile/Yusriani-Mangarengi/publication/343112083_Conference_Book_Achras_Zapota_L_Extract_Reduces_Levels_of_Soluble_Tumor_Necrosis_Alpha_TNF-_of_Salmonella_Typhi/links/5fcf0f3a299bf188d4001b1b/Conference-Book-Achras-Zapota-L-Extract-Reduces-Levels-of-Soluble-Tumor-Necrosis-Alpha-TNF-of-Salmonella-Typhi.pdf		7	2024-07-09 11:44:40	PDF								0	0	0	4		… that after administration of sapodilla manila fruit extract dose … TNF-α concentration in mice infected with Salmonella typhi by … of bacteria that cause infection, it will also directly control the …	https://www.researchgate.net/profile/Yusriani-Mangarengi/publication/343112083_Conference_Book_Achras_Zapota_L_Extract_Reduces_Levels_of_Soluble_Tumor_Necrosis_Alpha_TNF-_of_Salmonella_Typhi/links/5fcf0f3a299bf188d4001b1b/Conference-Book-Achras-Zapota-L-Extract-Reduces-Levels-of-Soluble-Tumor-Necrosis-Alpha-TNF-of-Salmonella-Typhi.pdf	https://scholar.google.com/scholar?q=related:hXejW-4jFkEJ:scholar.google.com/&scioq=sapodilla+bacterial+infection&hl=en&as_sdt=2007
8	0	H Handayani Idrus, A Febriza, ...	Achras Zapota L Extract Reduces Levels of Soluble Tumor Necrosis Alpha (TNF-a) in Salmonella typhi Infected Animals	2022	International Journal of …	jobiost.com	https://www.jobiost.com/article_154891.html		8	2024-07-09 11:44:40									0	0	0	3	2	… host defense for bacterial, viral and parasitic infections. TNF-… that after administration of sapodilla manila fruit extract dose … TNF-α concentration in mice infected with Salmonella typhi by …	https://www.jobiost.com/article_154891_3db1d6d1106f4552e67c22b68c4beec3.pdf	https://scholar.google.com/scholar?q=related:NzsalrJAl-kJ:scholar.google.com/&scioq=sapodilla+bacterial+infection&hl=en&as_sdt=2007
9	43	M Bano, B Ahmed	Manilkara zapota (L.) P. Royen (Sapodilla): a review	2017	… Journal of Advance Research, Ideas and …	academia.edu	https://www.academia.edu/download/55442413/Manilkara_zapota_L._P.Royen_Sapodilla_A_Review.pdf	https://scholar.google.com/scholar?cites=3533705994453019867&as_sdt=2005&sciodt=2007&hl=en	9	2024-07-09 11:44:40	PDF								43	6.14	22	2	7	… sapodilla leaves for cytotoxic, antioxidant, antimicrobial and mild CNS depressant activities which could be used for therapeutic actions against cancer, tumor, infectious … these bacterial …	https://www.academia.edu/download/55442413/Manilkara_zapota_L._P.Royen_Sapodilla_A_Review.pdf	https://scholar.google.com/scholar?q=related:22wKLOE-CjEJ:scholar.google.com/&scioq=sapodilla+bacterial+infection&hl=en&as_sdt=2007
10	2	GL Utama, M Nabila, HR Arifin, E Lembong, ...	Antibacterial Activity Test of Indigenous Yeast from Sapodilla Fruit against Staphylococcus aureus and Escherichia coli	2020	Microbiology …	academia.edu	https://www.academia.edu/download/67057672/661.pdf	https://scholar.google.com/scholar?cites=1937358039976088094&as_sdt=2005&sciodt=2007&hl=en	10	2024-07-09 11:44:40	PDF								2	0.5	0	5	4	… sapodilla fruit has yeast which can inhibit the activity of S. aureus and E. coli bacteria like antibacterial activity of sapodilla … of indigenous sapodilla fruit, 1 yeast isolate from sapodilla fruit …	https://www.academia.edu/download/67057672/661.pdf	https://scholar.google.com/scholar?q=related:HpKFb9_g4hoJ:scholar.google.com/&scioq=sapodilla+bacterial+infection&hl=en&as_sdt=2007
11	2	GL Utama, M Nabila, HR Arifin, E Lembong, ...	Antibacterial Activity Test of Indigenous Yeast from Sapodilla Fruit against Staphylococcus aureus and Escherichia coli	2020	Microbiology …	academia.edu	https://www.academia.edu/download/67057672/661.pdf	https://scholar.google.com/scholar?cites=1937358039976088094&as_sdt=2005&sciodt=2007&hl=en	11	2024-07-09 11:44:40	PDF								2	0.5	0	5	4	… sapodilla fruit has yeast which can inhibit the activity of S. aureus and E. coli bacteria like antibacterial activity of sapodilla … of indigenous sapodilla fruit, 1 yeast isolate from sapodilla fruit …	https://www.academia.edu/download/67057672/661.pdf	https://scholar.google.com/scholar?q=related:HpKFb9_g4hoJ:scholar.google.com/&scioq=sapodila+bacterial+infection&hl=en&as_sdt=2007
12	43	M Bano, B Ahmed	Manilkara zapota (L.) P. Royen (Sapodilla): a review	2017	… Journal of Advance Research, Ideas and …	academia.edu	https://www.academia.edu/download/55442413/Manilkara_zapota_L._P.Royen_Sapodilla_A_Review.pdf	https://scholar.google.com/scholar?cites=3533705994453019867&as_sdt=2005&sciodt=2007&hl=en	12	2024-07-09 11:44:40	PDF								43	6.14	22	2	7	… of sapodilla are … sapodilla leaves for cytotoxic, antioxidant, antimicrobial and mild CNS depressant activities which could be used for therapeutic actions against cancer, tumor, infectious …	https://www.academia.edu/download/55442413/Manilkara_zapota_L._P.Royen_Sapodilla_A_Review.pdf	https://scholar.google.com/scholar?q=related:22wKLOE-CjEJ:scholar.google.com/&scioq=sapodila+bacterial+infection&hl=en&as_sdt=2007
13	0	A Nurdin, M Marlinda, ...	TESTING THE INHIBITION OF SAWO PUTIK EXTRACT AGAINST ESCHERIA COLI (E. COLI) BACTERIA	2023	… JOURNAL ON ADVANCED …	ojs.transpublika.com	http://ojs.transpublika.com/index.php/IJATEIS/article/view/1098		13	2024-07-09 11:44:40									0	0	0	3	1	… the inhibitory effects of sapodilla leaf extract on the growth of Escherichia coli bacteria. The … A healthy gut microbiota has a role in fighting infection with pathogenic bacteria such as …	http://ojs.transpublika.com/index.php/IJATEIS/article/download/1098/986	https://scholar.google.com/scholar?q=related:_COwZjDHk9YJ:scholar.google.com/&scioq=sapodila+bacterial+infection&hl=en&as_sdt=2007
14	0	DPP Joshi, DHB Kumbhar, DVA Chaudhari	DYNAMIC FORMULATION OF MOUTH ULCER GEL BY USING SAPODILLA LEAF EXTRACT	2022	International Journal Of All …	ijciras.com	http://www.ijciras.com/Users/ManuScript/ManuScriptDetails/81864536-25c6-47df-88b2-8d1aa04cf6c5		14	2024-07-09 11:44:40									0	0	0	3	2	… causes are found by research to incorporate bacterial infection (Helicobacter pylori) or reaction … The Gramnegative bacterium Helicobacter pylori remains present between the mucous …	http://www.ijciras.com/PublishedPaper/IJCIRAS1877.pdf	https://scholar.google.com/scholar?q=related:srYWcn1LNukJ:scholar.google.com/&scioq=sapodila+bacterial+infection&hl=en&as_sdt=2007
15	3	J Miranda	Nutrition and Pharmacological Effects of Manilkara zapota	2022	Journal of Innovation and Social Science Research …	scholar.archive.org	https://scholar.archive.org/work/zvxeqbehhraelhxqkxmkg5pdgy/access/wayback/http://jissr.net/api/static/2022-9-7_3	https://scholar.google.com/scholar?cites=2328196046602351075&as_sdt=2005&sciodt=2007&hl=en	15	2024-07-09 11:44:40	PDF								3	1.5	3	1	2	… Sapodilla fruit is a good source of minerals like-potassium, copper, … So that sapodilla (chikoo) has several wonderful health … Also prevents various bacterial infections due to prominent …	https://scholar.archive.org/work/zvxeqbehhraelhxqkxmkg5pdgy/access/wayback/http://jissr.net/api/static/2022-9-7_3	https://scholar.google.com/scholar?q=related:47EzFfhpTyAJ:scholar.google.com/&scioq=sapodila+bacterial+infection&hl=en&as_sdt=2007
16	0	HH Idrus, M Hatta, V Hadju, S As'ad, V Novarina, ...	Achras Zapota L Reduce Expression Of mRNA High Motility Group Box 1 (HMGB1)		researchgate.net		https://www.researchgate.net/profile/Hasta-Idrus-2/publication/339838503_Achras_Zapota_L_Reduce_Expression_Of_mRNA_High_Motility_Group_Box_1_HMGB1/links/5eb4062492851cbf7fae5272/Achras-Zapota-L-Reduce-Expression-Of-mRNA-High-Motility-Group-Box-1-HMGB1.pdf		16	2024-07-09 11:44:40	PDF								0	0	0	6		… manila sapodilla fruit which can suppress bacterial growth thereby reducing the number of bacteria … manila fruit extract 750 mg / kgBW after Salmonella typhi infection by intraperitonium …	https://www.researchgate.net/profile/Hasta-Idrus-2/publication/339838503_Achras_Zapota_L_Reduce_Expression_Of_mRNA_High_Motility_Group_Box_1_HMGB1/links/5eb4062492851cbf7fae5272/Achras-Zapota-L-Reduce-Expression-Of-mRNA-High-Motility-Group-Box-1-HMGB1.pdf	https://scholar.google.com/scholar?q=related:KQ0x8nDEJVsJ:scholar.google.com/&scioq=sapodila+bacterial+infection&hl=en&as_sdt=2007
17	4	D Padmavathi	A study on nutritional and health importance of “Sapotas”	2018	International Journal of Food Science and Nutrition	academia.edu	https://www.academia.edu/download/58201430/3-4-63-184.pdf	https://scholar.google.com/scholar?cites=7841703174346360179&as_sdt=2005&sciodt=2007&hl=en	17	2024-07-09 11:44:40	PDF								4	0.67	4	1	6	… Sapodilla is a dull looking fruit but with potent antiviral, … The antioxidants prevent bacteria from entering into the human body. Vitamin … body resistance against many infectious diseases. …	https://www.academia.edu/download/58201430/3-4-63-184.pdf	https://scholar.google.com/scholar?q=related:c8X3bH1T02wJ:scholar.google.com/&scioq=sapodila+bacterial+infection&hl=en&as_sdt=2007
18	32	UN Bhale, PM Wagh, ...	Antagonistic confrontation of Trichoderma spp against fruit rot pathogens on Sapodilla (Manilkara zapota L.)	2013	Journal of Yeast and …	academicjournals.org	https://academicjournals.org/article/article1380022374_Bhale%20et%20al.pdf	https://scholar.google.com/scholar?cites=16106607131914611853&as_sdt=2005&sciodt=2007&hl=en	18	2024-07-09 11:44:40	PDF								32	2.91	11	3	11	Trichoderma koningii, Trichoderma pseudokoningii and Trichoderma virens were tested against fruit rots pathogens of sapodilla (Manilkara zapota L.) under laboratory conditions. Dual …	https://academicjournals.org/article/article1380022374_Bhale%20et%20al.pdf	https://scholar.google.com/scholar?q=related:jSyLmtkpht8J:scholar.google.com/&scioq=sapodila+bacterial+infection&hl=en&as_sdt=2007
19	0	A Trisnawati, S Wahyuningsih, ...	The Determination of Tannin Content and Larvicidal Activity Test Of Ripe Sapodilla Fruit Peel (Manilkara zapota)	2023	International Journal of …	jurnal.itscience.org	https://jurnal.itscience.org/index.php/ijmdsa/article/view/2062		19	2024-07-09 11:44:40									0	0	0	3	1	… aimed to determine the tannin content in ripe sapodilla peel (Manilkara zapota) by UV-Vis spectrophotometry and to determine the activity of sapodilla peel as a larvicide against Aedes …	https://jurnal.itscience.org/index.php/ijmdsa/article/download/2062/1535	https://scholar.google.com/scholar?q=related:WgvTtrSBI_0J:scholar.google.com/&scioq=sapodila+bacterial+infection&hl=en&as_sdt=2007
20	0	S Gam, R Ahmed, B Kashyap, H Sarma, ...	A Systematic Review on Traditional Use, Phytochemistry and Pharmacological Activities of Manilkara Zapota	2024	Pharmacological …	Elsevier	https://www.sciencedirect.com/science/article/pii/S2950199724000508		20	2024-07-09 11:44:40									0	0	0	5	1	… India is the largest producer of sapodilla globally, where it is commonly referred … sapodilla juice and bars exhibited heightened antibacterial effectiveness against gram-positive bacteria…		https://scholar.google.com/scholar?q=related:cPd0wgYDTb8J:scholar.google.com/&scioq=sapodila+bacterial+infection&hl=en&as_sdt=2007
21	12	WS Lim, MS Rabeta, U Uthumporn	Development of functional beverage from Sapodilla (Manilkara zapota L.) fruit	2018	Food Res	researchgate.net	https://www.researchgate.net/profile/Rabeta-Mohd-Salleh/publication/321017502_Development_of_functional_beverage_from_Sapodilla_Manilkara_Zapota_L_fruit/links/5a1d5474458515373189865e/Development-of-functional-beverage-from-Sapodilla-Manilkara-Zapota-L-fruit.pdf	https://scholar.google.com/scholar?cites=2034886461608606975&as_sdt=2005&sciodt=2007&hl=en	21	2024-07-09 11:44:40	PDF								12	2	4	3	6	… sapodilla (Manilkara zapota L.) fruit. Among three formulations, sapodilla juice with the combination of 50% pure sapodilla … the pure sapodilla juice and formulated sapodilla juice tested …	https://www.researchgate.net/profile/Rabeta-Mohd-Salleh/publication/321017502_Development_of_functional_beverage_from_Sapodilla_Manilkara_Zapota_L_fruit/links/5a1d5474458515373189865e/Development-of-functional-beverage-from-Sapodilla-Manilkara-Zapota-L-fruit.pdf	https://scholar.google.com/scholar?q=related:_7xunnRePRwJ:scholar.google.com/&scioq=sapodila+bacterial+infection&hl=en&as_sdt=2007
22	1	PM Wagh, UN Bhale	Potentials of nutritional factors on production of cellulose enzyme by post-harvest fungal pathogens on sapodilla fruit.	2014		researchgate.net	https://www.researchgate.net/profile/Udhav-Bhale/publication/312495631_Potentials_of_nutritional_factors_on_production_of_cellulose_enzyme_by_Post-Harvest_Fungal_Pathogens_on_Sapodilla_fruit/links/587f2eb508ae4445c06fdd7f/Potentials-of-nutritional-factors-on-production-of-cellulose-enzyme-by-Post-Harvest-Fungal-Pathogens-on-Sapodilla-fruit.pdf	https://scholar.google.com/scholar?cites=18385963363204457731&as_sdt=2005&sciodt=2007&hl=en	22	2024-07-09 11:44:40	PDF								1	0.1	1	2	10	… in this study which was isolated from postharvest infected sapodilla fruit. Statistical analyses … of aerobic, facultative aerobic, anaerobic bacteria and fungi. The characters are restricted to …	https://www.researchgate.net/profile/Udhav-Bhale/publication/312495631_Potentials_of_nutritional_factors_on_production_of_cellulose_enzyme_by_Post-Harvest_Fungal_Pathogens_on_Sapodilla_fruit/links/587f2eb508ae4445c06fdd7f/Potentials-of-nutritional-factors-on-production-of-cellulose-enzyme-by-Post-Harvest-Fungal-Pathogens-on-Sapodilla-fruit.pdf	https://scholar.google.com/scholar?q=related:A-UlDUQQKP8J:scholar.google.com/&scioq=sapodila+bacterial+infection&hl=en&as_sdt=2007
23	0	OA Anugom	Immune System Reinforcement With Sapodilla		my.klarity.health		https://my.klarity.health/immune-system-reinforcement-with-sapodilla/		23	2024-07-09 11:44:40	HTML								0	0	0	1		… They are called microorganisms, and some examples are bacteria, viruses, and fungi. Some of … infected cells. This seems to affect how long a respiratory illness last and how severe it is. …	https://my.klarity.health/immune-system-reinforcement-with-sapodilla/	https://scholar.google.com/scholar?q=related:jQ6J45r98rUJ:scholar.google.com/&scioq=sapodila+bacterial+infection&hl=en&as_sdt=2007
24	0	CT Gowda, K Rajagopal	Sapodilla rTLP exists as a monomer, dimer with β-1, 3-glucanase and antifungal activity	2023	bioRxiv	biorxiv.org	https://www.biorxiv.org/content/10.1101/2023.03.22.533889.abstract		24	2024-07-09 11:44:40		10.1101/2023.03.22.533889.abstract							0	0	0	2	1	… the Sapodilla TLP protein. The protein yield obtained with this process before dialysis was found to be∼12 mg/L of bacterial culture… Commonly, Sapodilla fruits are infected by the fungal …	https://www.biorxiv.org/content/biorxiv/early/2023/03/23/2023.03.22.533889.full.pdf	https://scholar.google.com/scholar?q=related:DneM79EcGLsJ:scholar.google.com/&scioq=sapodila+bacterial+infection&hl=en&as_sdt=2007
25	1	KR Abdraboh, NAM Arfa	Chemical and Technological Studies on Sapote Sapodilla (Manilkara zapota) and White Sapote (Casimiroa edulis) Products	2024	Food Technology Research Journal	journals.ekb.eg	https://journals.ekb.eg/article_343107.html	https://scholar.google.com/scholar?cites=361300251994815132&as_sdt=2005&sciodt=2007&hl=en	25	2024-07-09 11:44:40									1	1	1	2	1	This study intended to evaluate the physical and chemical properties of two sapota fruit cultivars namely: sapodilla (Manilkara zapota) and white sapote (Casimiroa edulis). The …	https://journals.ekb.eg/article_343107_4f4b69f3fa192c3cff9bf36d80016882.pdf	https://scholar.google.com/scholar?q=related:nPpoOaqYAwUJ:scholar.google.com/&scioq=sapodila+bacterial+infection&hl=en&as_sdt=2007
26	0	A Vaishnav, FT Mehta, P Patani	Anti-Inflammatory and Anti-Oxidant effects of Manilkara zapota and Hylocereus undantus: A Complete Review.	2024	Journal of Advanced …	search.ebscohost.com	https://search.ebscohost.com/login.aspx?direct=true&profile=ehost&scope=site&authtype=crawler&jrnl=02537214&AN=175541327&h=Uk8XF3rtKhQrn6f%2BehO16QlDXrrd40xkr8XHZokvDMqrVwFyYSffe0JQ8iAAHMjCJmmafYUCunfy4erCSZz8sA%3D%3D&crl=c		26	2024-07-09 11:44:40									0	0	0	3	1	… ,Sapodilla) and Hylocereus undatus (ie, Dragon fruit). The Central American native sapodilla has … When higher organisms are exposed to harmful assaults like microbial infection, tissue …		https://scholar.google.com/scholar?q=related:oumPu0fMc0sJ:scholar.google.com/&scioq=sapodila+bacterial+infection&hl=en&as_sdt=2007
27	23	S Bhargavi, B Kanakaiah, DK Sowmya, ...	An evaluation of the antibacterial activity of root extracts of Manilkara Zapota against Staphylococcus Aureus and Escherichia Coli	2013	International Journal …	researchgate.net	https://www.researchgate.net/profile/Sreekanth-Nama-Dr/publication/272510659_AN_EVALUATION_OF_THE_ANTIBACTERIAL_ACTIVITY_OF_ROOT_EXTRACTS_OF_MANILKARA_ZAPOTA_AGAINST_STAPHYLOCOCCUS_AUREUS_AND_ESCHERICHIA_COLI/links/54e860750cf2f7aa4d517bef/AN-EVALUATION-OF-THE-ANTIBACTERIAL-ACTIVITY-OF-ROOT-EXTRACTS-OF-MANILKARA-ZAPOTA-AGAINST-STAPHYLOCOCCUS-AUREUS-AND-ESCHERICHIA-COLI.pdf	https://scholar.google.com/scholar?cites=7192107929789664984&as_sdt=2005&sciodt=2007&hl=en	27	2024-07-09 11:44:40	PDF								23	2.09	6	4	11	… plant can be used as a source of oral drugs to fight infections against susceptible bacteria. … Sapodilla can grow to more than 30 m (98 ft) tall with an average trunk diameter of 1.5 m (4.9 ft…	https://www.researchgate.net/profile/Sreekanth-Nama-Dr/publication/272510659_AN_EVALUATION_OF_THE_ANTIBACTERIAL_ACTIVITY_OF_ROOT_EXTRACTS_OF_MANILKARA_ZAPOTA_AGAINST_STAPHYLOCOCCUS_AUREUS_AND_ESCHERICHIA_COLI/links/54e860750cf2f7aa4d517bef/AN-EVALUATION-OF-THE-ANTIBACTERIAL-ACTIVITY-OF-ROOT-EXTRACTS-OF-MANILKARA-ZAPOTA-AGAINST-STAPHYLOCOCCUS-AUREUS-AND-ESCHERICHIA-COLI.pdf	https://scholar.google.com/scholar?q=related:2A5ihQ6Az2MJ:scholar.google.com/&scioq=sapodila+bacterial+infection&hl=en&as_sdt=2007
28	24	SY Foo, ZA Nur Hanani, A Rozzamri, ...	Effect of Chitosan–Beeswax Edible Coatings on the Shelf-life of Sapodilla (Achras zapota) Fruit	2019	Journal of Packaging …	Springer	https://link.springer.com/article/10.1007/s41783-018-0047-0	https://scholar.google.com/scholar?cites=8433840443577872016&as_sdt=2005&sciodt=2007&hl=en	28	2024-07-09 11:44:40		10.1007/s41783-018-0047-0							24	4.8	6	4	5	… Beeswax prevents moisture permeation which greatly induced bacterial and fungal infection [32]. As for chitosan, it exhibited antimicrobial properties due to the interaction between the …	https://www.researchgate.net/profile/Mr-Ismail-Fitry-2/publication/329404268_Effect_of_Chitosan-Beeswax_Edible_Coatings_on_the_Shelf-life_of_Sapodilla_Achras_zapota_Fruit/links/5c2d66b0458515a4c7086cca/Effect-of-Chitosan-Beeswax-Edible-Coatings-on-the-Shelf-life-of-Sapodilla-Achras-zapota-Fruit.pdf?origin=journalDetail&_tp=eyJwYWdlIjoiam91cm5hbERldGFpbCJ9	https://scholar.google.com/scholar?q=related:kC7I8zIFC3UJ:scholar.google.com/&scioq=sapodila+bacterial+infection&hl=en&as_sdt=2007
29	18	ST Alrashood, AK Al-Asmari, AK Alotaibi, ...	Protective effect of lyophilized sapodilla (Manilkara zapota) fruit extract against CCl4-induced liver damage in rats	2020	Saudi Journal of …	Elsevier	https://www.sciencedirect.com/science/article/pii/S1319562X20301790	https://scholar.google.com/scholar?cites=12273342366035734223&as_sdt=2005&sciodt=2007&hl=en	29	2024-07-09 11:44:40	HTML								18	4.5	5	4	4	… , sapodilla has been shown to exhibit anti-bacterial, anti-… to elucidate the effect of lyophilized sapodilla extract (LSE) treatment in … by alcohol consumption, viral infections and a myriad of …	https://www.sciencedirect.com/science/article/pii/S1319562X20301790	https://scholar.google.com/scholar?q=related:z-5P3tqrU6oJ:scholar.google.com/&scioq=sapodila+bacterial+infection&hl=en&as_sdt=2007
30	9	M Baskar, G Hemalatha, ...	Traditional and medicinal importance of sapota–Review	2020	International Journal of …	researchgate.net	https://www.researchgate.net/profile/Hemalatha-Ganapathyswamy/publication/339790359_Traditional_and_Medicinal_Importance_of_Sapota_-_Review/links/6479c17e2cad460a1bee0c46/Traditional-and-Medicinal-Importance-of-Sapota-Review.pdf	https://scholar.google.com/scholar?cites=9245506263630593670&as_sdt=2005&sciodt=2007&hl=en	30	2024-07-09 11:44:40	PDF								9	2.25	3	3	4	… from many bacterial infections due to presence of VitaminC. … The fruit and crushed seed of sapodilla are used in prevent in … The wood Form the sapodilla tree is dark red, hard, heavy …	https://www.researchgate.net/profile/Hemalatha-Ganapathyswamy/publication/339790359_Traditional_and_Medicinal_Importance_of_Sapota_-_Review/links/6479c17e2cad460a1bee0c46/Traditional-and-Medicinal-Importance-of-Sapota-Review.pdf	https://scholar.google.com/scholar?q=related:hr5ZRPaiToAJ:scholar.google.com/&scioq=sapodila+bacterial+infection&hl=en&as_sdt=2007
31	22	KL Chadha	Strategy for optimisation of productivity and utilization of sapota (Manilkara achras (Mill.) forberg.)	1992	Indian Journal of Horticulture	indianjournals.com	https://www.indianjournals.com/ijor.aspx?target=ijor:ijh&volume=49&issue=1&article=001&type=pdf	https://scholar.google.com/scholar?cites=6087424772704963221&as_sdt=2005&sciodt=2007&hl=en	31	2024-07-09 11:44:40									22	0.69	22	1	32	Sapota or sapodilla (Manilkara achras (Mill.) Forberg) synonym Achras zapota L.), is commonly known as chiku in India. It is native of tropical America and is believed to have originated …		https://scholar.google.com/scholar?q=related:lQr-BZTgelQJ:scholar.google.com/&scioq=sapodila+bacterial+infection&hl=en&as_sdt=2007
32	1	SV Singh, R Singh, A Singh, MG Kamble	SAPODILLA (Manikara achras L.) FRUITS: PROCESSING and PRESERVATION FOR VALUE ADDITION		researchgate.net		https://www.researchgate.net/profile/Sukhveer-Singh-6/publication/352172623_SAPODILLA_Manikara_achras_L_FRUITS_PROCESSING_and_PRESERVATION_FOR_VALUE_ADDITION/links/60bd030492851cb13d83da77/SAPODILLA-Manikara-achras-L-FRUITS-PROCESSING-and-PRESERVATION-FOR-VALUE-ADDITION.pdf	https://scholar.google.com/scholar?cites=5459944067575686483&as_sdt=2005&sciodt=2007&hl=en	32	2024-07-09 11:44:40	PDF								1	0	0	4		… The people of India use it for antibacterial and anti-viral properties. It maintains the overall … fruits are most susceptible to foster microbial infection of few species such as, Pestalotiopsis, …	https://www.researchgate.net/profile/Sukhveer-Singh-6/publication/352172623_SAPODILLA_Manikara_achras_L_FRUITS_PROCESSING_and_PRESERVATION_FOR_VALUE_ADDITION/links/60bd030492851cb13d83da77/SAPODILLA-Manikara-achras-L-FRUITS-PROCESSING-and-PRESERVATION-FOR-VALUE-ADDITION.pdf	https://scholar.google.com/scholar?q=related:U6VZkTOexUsJ:scholar.google.com/&scioq=sapodila+bacterial+infection&hl=en&as_sdt=2007
33	0	SB Alamgir, A Khatun, RS Nijhu	A REVIEW ON THE TRADITIONAL USES, PHYTOCHEMISTRY AND PHARMACOLOGY OF MANILKARA ZAPOTA LINN.	2024		researchgate.net	https://www.researchgate.net/profile/Ambia-Khatun-2/publication/380528573_A_REVIEW_ON_THE_TRADITIONAL_USES_PHYTOCHEMISTRY_AND_PHARMACOLOGY_OF_MANILKARA_ZAPOTA_LINN/links/6640d15435243041539db395/A-REVIEW-ON-THE-TRADITIONAL-USES-PHYTOCHEMISTRY-AND-PHARMACOLOGY-OF-MANILKARA-ZAPOTA-LINN.pdf		33	2024-07-09 11:44:40	PDF								0	0	0	3	1	… is frequently referred to as "sapodilla." It is used extensively … activity against a variety of pathogenic bacteria and fungi. The … all of the pathogenic bacteria employed in this investigation, …	https://www.researchgate.net/profile/Ambia-Khatun-2/publication/380528573_A_REVIEW_ON_THE_TRADITIONAL_USES_PHYTOCHEMISTRY_AND_PHARMACOLOGY_OF_MANILKARA_ZAPOTA_LINN/links/6640d15435243041539db395/A-REVIEW-ON-THE-TRADITIONAL-USES-PHYTOCHEMISTRY-AND-PHARMACOLOGY-OF-MANILKARA-ZAPOTA-LINN.pdf	https://scholar.google.com/scholar?q=related:g0aGhrF9jZQJ:scholar.google.com/&scioq=sapodila+bacterial+infection&hl=en&as_sdt=2007
34	34	MR Islam, MS Parvin, MR Banu, N Jahan, N Das, ...	Antibacterial and phytochemical screening of ethanol extracts of Manilkara zapota leaves and bark	2013	Int J Pharma …	researchgate.net	https://www.researchgate.net/profile/Rikta-Banu-2/publication/381042223_Antibacterial_and_phytochemical_screening_of_ethanol_extracts_of_Manilkara_zapota_leaves_and_bark/links/665a962a479366623a35f68b/Antibacterial-and-phytochemical-screening-of-ethanol-extracts-of-Manilkara-zapota-leaves-and-bark.pdf	https://scholar.google.com/scholar?cites=3249605396933526921&as_sdt=2005&sciodt=2007&hl=en	34	2024-07-09 11:44:40	PDF								34	3.09	6	6	11	… drugs, their effectiveness in treating common bacterial infections is diminishing, resulting in … known as Sapodilla or Sofeda belongs to the family Sapotaceae. The sapodilla is a fairly …	https://www.researchgate.net/profile/Rikta-Banu-2/publication/381042223_Antibacterial_and_phytochemical_screening_of_ethanol_extracts_of_Manilkara_zapota_leaves_and_bark/links/665a962a479366623a35f68b/Antibacterial-and-phytochemical-screening-of-ethanol-extracts-of-Manilkara-zapota-leaves-and-bark.pdf	https://scholar.google.com/scholar?q=related:iUVqMOTqGC0J:scholar.google.com/&scioq=sapodila+bacterial+infection&hl=en&as_sdt=2007
35	0	NH Espíndola-Rodríguez, N Muñoz-Cázares, ...	Antivirulence and antipathogenic activity of Mayan herbal remedies against Pseudomonas aeruginosa	2024	Journal of …	Elsevier	https://www.sciencedirect.com/science/article/pii/S037887412400672X		35	2024-07-09 11:44:40									0	0	0	3	1	… aeruginosa infection. Antivirulence properties were determined by inhibiting phenotypes … of the animals, reduced establishment of the bacteria in the burn and prevented its systemic …		https://scholar.google.com/scholar?q=related:EHj4gAd-YRAJ:scholar.google.com/&scioq=sapodila+bacterial+infection&hl=en&as_sdt=2007
36	1	SP Bawankule	Role of Vitamin-C and Vitamin-D as an Immunomodulatory Dietary Source in Prevention of Infectious Disease Such as Covid-19	2021	Annals of the Romanian Society for Cell Biology	annalsofrscb.ro	http://annalsofrscb.ro/index.php/journal/article/view/3307	https://scholar.google.com/scholar?cites=12203652950576922865&as_sdt=2005&sciodt=2007&hl=en	36	2024-07-09 11:44:40									1	0.33	1	1	3	… Smoking and tobacco chewing permit the growth of various bacterial and viral infections [35,… by preventing systemic infections and treating respiratory infections. Sapodilla is the best …	http://annalsofrscb.ro/index.php/journal/article/download/3307/2734	https://scholar.google.com/scholar?q=related:8QBJabMVXKkJ:scholar.google.com/&scioq=sapodila+bacterial+infection&hl=en&as_sdt=2007
37	2	P Rai	Fruit's and vegetable's peels: antimicrobial activity	2019	World J. Pharm. Res	wjpr.s3.ap-south-1.amazonaws.com	https://wjpr.s3.ap-south-1.amazonaws.com/article_issue/1556622181.pdf	https://scholar.google.com/scholar?cites=11152538180009043619&as_sdt=2005&sciodt=2007&hl=en	37	2024-07-09 11:44:40	PDF								2	0.4	2	1	5	… known to causes antibiotic resistant infections. We performed the … gram negative bacteria, gram positive bacteria and fungi. The … on beetroot and sapodilla, antifungal activity on papaya. …	https://wjpr.s3.ap-south-1.amazonaws.com/article_issue/1556622181.pdf	https://scholar.google.com/scholar?q=related:o6Zr02LGxZoJ:scholar.google.com/&scioq=sapodila+bacterial+infection&hl=en&as_sdt=2007
38	1	N Chaichanawongsaroj, P Pattiyathanee	Effect of Thai fruit mesocarp extracts on growth of Helicobacter pylori and their anti-adhesion activities to HEp-2 cells	2014	J. Chem. Pharm. Res	academia.edu	https://www.academia.edu/download/105473451/effect-of-thai-fruit-mesocarp-extracts-on-growth-of-helicobacter-pylori-and-their-antiadhesion-activities-to-hep2-cells.pdf	https://scholar.google.com/scholar?cites=12686691539699293509&as_sdt=2005&sciodt=2007&hl=en	38	2024-07-09 11:44:40	PDF								1	0.1	1	2	10	… of most pathogenic bacteria including Helicobacter pylori, which … extracts of mangosteen, mango, sapodilla, rose apple and both … pylori infection starts from the adhesion of bacteria to …	https://www.academia.edu/download/105473451/effect-of-thai-fruit-mesocarp-extracts-on-growth-of-helicobacter-pylori-and-their-antiadhesion-activities-to-hep2-cells.pdf	https://scholar.google.com/scholar?q=related:Rd26Br0uELAJ:scholar.google.com/&scioq=sapodila+bacterial+infection&hl=en&as_sdt=2007
39	3	GP Rao, Madhupriya, S Mitra, JM Johnson, ...	Genetic diversity of phytoplasma strains inducing phyllody, flat stem and witches' broom symptoms in Manilkara zapota in India	2020	… and Molecular Biology …	Springer	https://link.springer.com/article/10.1007/s12298-020-00854-7	https://scholar.google.com/scholar?cites=634930482716227198&as_sdt=2005&sciodt=2007&hl=en	39	2024-07-09 11:44:40		10.1007/s12298-020-00854-7							3	0.75	1	5	4	… infected mother stalks during grafting or planting young seedlings with latent infection of … They may transmit phytoplasma from their herbaceous hosts to the sapodilla trees which is …	https://www.ncbi.nlm.nih.gov/pmc/articles/PMC7415051/	https://scholar.google.com/scholar?q=related:fjZe9-i5zwgJ:scholar.google.com/&scioq=sapodila+bacterial+infection&hl=en&as_sdt=2007
40	3	I Maesaroh, D Pratiwi, L Agustin	Ointment Formulation and Test Preparation from Manilkara zapota L. Leaf Extract Using Variation of Ointment Base as Boils	2020	Indonesian Journal of …	academia.edu	https://www.academia.edu/download/99754281/pdf.pdf	https://scholar.google.com/scholar?cites=15531278348586972652&as_sdt=2005&sciodt=2007&hl=en	40	2024-07-09 11:44:40	PDF								3	0.75	1	3	4	… on potency test of 50%, where the bacteria are the cause of boils. Some of … Boils is an infectious disease caused by the … the sapodilla manila leaf extract and crushed until homogeneous. …	https://www.academia.edu/download/99754281/pdf.pdf	https://scholar.google.com/scholar?q=related:7PU9q14vitcJ:scholar.google.com/&scioq=sapodila+bacterial+infection&hl=en&as_sdt=2007
41	16	TS Freitas, FF Campina, MS Costa, ...	UPLC-QTOF-MS/MS analysis and antibacterial activity of the Manilkara zapota (L.) P. Royen against Escherichia coli and other MDR bacteria	2021	Cellular and Molecular …	cellmolbiol.org	http://cellmolbiol.org/index.php/CMB/article/view/3949	https://scholar.google.com/scholar?cites=8017279117784527676&as_sdt=2005&sciodt=2007&hl=en	41	2024-07-09 11:44:40									16	5.33	4	4	3	… presented antibacterial effects against bacteria representative of … in vitro against strains that promote infections in the oral mu… and antimicrobial activity of sapodilla (Manilkara zapota L.) …	https://cellmolbiol.org/index.php/CMB/article/download/3949/1778	https://scholar.google.com/scholar?q=related:PDO0WOEYQ28J:scholar.google.com/&scioq=sapodila+bacterial+infection&hl=en&as_sdt=2007
42	0	DCK Sohounhloué, ...	Formulation of a Flavored Drink Based on Sapodilla Puree, Pineapple Juice and Lemongrass Essential Oil	2022	International …	classical.goforpromo.com	http://classical.goforpromo.com/id/eprint/1856/		42	2024-07-09 11:44:40									0	0	0	2	2	… The total bacteria were counted by inoculation on the Plate Count Agar (PCA) medium and … also contains good levels of vitamin A beneficial to vision, and vitamin C to resist infections. …	http://classical.goforpromo.com/id/eprint/1856/1/785-Article%20Text-1513-1-10-20221117.pdf	https://scholar.google.com/scholar?q=related:RoEZwj8BkQ8J:scholar.google.com/&scioq=sapodila+bacterial+infection&hl=en&as_sdt=2007
43	1	AP Rahayu, TDA Tugon	Herbal Medicines in Treating Typhoid Fever: Correlation of Information in Indonesia News Portals and Research Results	2021	1st Paris Van Java International …	atlantis-press.com	https://www.atlantis-press.com/proceedings/pvj-ishessh-20/125953717	https://scholar.google.com/scholar?cites=14282787712563340272&as_sdt=2005&sciodt=2007&hl=en	43	2024-07-09 11:44:40									1	0.33	1	2	3	… This disease is caused by a species of pathogenic bacteria called … This disease is an infectious disease mainly caused by … These herbs include sapodilla manila, Gatal leaves, Kenikir …	https://www.atlantis-press.com/article/125953717.pdf	https://scholar.google.com/scholar?q=related:8OOmScCnNsYJ:scholar.google.com/&scioq=sapodila+bacterial+infection&hl=en&as_sdt=2007
44	0	S Senthilkumar, S Srivignesh, AR Kumar, ...	Sapota (Manilkara achras (Mill.) Fosberg)		cutn.ac.in		https://cutn.ac.in/ssr/qnm/c3/345/480/15-Sapota-576-609.pdf		44	2024-07-09 11:44:40	PDF								0	0	0	4		… Sapota is commonly named as chiku, sapodilla and is mainly cultivated in India for its fruit value. In the regions of South-East Mexico, Guatemala and other parts of the world, it is …	https://cutn.ac.in/ssr/qnm/c3/345/480/15-Sapota-576-609.pdf	https://scholar.google.com/scholar?q=related:IStJ8mt1UYsJ:scholar.google.com/&scioq=sapodila+bacterial+infection&hl=en&as_sdt=2007
45	4	Laldinchhana, J Lalrengpuii, S Ray, ...	Indian tropical fruits and their bioactive compounds against human diseases	2020	Plant-derived Bioactives …	Springer	https://link.springer.com/chapter/10.1007/978-981-15-2361-8_21	https://scholar.google.com/scholar?cites=11300177094540009552&as_sdt=2005&sciodt=2007&hl=en	45	2024-07-09 11:44:40		10.1007/978-981-15-2361-8_21							4	1	1	4	4	… effective against Gram-positive bacteria than Gram-negative bacteria, while showing no … Like other fruits, the phytochemical contents of sapodilla also change as the fruit progressed …		https://scholar.google.com/scholar?q=related:UCAQUzJL0pwJ:scholar.google.com/&scioq=sapodila+bacterial+infection&hl=en&as_sdt=2007
46	51	T Sarkar, M Salauddin, A Roy, N Sharma, ...	Minor tropical fruits as a potential source of bioactive and functional foods	2023	Critical Reviews in …	Taylor &Francis	https://www.tandfonline.com/doi/abs/10.1080/10408398.2022.2033953	https://scholar.google.com/scholar?cites=6184365387576465295&as_sdt=2005&sciodt=2007&hl=en	46	2024-07-09 11:44:40		10.1080/10408398.2022.2033953							51	51	10	5	1	… Studies reported that both leaves and bark extract of sapodilla reflects the potential of anti-microbial activities. Compounds like glycosides, flavonoids and terpenoids are responsible for …		https://scholar.google.com/scholar?q=related:j1e3x41H01UJ:scholar.google.com/&scioq=sapodila+bacterial+infection&hl=en&as_sdt=2007
47	33	K Shanmugapriya, PS Saravana, H Payal, ...	A comparative study of antimicrobial potential and phytochemical analysis of Artocarpus heterophyllus and Manilkara zapota seed extracts	2011	J Pharm Res	Citeseer	https://citeseerx.ist.psu.edu/document?repid=rep1&type=pdf&doi=9572142d9826484392b0c875b9feb4e905b50451	https://scholar.google.com/scholar?cites=13283902212520145931&as_sdt=2005&sciodt=2007&hl=en	47	2024-07-09 11:44:40	PDF								33	2.54	8	4	13	… infections and spread of deadly, drug-resistant strains of organisms pose a challenge to the global public health for their treatment. Bacterial resistance … (Sapodilla) belongs to the family …	https://citeseerx.ist.psu.edu/document?repid=rep1&type=pdf&doi=9572142d9826484392b0c875b9feb4e905b50451	https://scholar.google.com/scholar?q=related:C_RJYK7mWbgJ:scholar.google.com/&scioq=sapodila+bacterial+infection&hl=en&as_sdt=2007
48	3	AK Basak, T Chatterjee, D Majumder, ...	Evaluation of antimicrobial potential of juices of some common citrus and non-citrus fruits of India	2017	Int. J. Curr. Microbiol …	academia.edu	https://www.academia.edu/download/71234668/Ashim_20Kumar_20Basak__20et_20al.pdf	https://scholar.google.com/scholar?cites=9783547406758787734&as_sdt=2005&sciodt=2007&hl=en	48	2024-07-09 11:44:40	PDF								3	0.43	1	4	7	… bacteria have led to the spread of the resistant strains of microorganisms making treatment of bacterial infections … Sapodilla juice, however, showed appreciable inhibitory potential both …	https://www.academia.edu/download/71234668/Ashim_20Kumar_20Basak__20et_20al.pdf	https://scholar.google.com/scholar?q=related:ljoN74ckxocJ:scholar.google.com/&scioq=sapodila+bacterial+infection&hl=en&as_sdt=2007
49	2	A Rani, T Gupta, K Kangra, V Garg, R Dutt	Evaluation of Antioxidant, antibacterial and anticancer activity of fruit and leaf extracts of Manilkara zapota against A431 skin cancer cell lines	2023	South African Journal of …	Elsevier	https://www.sciencedirect.com/science/article/pii/S0254629922006871	https://scholar.google.com/scholar?cites=930591726161803555&as_sdt=2005&sciodt=2007&hl=en	49	2024-07-09 11:44:40									2	2	0	5	1	… known as Chikoo, Sapota and Sapodilla. It is highly potential … method against the various bacterial strains viz. Bacillus … highest efficacy against the four bacterial strains. Among all of …		https://scholar.google.com/scholar?q=related:I7nKlD4g6gwJ:scholar.google.com/&scioq=sapodila+bacterial+infection&hl=en&as_sdt=2007
50	23	MH Baky, MB Elsaid, MA Farag	Phytochemical and biological diversity of triterpenoid saponins from family Sapotaceae: A comprehensive review	2022	Phytochemistry	Elsevier	https://www.sciencedirect.com/science/article/pii/S0031942222002618	https://scholar.google.com/scholar?cites=13423239655806129064&as_sdt=2005&sciodt=2007&hl=en	50	2024-07-09 11:44:40									23	11.5	8	3	2	Sapotaceae is a flowering plants family reported for its richness in triterpenoid saponins. Sapotaceae comprises a large number of fruit-producing plants of nutritional and medicinal …		https://scholar.google.com/scholar?q=related:qNNC-1jtSLoJ:scholar.google.com/&scioq=sapodila+bacterial+infection&hl=en&as_sdt=2007
51	25	FC Ngongang, AG Fankam, AT Mbaveng, BE Wamba, ...	Methanol extracts from Manilkara zapota with moderate antibacterial activity displayed strong antibiotic-modulating effects against multidrug-resistant phenotypes	2020	Pharmacology	ajol.info	https://www.ajol.info/index.php/imcp/article/view/253757	https://scholar.google.com/scholar?cites=3640272905569798567&as_sdt=2005&sciodt=2007&hl=en	51	2024-07-09 11:44:40									25	6.25	5	5	4	… infections. Therefore, their nonjudicious use has led to the emergence, spread, and persistence of multidrug-resistant (MDR) bacteria … treatments of bacterial infections appears amongst …	https://www.ajol.info/index.php/imcp/article/view/253757/239748	https://scholar.google.com/scholar?q=related:p4n3revYhDIJ:scholar.google.com/&scioq=sapodila+bacterial+infection&hl=en&as_sdt=2007
52	16	N La Jun Ting, S Fuloria, V Subramaniyan, ...	Response Of Various Extracts Of Manilkarazapota (L) Seeds Against Periodontitis Triggering Microbiota	2021	… & ESSENTIAL OILS …	nveo.org	http://www.nveo.org/index.php/journal/article/view/2745	https://scholar.google.com/scholar?cites=9841334085674217886&as_sdt=2005&sciodt=2007&hl=en	52	2024-07-09 11:44:40									16	5.33	4	4	3	… bacteria in a symbiotic relationship, but a little disturbance could manifest invarious infections [1,2]. … Manilkara zapota (L.) plant known as the sapodilla belongs to Sapotaceae family, …	https://www.nveo.org/index.php/journal/article/download/2745/2352	https://scholar.google.com/scholar?q=related:njGOlDVxk4gJ:scholar.google.com/&scioq=sapodila+bacterial+infection&hl=en&as_sdt=2007
53	13	A Ganguly, SMA Rahman	Evaluation of the cytotoxic, antimicrobial, antioxidant, anthelmintic and cns depressant activities of Manilkara zapota leaf (Sapotaceae)	2014	World Journal …	wjpr.s3.ap-south-1.amazonaws.com	https://wjpr.s3.ap-south-1.amazonaws.com/article_issue/1420089713.pdf	https://scholar.google.com/scholar?cites=13872998326359852448&as_sdt=2005&sciodt=2007&hl=en	53	2024-07-09 11:44:40	PDF								13	1.3	7	2	10	… used in the treatment of infectious diseases, oxidative stress, no … ’s pre-inoculated with test bacteria and fungi. The plates were … The bacterial and fungal strains used for the experiment …	https://wjpr.s3.ap-south-1.amazonaws.com/article_issue/1420089713.pdf	https://scholar.google.com/scholar?q=related:oIVEvHnKhsAJ:scholar.google.com/&scioq=sapodila+bacterial+infection&hl=en&as_sdt=2007
54	19	B Madani, A Mirshekari, E Yahia, ...	Sapota (Manilkara achras Forb.) Factors Influencing Fresh and Processed Fruit Quality	2018	Horticultural …	Wiley Online Library	https://onlinelibrary.wiley.com/doi/abs/10.1002/9781119431077.ch4	https://scholar.google.com/scholar?cites=12849621588729138672&as_sdt=2005&sciodt=2007&hl=en	54	2024-07-09 11:44:40		10.1002/9781119431077.ch4							19	3.17	5	4	6	… Sapota, also known as sapodilla, contains high levels of ascorbic acid and phenolic compounds which contribute to its numerous pur ported human health benefits. The fruit is …	https://www.academia.edu/download/79058160/2018_Madani_Mirshekari_Yahia_Goldeng_Sapota_HortRev-1.pdf	https://scholar.google.com/scholar?q=related:8A1kNsEGU7IJ:scholar.google.com/&scioq=sapodila+bacterial+infection&hl=en&as_sdt=2007
55	14	WE de Souza Freitas, ML Bezerra Almeida, ...	Potassium permanganate effects on the quality and post-harvest conservation of sapodilla (Manilkara zapota (L.) P. Royen) fruits under modified atmosphere	2017	Acta …	scielo.org.co	http://www.scielo.org.co/scielo.php?pid=S0120-28122017000300331&script=sci_arttext	https://scholar.google.com/scholar?cites=506785503200057929&as_sdt=2005&sciodt=2007&hl=en	55	2024-07-09 11:44:40	HTML								14	2	5	3	7	… The potassium permanganate doses influenced the sapodilla fruit quality, … of sapodilla fruits throughout five days storage under modified atmosphere at room temperature. The sapodilla …	http://www.scielo.org.co/scielo.php?pid=S0120-28122017000300331&script=sci_arttext	https://scholar.google.com/scholar?q=related:SZqO57p2CAcJ:scholar.google.com/&scioq=sapodila+bacterial+infection&hl=en&as_sdt=2007
56	0	U Ariyasoma, DL Wathugala	Nutritional and therapeutic attributes of neglected and underutilized fruit crops in Sri Lanka and their potential applications in value addition		ijmfmap.in		https://www.ijmfmap.in/pdf_vol9_2/vol_9_2_5.pdf		56	2024-07-09 11:44:40	PDF								0	0	0	2		Sri Lanka endowed a rich biodiversity, making it a significant source of plant species used as food sources. Fruits serving as both desserts and refreshments. Major and minor fruits …	https://www.ijmfmap.in/pdf_vol9_2/vol_9_2_5.pdf	https://scholar.google.com/scholar?q=related:IVcgU5-onHQJ:scholar.google.com/&scioq=sapodila+bacterial+infection&hl=en&as_sdt=2007
57	0	SK Singh, C Prasad, SK Singh, ...	In-Vitro Analysis of Extracts of Fresh Fruits and their Precaps Against Pathogenic Microbes	2019	Int. J. Sci. Res. in …	pdfs.semanticscholar.org	https://pdfs.semanticscholar.org/f516/89ca24e074f96c6fd3146fe387529ed78180.pdf		57	2024-07-09 11:44:40	PDF								0	0	0	4	5	… -negative, rod-shaped bacterium that can cause diseases in … , rodshaped, coliform bacterium commonly found in the lower … clear zones except in sapodilla which only gave results in …	https://pdfs.semanticscholar.org/f516/89ca24e074f96c6fd3146fe387529ed78180.pdf	https://scholar.google.com/scholar?q=related:DnTbRRV3b2IJ:scholar.google.com/&scioq=sapodila+bacterial+infection&hl=en&as_sdt=2007
58	7	M Ezhilan, N Nesakumar, KJ Babu, ...	A multiple approach combined with portable electronic nose for assessment of post-harvest sapota contamination by foodborne pathogens	2020	Food and Bioprocess …	Springer	https://link.springer.com/article/10.1007/s11947-020-02473-2	https://scholar.google.com/scholar?cites=6740791330087205334&as_sdt=2005&sciodt=2007&hl=en	58	2024-07-09 11:44:40		10.1007/s11947-020-02473-2							7	1.75	2	4	4	… fresh sapota from bacterial contaminated sapota samples. … Also, Staphylococcus bacteria were detected for the same set … ) stated that 550 million infections and 230,000 deaths occur …		https://scholar.google.com/scholar?q=related:1nnhHgAajF0J:scholar.google.com/&scioq=sapodila+bacterial+infection&hl=en&as_sdt=2007
59	3	LC Mourão Mulvaney, FH Xavier-Júnior, ...	Antimicrobial and anthelmintic activities of the ethanolic extract, fractions and isolated compounds from Manilkara zapota LP Royen (Sapotaceae)	2021	Journal of Pharmacy …	academic.oup.com	https://academic.oup.com/jpp/article-abstract/73/3/377/6128452	https://scholar.google.com/scholar?cites=16639187992413125054&as_sdt=2005&sciodt=2007&hl=en	59	2024-07-09 11:44:40									3	1	1	3	3	… Infectious diseases caused by bacteria, viruses, fungi and parasites are the greatest cause of death, disability, and social and economic difficulties for millions of people worldwide. [1] …		https://scholar.google.com/scholar?q=related:vrm6JlJF6uYJ:scholar.google.com/&scioq=sapodila+bacterial+infection&hl=en&as_sdt=2007
60	8	J Sunder, T Sujatha, A Kundu, ...	Medicinal, plant and ethno-veterinary practices used in south and north and a mian	2014	J. Andaman Sci. Assoc.	researchgate.net	https://www.researchgate.net/profile/Jai-Sunder/publication/295858548_Medicinal_plant_and_ethnoveterinary_practices_used_in_South_and_North_Andaman/links/56f9099208ae81582bf42d01/Medicinal-plant-and-ethnoveterinary-practices-used-in-South-and-North-Andaman.pdf	https://scholar.google.com/scholar?cites=14212805093175544421&as_sdt=2005&sciodt=2007&hl=en	60	2024-07-09 11:44:40	PDF								8	0.8	2	4	10	… epidemic and endemic infectious diseases like Rinderpest, Septicemia, Anthrax and acute life-threatening bacterial diseases though they can cope with a reasonable spectrum of …	https://www.researchgate.net/profile/Jai-Sunder/publication/295858548_Medicinal_plant_and_ethnoveterinary_practices_used_in_South_and_North_Andaman/links/56f9099208ae81582bf42d01/Medicinal-plant-and-ethnoveterinary-practices-used-in-South-and-North-Andaman.pdf	https://scholar.google.com/scholar?q=related:ZUqX-O0GPsUJ:scholar.google.com/&scioq=sapodila+bacterial+infection&hl=en&as_sdt=2007
61	3	TK Lim, TK Lim	Manilkara zapota	2013	Edible Medicinal And Non-Medicinal Plants: Volume 6 …	Springer	https://link.springer.com/chapter/10.1007/978-94-007-5628-1_20	https://scholar.google.com/scholar?cites=2150480490145276362&as_sdt=2005&sciodt=2007&hl=en	61	2024-07-09 11:44:40		10.1007/978-94-007-5628-1_20							3	0.27	2	2	11	… Sapodilla is indigenous to Yucatan and other adjacent areas of … bacterial growth, revealing that the QS inhibition by the extract was not related to static or killing effects on the bacteria…		https://scholar.google.com/scholar?q=related:ymGEr5wK2B0J:scholar.google.com/&scioq=sapodila+bacterial+infection&hl=en&as_sdt=2007
62	5	MF Rivas-Gastelum, LE Garcia-Amezquita, ...	… zapota “chicozapote” as a fruit source of health-beneficial bioactive compounds and its effects on chronic degenerative and infectious diseases, a review	2023	Frontiers in …	frontiersin.org	https://www.frontiersin.org/articles/10.3389/fnut.2023.1194283/full	https://scholar.google.com/scholar?cites=11339103906473724303&as_sdt=2005&sciodt=2007&hl=en	62	2024-07-09 11:44:40	HTML	10.3389/fnut.2023.1194283							5	5	2	3	1	Frontiers | Manilkara zapota “chicozapote” as a fruit source of health-beneficial bioactive compounds and its effects on chronic degenerative and infectious diseases, a review Skip to …	https://www.frontiersin.org/articles/10.3389/fnut.2023.1194283/full	https://scholar.google.com/scholar?q=related:j0mcAO2WXJ0J:scholar.google.com/&scioq=sapodila+bacterial+infection&hl=en&as_sdt=2007
63	1	SD Somwanshi, SJ Magar, ...	Postharvest Diseases of Minor Fruits and Their Management	2021	… Handling and Diseases …	taylorfrancis.com	https://www.taylorfrancis.com/chapters/edit/10.1201/9781003045502-26/postharvest-diseases-minor-fruits-management-somwanshi-sunita-magar-suryawanshi	https://scholar.google.com/scholar?cites=8933667321359983110&as_sdt=2005&sciodt=2007&hl=en	63	2024-07-09 11:44:40		10.1201/9781003045502-26							1	0.33	0	3	3	… The key factors responsible for the development of postharvest diseases in sapota (Sapodilla) fruit are high moisture and nutrient content. Symptoms of fruit rot as an infection of …		https://scholar.google.com/scholar?q=related:BmItnxjD-nsJ:scholar.google.com/&scioq=sapodila+bacterial+infection&hl=en&as_sdt=2007
64	5	AK Srivastava, P Kashyap, VS Meena, ...	Sapota [(Manilkara achras (Mill.) Fosberg (Syn: Achras zapota L.)]	2017	Ghos h SN, Singh A …	researchgate.net	https://www.researchgate.net/profile/Vijay-Meena-3/publication/317578984_Sapota_Manilkara_achras_Mill_Fosberg_Syn_Achras_zapota_L/links/5940fd67a6fdcccda9b59c08/Sapota-Manilkara-achras-Mill-Fosberg-Syn-Achras-zapota-L.pdf	https://scholar.google.com/scholar?cites=17953933746645535402&as_sdt=2005&sciodt=2007&hl=en	64	2024-07-09 11:44:40	PDF								5	0.71	1	4	7	… Sapota is known by number of names including chico, sapodilla, lamut, chicle etc. Its fruits are available almost throughout the year. It is hardy, highly productive and generally free from …	https://www.researchgate.net/profile/Vijay-Meena-3/publication/317578984_Sapota_Manilkara_achras_Mill_Fosberg_Syn_Achras_zapota_L/links/5940fd67a6fdcccda9b59c08/Sapota-Manilkara-achras-Mill-Fosberg-Syn-Achras-zapota-L.pdf	https://scholar.google.com/scholar?q=related:qoq0WZ4vKfkJ:scholar.google.com/&scioq=sapodila+bacterial+infection&hl=en&as_sdt=2007
65	21	P de Brum Vieira, NLF Silva, CB Menezes, MV da Silva, ...	Trichomonicidal and parasite membrane damaging activity of bidesmosic saponins from Manilkara rufula	2017	Plos one	journals.plos.org	https://journals.plos.org/plosone/article?id=10.1371/journal.pone.0188531	https://scholar.google.com/scholar?cites=2119946714747100302&as_sdt=2005&sciodt=2007&hl=en	65	2024-07-09 11:44:40	HTML								21	3	4	5	7	… Globally, this infection affects 276 million people per year and increases susceptibility to HIV infection and the risk of cervical and prostate cancer [1]. The mainstay medication for …	https://journals.plos.org/plosone/article?id=10.1371/journal.pone.0188531	https://scholar.google.com/scholar?q=related:jtxBG06Qax0J:scholar.google.com/&scioq=sapodila+bacterial+infection&hl=en&as_sdt=2007
66	0	A Aziz, U Shahid, A Tanveer, M Asif, ...	Identification and validation of anti-microbial properties of some tropical folklore medicinal plant species against some multi-resistant bacterial pathogens.	2021	Pakistan Journal of …	api.pakjas.com.pk	https://api.pakjas.com.pk/downloadPaper/Identification%20and%20validation%20of%20anti-microbial%20properties%20of%20some%20tropical%20folklore%20medicinal%20plant%20species%20against%20some%20multi-resistant%20bacterial%20pathogens.pdf		66	2024-07-09 11:44:40	PDF								0	0	0	5	3	… Conclusion: This study concluded that some tropical plant extracts should be used against bacterial infections after conducting toxicity tests of the active compounds of highly effective …	https://api.pakjas.com.pk/downloadPaper/Identification%20and%20validation%20of%20anti-microbial%20properties%20of%20some%20tropical%20folklore%20medicinal%20plant%20species%20against%20some%20multi-resistant%20bacterial%20pathogens.pdf	https://scholar.google.com/scholar?q=related:pyzFuLlCAs0J:scholar.google.com/&scioq=sapodila+bacterial+infection&hl=en&as_sdt=2007
67	3	LCM Mulvaney, FH Xavier-Júnior, ...	Antimicrobial and anthelmintic activities of the ethanolic extract, fractions and isolated compounds from Manilkara zapota LP Royen (Sapotaceae)	2021	Journal of Pharmacy …	hal.science	https://hal.science/hal-03137153/	https://scholar.google.com/scholar?cites=15358313932945560373&as_sdt=2005&sciodt=2007&hl=en	67	2024-07-09 11:44:40									3	1	1	3	3	… Infectious diseases caused by bacteria, viruses, fungi, and … Infections caused by microorganisms such as Staphylococcus … Sapodilla seed coat as a multifunctional ingredient 599 …	https://hal.science/hal-03137153/file/MULVANEY%20et%20al%202020%20JPP%20-%20Revised.pdf	https://scholar.google.com/scholar?q=related:NRMnciaxI9UJ:scholar.google.com/&scioq=sapodila+bacterial+infection&hl=en&as_sdt=2007
68	0	MVS Marathe, MAP Nikum, MGS Marathe, MSG Patil, ...	Formulation and Evaluation of Herbal Face Scrub		academia.edu		https://www.academia.edu/download/105407796/formulation-and-evaluation-of-herbal-face-scrub.pdf		68	2024-07-09 11:44:40	PDF								0	0	0	5		… scrub with incorporation of the sapodilla as an active ingredient. … A skin may becomes more vulnerable to infections and … Both bacterial and fungal resistance are present in propylene …	https://www.academia.edu/download/105407796/formulation-and-evaluation-of-herbal-face-scrub.pdf	https://scholar.google.com/scholar?q=related:o5vkP08B3ukJ:scholar.google.com/&scioq=sapodila+bacterial+infection&hl=en&as_sdt=2007
69	0	SC Das	Govind Pratap Rao, Madhupriya, Surabhi Mitra, Joy Michal Johnson, Prasenjit Debnath, Amar Bahadur &	2020	Physiol Mol Biol Plants	researchgate.net	https://www.researchgate.net/profile/G-Rao-12/publication/348766956_First_report_of_16SrXI-B_subgroup_phytoplasma_in_sapota_showing_flattened_stem_disease_in_India/links/60a14f86458515c26599240a/First-report-of-16SrXI-B-subgroup-phytoplasma-in-sapota-showing-flattened-stem-disease-in-India.pdf		69	2024-07-09 11:44:40	PDF								0	0	0	1	4	… infected mother stalks during grafting or planting young seedlings with latent infection of phyto… They may transmit phytoplasma from their herbaceous hosts to the sapodilla trees which is …	https://www.researchgate.net/profile/G-Rao-12/publication/348766956_First_report_of_16SrXI-B_subgroup_phytoplasma_in_sapota_showing_flattened_stem_disease_in_India/links/60a14f86458515c26599240a/First-report-of-16SrXI-B-subgroup-phytoplasma-in-sapota-showing-flattened-stem-disease-in-India.pdf	https://scholar.google.com/scholar?q=related:1Uzw9DaRJD4J:scholar.google.com/&scioq=sapodila+bacterial+infection&hl=en&as_sdt=2007
70	1	MM Hegde, K Lakshman	Phyto-pharmacological review of genus manilkara	2023	Int J Herb Med	florajournal.com	https://www.florajournal.com/archives/2023/vol11issue5/PartA/9-3-36-307.pdf	https://scholar.google.com/scholar?cites=10210822773585382783&as_sdt=2005&sciodt=2007&hl=en	70	2024-07-09 11:44:40	PDF								1	1	1	2	1	… that root can be used to fight infections against both Gram positive and negative bacteria [22]. … Protective effect of lyophilized sapodilla (Manilkara zapota) fruit extract against CCl4-…	https://www.florajournal.com/archives/2023/vol11issue5/PartA/9-3-36-307.pdf	https://scholar.google.com/scholar?q=related:f40GnDYhtI0J:scholar.google.com/&scioq=sapodila+bacterial+infection&hl=en&as_sdt=2007
71	2	K Acosta, MQ Pantoja, E Pérez-López	Diversity of Phytoplasmas in Cuba, Their Geographic Isolation and Potential Development of Management Strategies	2019	… Diseases in Crops Grown in the …	Springer	https://link.springer.com/chapter/10.1007/978-3-030-29650-6_4	https://scholar.google.com/scholar?cites=3737892515516548219&as_sdt=2005&sciodt=2007&hl=en	71	2024-07-09 11:44:40		10.1007/978-3-030-29650-6_4							2	0.4	1	3	5	… phytoplasma diseases caused by infection of single or multiple strains of phytoplasmas and affecting three economically important crop plants of Cuba, sapodilla (Manilkara zapota L. (…	https://www.researchgate.net/profile/Jin-Zhao-31/publication/339049126_The_Resistance_of_Jujube_Trees_to_Jujube_Witches%27_Broom_Disease_in_China/links/5ef69725458515505075247b/The-Resistance-of-Jujube-Trees-to-Jujube-Witches-Broom-Disease-in-China.pdf#page=95	https://scholar.google.com/scholar?q=related:e4T0S3Cp3zMJ:scholar.google.com/&scioq=sapodila+bacterial+infection&hl=en&as_sdt=2007
72	0	MR Usman, AA Patil, ...	Research Study of Sapota Leaves and Bael Fruit Containing Natural Hair Cleanser	2024	… American Journal of …	actafarmbonaerense.com.ar	http://actafarmbonaerense.com.ar/index.php/latamjpharm/article/view/957		72	2024-07-09 11:44:40									0	0	0	3	1	… blood circulation and treat bacterial infections. Its topical … Sapodilla is a rich source of nutrients (sugars, acids, protein, … have been isolated from sapodilla fruit, including triterpenes and …	http://actafarmbonaerense.com.ar/index.php/latamjpharm/article/download/957/846	https://scholar.google.com/scholar?q=related:3NJ9EL2CVgMJ:scholar.google.com/&scioq=sapodila+bacterial+infection&hl=en&as_sdt=2007
73	0	K Sharma, D Unnikrishnan Meenakshi, V Chinnasamyº, ...	Response Of Various Extracts Of Manilkarazapota (L) Seeds Against Periodontitis Triggering Microbiota		pharmacy.accurate.in		https://pharmacy.accurate.in/pdf/NVEO-PKS.pdf		73	2024-07-09 11:44:40	PDF								0	0	0	4		… bacteria in a symbiotic relationship, but a little disturbance could manifest invarious infections [1,2]. … Manilkara zapota (L.) plant known as the sapodilla belongs to Sapotaceae family, …	https://pharmacy.accurate.in/pdf/NVEO-PKS.pdf	https://scholar.google.com/scholar?q=related:2wdK0kAO-uIJ:scholar.google.com/&scioq=sapodila+bacterial+infection&hl=en&as_sdt=2007
74	9	Y Tyagi, NVS Madhav	Design of selegiline-loaded bio-nanosuspension for the management of depression using novel bio-retardant from Manilkara zapota	2019	Drug Development and Industrial …	Taylor &Francis	https://www.tandfonline.com/doi/shareview/10.1080/03639045.2019.1619760	https://scholar.google.com/scholar?cites=813900777802253812&as_sdt=2005&sciodt=2007&hl=en	74	2024-07-09 11:44:40		10.1080/03639045.2019.1619760							9	1.8	5	2	5	… from fruit pulp of Manilkara zapota (Sapodilla) by sonication solvent evaporation method with … Manilkara zapota (Sapodilla) provided excellent stability for the formulation and resulting …		https://scholar.google.com/scholar?q=related:9EVR93GOSwsJ:scholar.google.com/&scioq=sapodila+bacterial+infection&hl=en&as_sdt=2007
75	3	M Praveena, R Subaratinam	Formulation and evaluation of sapota flavoured cotton seed milk	2021	International Journal of …	sdnbvc.edu.in	http://www.sdnbvc.edu.in/wp-content/uploads/2021/08/PAPER-ID-3-1.pdf	https://scholar.google.com/scholar?cites=12827320879091753175&as_sdt=2005&sciodt=2007&hl=en	75	2024-07-09 11:44:40	PDF								3	1	2	2	3	… The sapodilla boosts immunity, strengthens the intestine and prevents from many bacterial infections due to presence of vitamin-C. The fibre and vitamin-A content of sapodilla fruit …	http://www.sdnbvc.edu.in/wp-content/uploads/2021/08/PAPER-ID-3-1.pdf	https://scholar.google.com/scholar?q=related:1yA3omDMA7IJ:scholar.google.com/&scioq=sapodila+bacterial+infection&hl=en&as_sdt=2007
76	0	S Kapil	Role of Sthanik Chikitsa in Shweta Pradara Associated with Madhumeha (DM Type-II): A Case Study	2023	International Journal of Ayurveda and Pharma …	ijapr.ijraps.in	https://ijapr.ijraps.in/index.php/ijapr/article/view/2619		76	2024-07-09 11:44:40									0	0	0	1	1	… of fungal and bacterial infections effectively. It … infections. That was the reason; attaining normal blood glucose level in this patient was foremost requirement to combat vaginal infections. …	https://ijapr.ijraps.in/index.php/ijapr/article/download/2619/1971	https://scholar.google.com/scholar?q=related:c7Xb2Bt4fsUJ:scholar.google.com/&scioq=sapodila+bacterial+infection&hl=en&as_sdt=2007
77	6	K Platel	Functional foods in Indian tradition and their significance for health	2020	Nutritional and Health Aspects of Food in South Asian …	Elsevier	https://www.sciencedirect.com/science/article/pii/B9780128200117000083	https://scholar.google.com/scholar?cites=10594150688452058399&as_sdt=2005&sciodt=2007&hl=en	77	2024-07-09 11:44:40									6	1.5	6	1	4	… Bovine colostrum has possible use in the treatment or prevention of gastrointestinal tract infections. It is said to be the only natural source of transforming and insulin-like growth factors. …		https://scholar.google.com/scholar?q=related:Hx0lwuv7BZMJ:scholar.google.com/&scioq=sapodila+bacterial+infection&hl=en&as_sdt=2007
78	1	S Agneswari, S Amutha, V Ariharan	Comparative evaluation of antioxidant and antimicrobial activity of Dendrophthoe falcata leaves collected from two different host plants	2021	Int. J. Bot. Stud	researchgate.net	https://www.researchgate.net/profile/Ariharan-V-N/publication/359494295_International_Journal_of_Botany_Studies_wwwbotanyjournalscom_Comparative_evaluation_of_antioxidant_and_antimicrobial_activity_of_Dendrophthoe_falcata_leaves_collected_from_two_different_host_plants/links/623f30ad57084c718b6a0846/International-Journal-of-Botany-Studies-wwwbotanyjournalscom-Comparative-evaluation-of-antioxidant…	https://scholar.google.com/scholar?cites=4161717569042253180&as_sdt=2005&sciodt=2007&hl=en	78	2024-07-09 11:44:40	PDF								1	0.33	0	3	3	… The antimicrobial assay was performed against the bacteria and … comparing their activity against bacteria. The ethanolic extract … as Trait 1 and from Sapodilla tree is grouped as Trait 2. …	https://www.researchgate.net/profile/Ariharan-V-N/publication/359494295_International_Journal_of_Botany_Studies_wwwbotanyjournalscom_Comparative_evaluation_of_antioxidant_and_antimicrobial_activity_of_Dendrophthoe_falcata_leaves_collected_from_two_different_host_plants/links/623f30ad57084c718b6a0846/International-Journal-of-Botany-Studies-wwwbotanyjournalscom-Comparative-evaluation-of-antioxidant…	https://scholar.google.com/scholar?q=related:fAVEThRkwTkJ:scholar.google.com/&scioq=sapodila+bacterial+infection&hl=en&as_sdt=2007
79	642	K Mahattanatawee, JA Manthey, G Luzio, ...	Total antioxidant activity and fiber content of select Florida-grown tropical fruits	2006	Journal of agricultural …	ACS Publications	https://pubs.acs.org/doi/abs/10.1021/jf060566s	https://scholar.google.com/scholar?cites=16200850853517051365&as_sdt=2005&sciodt=2007&hl=en	79	2024-07-09 11:44:40		10.1021/jf060566s							642	35.67	161	4	18	… in the large intestine through bacterial enzymes, converting it to … sapodilla (unripe) was ranked highest in antioxidant activity in that study. The present study investigated ripe sapodilla, …	https://www.academia.edu/download/33529076/Reprint969.pdf	https://scholar.google.com/scholar?q=related:5cX39gP81OAJ:scholar.google.com/&scioq=sapodila+bacterial+infection&hl=en&as_sdt=2007
80	0	F Farahnaaz	Research of bacterial and fungal counts on dried, semi-dried and raw foods collected from Dhaka, Bangladesh, and their reduction methods	2017	博士学位論文/本文 (平成 28 年度授与)	kindai.repo.nii.ac.jp	https://kindai.repo.nii.ac.jp/record/19184/files/Thesis_Summary%20Ag0221-20170321-0001.pdf		80	2024-07-09 11:44:40	PDF								0	0	0	1	7	… the current study identified the bacterial and fungal counts of dried, semi-dried and raw … plant bacteria or fungi and the growth of pathogenic bacteria on vegetable surfaces, with the …	https://kindai.repo.nii.ac.jp/record/19184/files/Thesis_Summary%20Ag0221-20170321-0001.pdf	https://scholar.google.com/scholar?q=related:kQ4vt6jukqAJ:scholar.google.com/&scioq=sapodila+bacterial+infection&hl=en&as_sdt=2007
81	31	C Vishwasrao, S Chakraborty, ...	Partial purification, characterisation and thermal inactivation kinetics of peroxidase and polyphenol oxidase isolated from Kalipatti sapota (Manilkara zapota)	2017	Journal of the …	Wiley Online Library	https://onlinelibrary.wiley.com/doi/abs/10.1002/jsfa.8215	https://scholar.google.com/scholar?cites=2595259775698885708&as_sdt=2005&sciodt=2007&hl=en	81	2024-07-09 11:44:40		10.1002/jsfa.8215							31	4.43	10	3	7	… Depending on the food system, the endogenous enzyme can have a higher temperature resistance than certain non-spore-bearing bacteria, lactic acid bacteria, yeast and moulds. In …		https://scholar.google.com/scholar?q=related:TFxkBgQ3BCQJ:scholar.google.com/&scioq=sapodila+bacterial+infection&hl=en&as_sdt=2007
82	0	P Brum Vieira, NL Feijo Silva, ...	Trichomonicidal and parasite membrane damaging activity of bidesmosic saponins from Manilkara rufula	2017	PLoS One, 2017, vol …	diposit.ub.edu	https://diposit.ub.edu/dspace/handle/2445/130925		82	2024-07-09 11:44:40									0	0	0	3	7	… Globally, this infection affects 276 million people per year and increases susceptibility to HIV infection and the risk of cervical and prostate cancer [1]. The mainstay medication for …	https://diposit.ub.edu/dspace/bitstream/2445/130925/1/686102.pdf	https://scholar.google.com/scholar?q=related:566GQjWbUmMJ:scholar.google.com/&scioq=sapodila+bacterial+infection&hl=en&as_sdt=2007
83	14	H Sahoo, G Mahalik	Ethnobotanical survey of medicinal plants of Kantapada block of Cuttack district, Odisha, India	2020	International Journal of Biosciences	researchgate.net	https://www.researchgate.net/profile/Gyanranjan-Mahalik/publication/341794027_Ethnobotanical_survey_of_medicinal_plants_of_Kantapada_block_of_Cuttack_district_Odisha_India/links/5ed523ef92851c9c5e720b39/Ethnobotanical-survey-of-medicinal-plants-of-Kantapada-block-of-Cuttack-district-Odisha-India.pdf	https://scholar.google.com/scholar?cites=11036298076510859977&as_sdt=2005&sciodt=2007&hl=en	83	2024-07-09 11:44:40	PDF								14	3.5	7	2	4	… The fruit is rich in vitamin C which helps the body to cure infections, … The flowers are mixed with water in a preparation used to treat eye infections. The root (3 g) mixed with dried zinger (…	https://www.researchgate.net/profile/Gyanranjan-Mahalik/publication/341794027_Ethnobotanical_survey_of_medicinal_plants_of_Kantapada_block_of_Cuttack_district_Odisha_India/links/5ed523ef92851c9c5e720b39/Ethnobotanical-survey-of-medicinal-plants-of-Kantapada-block-of-Cuttack-district-Odisha-India.pdf	https://scholar.google.com/scholar?q=related:ybLBtaDOKJkJ:scholar.google.com/&scioq=sapodila+bacterial+infection&hl=en&as_sdt=2007
84	0	NA BROWN	VOLUME X AUGUST, 1920	1920	Phytopathology	American Phytopathological Society			84	2024-07-09 11:44:40	CITATION								0	0	0	1	104			https://scholar.google.com/scholar?q=related:2Qa2jIyd1CAJ:scholar.google.com/&scioq=sapodila+bacterial+infection&hl=en&as_sdt=2007
85	2	K Satyagopal, SN Sushil, P Jeyakumar, G Shankar, ...	AESA based IPM package for Sapota	2015		niphm.gov.in	https://niphm.gov.in/IPMPackages/Sapota-R.pdf	https://scholar.google.com/scholar?cites=17450288159007038333&as_sdt=2005&sciodt=2007&hl=en	85	2024-07-09 11:44:40	PDF								2	0.22	0	5	9	… Sapodilla can grow to more than 30 m tall with an average trunk diameter of 1.5 m. The … caused by fungi and bacteria. Count the number of plant, flower and fruit infected due to disease …	https://niphm.gov.in/IPMPackages/Sapota-R.pdf	https://scholar.google.com/scholar?q=related:fdvRAaDgK_IJ:scholar.google.com/&scioq=sapodila+bacterial+infection&hl=en&as_sdt=2007
86	12	G Gundewadi, SG Rudra, R Gogoi, T Banerjee, ...	Electrospun essential oil encapsulated nanofibers for the management of anthracnose disease in Sapota	2021	Industrial Crops and …	Elsevier	https://www.sciencedirect.com/science/article/pii/S092666902100491X	https://scholar.google.com/scholar?cites=3631784213929528095&as_sdt=2005&sciodt=2007&hl=en	86	2024-07-09 11:44:40									12	4	2	5	3	Control of anthracnose disease caused by Colletotrichum gloeosporioides by use of essential oils encapsulated in nanofibres made of polyvinyl alcohol has been attempted in this study…		https://scholar.google.com/scholar?q=related:HwskJICwZjIJ:scholar.google.com/&scioq=sapodila+bacterial+infection&hl=en&as_sdt=2007
87	1	S Sookkhee, Y Kumsang, B Sathian	Bacteriocin harvested from the synbiotic culture of selected lactic acid bacteria with various vegetables, cereals, fruits, medicinal and tuber plants: Inhibition of …	2022	CMU J. Nat. Sci	cmuj.cmu.ac.th	https://cmuj.cmu.ac.th/nlsc/journal/article/923	https://scholar.google.com/scholar?cites=8070499461567141226&as_sdt=2005&sciodt=2007&hl=en	87	2024-07-09 11:44:40	HTML								1	0.5	0	3	2	… bacteria against some gastrointestinal pathogens, to compare the activity between their synbiotic culture and bacteria … Among 600 isolates of selected lactic acid bacteria, three isolates …	https://cmuj.cmu.ac.th/nlsc/journal/article/923	https://scholar.google.com/scholar?q=related:atWwPoAsAHAJ:scholar.google.com/&scioq=sapodila+bacterial+infection&hl=en&as_sdt=2007
88	30	E Kowsalya, K MosaChristas, ...	Sustainable use of biowaste for synthesis of silver nanoparticles and its incorporation into gelatin‐based nanocomposite films for antimicrobial food packaging …	2021	Journal of Food …	Wiley Online Library	https://onlinelibrary.wiley.com/doi/abs/10.1111/jfpe.13641	https://scholar.google.com/scholar?cites=18003180976855544864&as_sdt=2005&sciodt=2007&hl=en	88	2024-07-09 11:44:40		10.1111/jfpe.13641							30	10	10	3	3	… The bacterial and fungal strains were grown overnight in NA and PDA liquid medium, … its effect on the shelf life of sapodilla (Manilkara zapota) fruits. The sapodilla fruits of the same size …		https://scholar.google.com/scholar?q=related:IHSLqLYl2PkJ:scholar.google.com/&scioq=sapodila+bacterial+infection&hl=en&as_sdt=2007
89	3	S Meghashri, JB Chauhan, AA Syed, ...	Effect of Ocimum tenuiflorum Leaf Extract against Infective Endocarditis	2011	International Journal of …	Citeseer	https://citeseerx.ist.psu.edu/document?repid=rep1&type=pdf&doi=58de5c2bc547020e2dba01ad0772b7e29260209b	https://scholar.google.com/scholar?cites=10098923607950574512&as_sdt=2005&sciodt=2007&hl=en	89	2024-07-09 11:44:40	PDF								3	0.23	1	4	13	… Bacterial endocarditis is a disease characterized by inflammation or infection of the inner … of catechin, caffeic acid and p-coumaric acid in sapodilla peel (Fig.1). The selection of these …	https://citeseerx.ist.psu.edu/document?repid=rep1&type=pdf&doi=58de5c2bc547020e2dba01ad0772b7e29260209b	https://scholar.google.com/scholar?q=related:sEOz2YOVJowJ:scholar.google.com/&scioq=sapodila+bacterial+infection&hl=en&as_sdt=2007
90	22	LI Syarif, AR Junita, M Hatta, R Dwiyanti, ...	A mini review: medicinal plants for typhoid fever in Indonesia	2020	Systematic Reviews in …	academia.edu	https://www.academia.edu/download/95181756/a-mini-review-medicinal-plants-for-typhoid-fever-in-indonesia.pdf	https://scholar.google.com/scholar?cites=15039684824405774443&as_sdt=2005&sciodt=2007&hl=en	90	2024-07-09 11:44:40	PDF								22	5.5	4	5	4	… in the treatment of bacterial infection including intracellular … activity against Salmonella bacteria with the optimal inhibitory … zone that formed 8.8 mm compared to other bacteria such …	https://www.academia.edu/download/95181756/a-mini-review-medicinal-plants-for-typhoid-fever-in-indonesia.pdf	https://scholar.google.com/scholar?q=related:axCKBKqxt9AJ:scholar.google.com/&scioq=sapodila+bacterial+infection&hl=en&as_sdt=2007
91	0	S ES	PRELIMINARY ANALYSIS OF FLORISTIC DIVERSITY IN SELECTED WARDS OF CHERANELLOOR PANCHAYAT	2023		117.239.78.102	http://117.239.78.102:8080/jspui/bitstream/123456789/2627/1/DOC-20230505-WA0045..pdf		91	2024-07-09 11:44:40	PDF								0	0	0	1	1	… the tropical countries, harbors 54,733 species including species of virus/bacteria and fungi. … Sapodilla can grow to more than 30 m (98 ft) tall with a trunk diameter of up to 1.5 m. The …	http://117.239.78.102:8080/jspui/bitstream/123456789/2627/1/DOC-20230505-WA0045..pdf	https://scholar.google.com/scholar?q=related:OS2AYHbpv2AJ:scholar.google.com/&scioq=sapodila+bacterial+infection&hl=en&as_sdt=2007
92	2	PJ Vazhacharickal, NK Sajeshkumar, JJ Mathew, ...	Common pest and diseases affecting Banana in South-India: an overview	2019		books.google.com	https://books.google.com/books?hl=en&lr=&id=oCnxDwAAQBAJ&oi=fnd&pg=PR6&dq=sapodila+bacterial+infection&ots=Wo7AY4knG2&sig=yQvNB58OBn_HWmTg6NTIvyzaiKU	https://scholar.google.com/scholar?cites=10799453748669397409&as_sdt=2005&sciodt=2007&hl=en	92	2024-07-09 11:44:40									2	0.4	1	4	5	… Bacterial wilt and Xanthomonas wilt are other bacterial diseases affecting the banana production. Bunchy top and bract mosaic are damaging virus diseases, which have a limited …	https://www.researchgate.net/profile/Prem-Vazhacharickal/publication/337705451_Common_pest_and_diseases_affecting_Banana_in_South-India_an_overview/links/5de60111299bf10bc33a8b7a/Common-pest-and-diseases-affecting-Banana-in-South-India-an-overview.pdf	https://scholar.google.com/scholar?q=related:oTmzafdd35UJ:scholar.google.com/&scioq=sapodila+bacterial+infection&hl=en&as_sdt=2007
93	2	U Chaurasiya, MK Solanki, S Patel	Medicinal plant extracts enhanced the shelf life of chilli fruits against the anthracnose disease through defense modulation	2023	Biochemical Systematics and Ecology	Elsevier	https://www.sciencedirect.com/science/article/pii/S0305197823000224	https://scholar.google.com/scholar?cites=16120583989503412346&as_sdt=2005&sciodt=2007&hl=en	93	2024-07-09 11:44:40									2	2	1	3	1	… of infected wounds in the control polybag treated with the DMSO alone, and NSc = average number of infected … Disease severity was assessed by measuring infected wounds’ lesion …		https://scholar.google.com/scholar?q=related:ekgzWrrRt98J:scholar.google.com/&scioq=sapodila+bacterial+infection&hl=en&as_sdt=2007
94	0	R Flower	Antioxidant and Antibacterial Properties of Manilkara zapota (L.)						94	2024-07-09 11:44:40	CITATION								0	0	0	1				https://scholar.google.com/scholar?q=related:2tOGucv-w9EJ:scholar.google.com/&scioq=sapodila+bacterial+infection&hl=en&as_sdt=2007
95	1	AF Ilhani, I Ismedsyah	RETRACTED: Antibacterial Activity Test Combination of Kencur (Kaempferia galanga L) Rhizome and Sapodilla (Manilkara zapota L) Leaf Extract against …	2018	Borneo Journal of Pharmacy	journal.umpr.ac.id	https://journal.umpr.ac.id/index.php/bjop/article/download/368/827	https://scholar.google.com/scholar?cites=12006298679406611517&as_sdt=2005&sciodt=2007&hl=en	95	2024-07-09 11:44:40	PDF								1	0.17	1	2	6	… anaerobic bacterium and … bacterium because it can cause primary infection of the intestine such as diarrhea in children and traveler diarrhea, as well as its ability to cause body infection …	https://journal.umpr.ac.id/index.php/bjop/article/download/368/827	https://scholar.google.com/scholar?q=related:PcxFbQnxnqYJ:scholar.google.com/&scioq=sapodila+bacterial+infection&hl=en&as_sdt=2007
96	18	TA Yanto, M Hatta, A Bukhari, ...	Molecular and immunological mechanisms of miana leaf (coleus scutellariodes [L] benth) in infectious diseases	2020	Biomedical and …	biomedpharmajournal.org	https://biomedpharmajournal.org/vol13no4/molecular-and-immunological-mechanisms-of-miana-leaf-coleus-scutellariodes-l-benth-in-infectious-diseases/	https://scholar.google.com/scholar?cites=6313168211273163530&as_sdt=2005&sciodt=2007&hl=en	96	2024-07-09 11:44:40	HTML								18	4.5	5	4	4	… that can enhance the body’s response to various parasitic and bacterial infections. … of bacterial cell walls, microsomes, and lysosomes. The interactions between flavonoids and bacterial …	https://biomedpharmajournal.org/vol13no4/molecular-and-immunological-mechanisms-of-miana-leaf-coleus-scutellariodes-l-benth-in-infectious-diseases/	https://scholar.google.com/scholar?q=related:CqM5IArhnFcJ:scholar.google.com/&scioq=sapodila+bacterial+infection&hl=en&as_sdt=2007
97	1	S Ekalina, P Sugita, IH Suparto	Antimicrobial activity of quercetin rich methanol fraction of Manilkara zapota bark.	2017		sipakaril.ipb.ac.id	https://sipakaril.ipb.ac.id/Files/894aff70-14b5-4de1-814e-bb16c00b1966/paper_894aff70-14b5-4de1-814e-bb16c00b1966.pdf	https://scholar.google.com/scholar?cites=10310711084995681759&as_sdt=2005&sciodt=2007&hl=en	97	2024-07-09 11:44:40	PDF								1	0.14	0	3	7	… Infections caused by microorganisms such as bacteria are the main cause of contagious and deadly disease. New infections with bacterial … Manilkarazapota (sapodilla) is a plant rich in …	https://sipakaril.ipb.ac.id/Files/894aff70-14b5-4de1-814e-bb16c00b1966/paper_894aff70-14b5-4de1-814e-bb16c00b1966.pdf	https://scholar.google.com/scholar?q=related:353ZchoBF48J:scholar.google.com/&scioq=sapodila+bacterial+infection&hl=en&as_sdt=2007
98	18	B Sharma, I Singh, S Bajar, S Gupta, H Gautam, ...	Biogenic silver nanoparticles: evaluation of their biological and catalytic potential	2020	Indian journal of …	Springer	https://link.springer.com/article/10.1007/s12088-020-00889-0	https://scholar.google.com/scholar?cites=10150629836958659207&as_sdt=2005&sciodt=2007&hl=en	98	2024-07-09 11:44:40		10.1007/s12088-020-00889-0							18	4.5	3	6	4	… and prevent the body from harmful infections [27]. Profound … In present work, we have synthesized MZ (sapodilla) … (90 µg/ml) while extract inhibited bacterial growth by double the …	https://www.ncbi.nlm.nih.gov/pmc/articles/PMC7539258/	https://scholar.google.com/scholar?q=related:h_Jmbg5I3owJ:scholar.google.com/&scioq=sapodila+bacterial+infection&hl=en&as_sdt=2007
99	259	A Borges, AC Abreu, C Dias, MJ Saavedra, F Borges, ...	New perspectives on the use of phytochemicals as an emergent strategy to control bacterial infections including biofilms	2016	Molecules	mdpi.com	https://www.mdpi.com/1420-3049/21/7/877	https://scholar.google.com/scholar?cites=15971377747215889250&as_sdt=2005&sciodt=2007&hl=en	99	2024-07-09 11:44:40	HTML								259	32.38	43	6	8	The majority of current infectious diseases are almost untreatable by conventional antibiotic … -resistant bacteria. The degree of severity and the persistence of infections are worsened …	https://www.mdpi.com/1420-3049/21/7/877	https://scholar.google.com/scholar?q=related:YrNh7HC7pd0J:scholar.google.com/&scioq=sapodila+bacterial+infection&hl=en&as_sdt=2007
100	237	I Castillo-Juárez, T Maeda, ...	Role of quorum sensing in bacterial infections	2015	World Journal of …	ncbi.nlm.nih.gov	https://www.ncbi.nlm.nih.gov/pmc/articles/PMC4517333/	https://scholar.google.com/scholar?cites=6250434024045570455&as_sdt=2005&sciodt=2007&hl=en	100	2024-07-09 11:44:40	HTML								237	26.33	79	3	9	… infections. We focus on two major QS bacterial models, the opportunistic Gram negative bacteria … of nosocomial and wound infections. In addition, QS communication systems in other …	https://www.ncbi.nlm.nih.gov/pmc/articles/PMC4517333/	https://scholar.google.com/scholar?q=related:l2lA76AAvlYJ:scholar.google.com/&scioq=sapodila+bacterial+infection&hl=en&as_sdt=2007
101	21	EM Yahia, F Gutierrez-Orozco	Sapodilla (Manilkara achras (Mill) Fosb., syn Achras sapota L.)	2011	… biology and technology of tropical and …	Elsevier	https://www.sciencedirect.com/science/article/pii/B9780857090904500172	https://scholar.google.com/scholar?cites=15839526368958605999&as_sdt=2005&sciodt=2007&hl=en	101	2024-07-09 11:44:40									21	1.62	11	2	13	… chewing gum, the sapodilla tree is now mainly cultivated for its fruit. Sapodilla fruit present a … -N-1-butylcarbomoyl) as a good control for fungal and bacterial pathogens in sapodilla fruit. …	https://www.researchgate.net/profile/Elhadi-Yahia/publication/277816562_Sapodilla_Manilkara_archas_Mill_Fosb_syn_Achras_sapota_L/links/5a57afb045851529a2edbd5e/Sapodilla-Manilkara-archas-Mill-Fosb-syn-Achras-sapota-L.pdf	https://scholar.google.com/scholar?q=related:r-o1qE9N0dsJ:scholar.google.com/&scioq=sapodila+bacterial+infection&hl=en&as_sdt=2007
102	32	R Majumder, B Sutcliffe, PW Taylor, TA Chapman	Next-Generation Sequencing reveals relationship between the larval microbiome and food substrate in the polyphagous Queensland fruit fly	2019	Scientific reports	nature.com	https://www.nature.com/articles/s41598-019-50602-5	https://scholar.google.com/scholar?cites=13483774354513965907&as_sdt=2005&sciodt=2007&hl=en	102	2024-07-09 11:44:40	HTML								32	6.4	8	4	5	… PERMANOVA tests both indicated that bacteria in sapodilla fruits and larvae did not … bacteria, pathogens have also been reported including Providencia which is able to cause infection …	https://www.nature.com/articles/s41598-019-50602-5	https://scholar.google.com/scholar?q=related:U7NT2FX9H7sJ:scholar.google.com/&scioq=sapodila+bacterial+infection&hl=en&as_sdt=2007
103	0	C REJIL	PRELIMINARY ANALYSIS OF FLORISTIC DIVERSITY IN SELECTED WARDS OF CHERANELLOOR PANCHAYAT	2023		117.239.78.102	http://117.239.78.102:8080/jspui/bitstream/123456789/2754/1/Project%20chelsy%20rejil.pdf		103	2024-07-09 11:44:40	PDF								0	0	0	1	1	… the tropical countries, harbors 54,733 species including species of virus/bacteria and fungi. … Sapodilla can grow to more than 30 m (98 ft) tall with a trunk diameter of up to 1.5 m. The …	http://117.239.78.102:8080/jspui/bitstream/123456789/2754/1/Project%20chelsy%20rejil.pdf	https://scholar.google.com/scholar?q=related:msSQfQjIrukJ:scholar.google.com/&scioq=sapodila+bacterial+infection&hl=en&as_sdt=2007
104	168	S Agriopoulou, E Stamatelopoulou, M Sachadyn-Król, ...	Lactic acid bacteria as antibacterial agents to extend the shelf life of fresh and minimally processed fruits and vegetables: Quality and safety aspects	2020	Microorganisms	mdpi.com	https://www.mdpi.com/2076-2607/8/6/952	https://scholar.google.com/scholar?cites=14045538027365368871&as_sdt=2005&sciodt=2007&hl=en	104	2024-07-09 11:44:40	HTML								168	42	42	4	4	… bacterial infections [84]. … Bacterial-producing LABs were isolated from curd and cow dung samples and were tested on 25 isolated bacterial fruit flora from apple, fig, banana, sapodilla, …	https://www.mdpi.com/2076-2607/8/6/952	https://scholar.google.com/scholar?q=related:J4RaYGvG68IJ:scholar.google.com/&scioq=sapodila+bacterial+infection&hl=en&as_sdt=2007
105	15	MS Khan, FA Qais, I Ahmad	Quorum sensing interference by natural products from medicinal plants: Significance in combating bacterial infection	2018	Biotechnological applications of quorum …	Springer	https://link.springer.com/chapter/10.1007/978-981-10-9026-4_20	https://scholar.google.com/scholar?cites=7235269717516799555&as_sdt=2005&sciodt=2007&hl=en	105	2024-07-09 11:44:40		10.1007/978-981-10-9026-4_20							15	2.5	5	3	6	… Aqueous extract of fruits of Ananas comosus (pineapple) and Manilkara zapota (sapodilla) were found to inhibit the QS system in Chromobacterium violaceum CV026 and P. …		https://scholar.google.com/scholar?q=related:Q866VnnXaGQJ:scholar.google.com/&scioq=sapodila+bacterial+infection&hl=en&as_sdt=2007
106	0	WF van den Bosch	Composition for the treatment or prevention of infections and inflammations	2022	US Patent App. 17/424,208	Google Patents	https://patents.google.com/patent/US20220117910A1/en		106	2024-07-09 11:44:40									0	0	0	1	2	… Such bacterial infections and inflammations are commonly treated with antibiotics or disinfectants such as chlorohexidine. These compounds however also lead to disturbance of the …	https://patentimages.storage.googleapis.com/c3/9f/71/715b0716fc90c5/US20220117910A1.pdf	https://scholar.google.com/scholar?q=related:v7PjTZYx9MYJ:scholar.google.com/&scioq=sapodila+bacterial+infection&hl=en&as_sdt=2007
107	0	ID Efendi, SP Awang Maharijaya	Proceeding International Seminar on Tropical Horticulture 2016: The Future of Tropical Horticulture		researchgate.net		https://www.researchgate.net/profile/Sari-Nurulita-4/publication/320345133_Disease_Incidence_and_Molecular_Analysis_of_Banana_Bunchy_Top_Virus_in_Bogor_West_Java/links/59deea38aca27247d794abb3/Disease-Incidence-and-Molecular-Analysis-of-Banana-Bunchy-Top-Virus-in-Bogor-West-Java.pdf		107	2024-07-09 11:44:40	PDF								0	0	0	2		… Initiation of sapodilla’shoots by in vitro propagation has been widely reported but in … sapodilla still limited report. The aim of this research was to in vitro multiplication of shoot of sapodilla …	https://www.researchgate.net/profile/Sari-Nurulita-4/publication/320345133_Disease_Incidence_and_Molecular_Analysis_of_Banana_Bunchy_Top_Virus_in_Bogor_West_Java/links/59deea38aca27247d794abb3/Disease-Incidence-and-Molecular-Analysis-of-Banana-Bunchy-Top-Virus-in-Bogor-West-Java.pdf	https://scholar.google.com/scholar?q=related:66HwRKeQUW0J:scholar.google.com/&scioq=sapodila+bacterial+infection&hl=en&as_sdt=2007
108	156	S Mohamed, S Saka, SH El‐Sharkawy, AM Ali, ...	Antimycotic screening of 58 Malaysian plants against plant pathogens	1996	Pesticide …	Wiley Online Library	https://onlinelibrary.wiley.com/doi/abs/10.1002/(sici)1096-9063(199607)47:3%3C259::aid-ps413%3E3.0.co;2-n	https://scholar.google.com/scholar?cites=14555023788285779893&as_sdt=2005&sciodt=2007&hl=en	108	2024-07-09 11:44:40		10.1002/(sici)1096-9063(199607)47:3%3C259::aid-ps413%3E3.0.co;2-n							156	5.57	31	5	28	… activity, which explains why plants are more resistant to bacterial attack than to fungal attack^.^ This … Post-harvest infection on fruits limits the storage life and hinders the development of …		https://scholar.google.com/scholar?q=related:tV8iBgXV_ckJ:scholar.google.com/&scioq=sapodila+bacterial+infection&hl=en&as_sdt=2007
109	9	M Fomani, AB Nouga, FAA Toze, JC Ndom, ...	Bioactive Phenylethanoids from the Seeds of Manilkara zapota	2015	J Pharm Res …	researchgate.net	https://www.researchgate.net/profile/Flavien-Toze/publication/275647513_Taraxastane_and_Lupane_Triterpenoids_from_the_Bark_of_Manilkara_zapota/links/5617edce08ae044edbacfb83/Taraxastane-and-Lupane-Triterpenoids-from-the-Bark-of-Manilkara-zapota.pdf	https://scholar.google.com/scholar?cites=15276094199928926013&as_sdt=2005&sciodt=2007&hl=en	109	2024-07-09 11:44:40	PDF								9	1	2	5	9	… compounds against cancer and bacterial infections is a crucial … commonly as “Sapodilla”, is an evergreen tree up to 10 m high. … Sapodilla fruit is often eaten fresh, but the pulp is also …	https://www.researchgate.net/profile/Flavien-Toze/publication/275647513_Taraxastane_and_Lupane_Triterpenoids_from_the_Bark_of_Manilkara_zapota/links/5617edce08ae044edbacfb83/Taraxastane-and-Lupane-Triterpenoids-from-the-Bark-of-Manilkara-zapota.pdf	https://scholar.google.com/scholar?q=related:PS8rFr2W_9MJ:scholar.google.com/&scioq=sapodila+bacterial+infection&hl=en&as_sdt=2007
110	2	F Panhwar	The use of biotechnology in Sindh, Pakistan to improve Agriculture, its growth and bring sustainable development in the country	2004	Panhwar Fruit Farm, Sindh, Pakistan	internetchemistry.com	https://www.internetchemistry.com/publications/farzana_panhwar/biotechnology-use-in-sindh-pakistan.pdf	https://scholar.google.com/scholar?cites=718631014128953486&as_sdt=2005&sciodt=2007&hl=en	110	2024-07-09 11:44:40	PDF								2	0.1	2	1	20	… bacterial infections, better physiological feature against malformation, internal fruit breakdown and softening of fruits, all fruits have early maturation, with good food processing qualities. …	https://www.internetchemistry.com/publications/farzana_panhwar/biotechnology-use-in-sindh-pakistan.pdf	https://scholar.google.com/scholar?q=related:jii8kRkX-QkJ:scholar.google.com/&scioq=sapodila+bacterial+infection&hl=en&as_sdt=2007
111	18	F Toze, M Fomani, A Nouga, ...	Taraxastane and lupane triterpenoids from the bark of Manilkara zapota	2015	… Journal of Pure …	publish.journalgazett.co.in	http://publish.journalgazett.co.in/id/eprint/1437/	https://scholar.google.com/scholar?cites=7685236994972679299&as_sdt=2005&sciodt=2007&hl=en	111	2024-07-09 11:44:40									18	2	5	4	9	… compounds against cancer and bacterial infections is a crucial … commonly as “Sapodilla”, is an evergreen tree up to 10 m high. … Sapodilla fruit is often eaten fresh, but the pulp is also …	http://publish.journalgazett.co.in/id/eprint/1437/1/Toze742015IRJPAC17436.pdf	https://scholar.google.com/scholar?q=related:g3wJLFRyp2oJ:scholar.google.com/&scioq=sapodila+bacterial+infection&hl=en&as_sdt=2007
112	9	NA Mohd Israfi, MIA Mohd Ali, S Manickam, ...	Essential oils and plant extracts for tropical fruits protection: From farm to table	2022	Frontiers in Plant …	frontiersin.org	https://www.frontiersin.org/articles/10.3389/fpls.2022.999270/full	https://scholar.google.com/scholar?cites=16951435814091060255&as_sdt=2005&sciodt=2007&hl=en	112	2024-07-09 11:44:40	HTML	10.3389/fpls.2022.999270							9	4.5	2	4	2	… can be effective at preventing fungal and bacterial infections, as well as controlling crop … the shelf life and preserve sapodilla during storage. Treated sapodilla recorded 9.3% weight loss…	https://www.frontiersin.org/articles/10.3389/fpls.2022.999270/full	https://scholar.google.com/scholar?q=related:H3S7cw-ZP-sJ:scholar.google.com/&scioq=sapodila+bacterial+infection&hl=en&as_sdt=2007
113	0	M Pathania	Some wonder fruits	2014					113	2024-07-09 11:44:40	CITATION								0	0	0	1	10			https://scholar.google.com/scholar?q=related:K1wlRgiakMAJ:scholar.google.com/&scioq=sapodila+bacterial+infection&hl=en&as_sdt=2007
114	0	TH Hasan	Article rating		researchgate.net		https://www.researchgate.net/profile/Thualfakar-Hasan/publication/375690352_Sinus_Bacterial_Infections/links/65563c7f3fa26f66f4073474/Sinus-Bacterial-Infections.pdf		114	2024-07-09 11:44:40	PDF								0	0	0	1		… Two issues that might arise from sinus bacterial infections are the spread of infection to … symptoms such as sneezing, runny noses, and watery eyes are Allium cepa and Sapodilla …	https://www.researchgate.net/profile/Thualfakar-Hasan/publication/375690352_Sinus_Bacterial_Infections/links/65563c7f3fa26f66f4073474/Sinus-Bacterial-Infections.pdf	https://scholar.google.com/scholar?q=related:POWl8Q7it_kJ:scholar.google.com/&scioq=sapodila+bacterial+infection&hl=en&as_sdt=2007
115	26	V Dengle-Pulate, J Joshi, S Bhagwat, ...	Application of sophorolipids synthesized using lauryl alcohol as a germicide and fruit-vegetable wash	2014	World Journal of …	academia.edu	https://www.academia.edu/download/45899842/APPLICATION_OF_SOPHOROLIPIDS_SYNTHESIZED20160523-12942-at2zeh.pdf	https://scholar.google.com/scholar?cites=6306595168617767306&as_sdt=2005&sciodt=2007&hl=en	115	2024-07-09 11:44:40	PDF								26	2.6	7	4	10	… inhibition property against gram positive bacteria but so far, very … as test samples such as chikoos (sapodilla), tomatoes, lemons, … which were studied for bacterial infection in plants …	https://www.academia.edu/download/45899842/APPLICATION_OF_SOPHOROLIPIDS_SYNTHESIZED20160523-12942-at2zeh.pdf	https://scholar.google.com/scholar?q=related:iiGoX-SGhVcJ:scholar.google.com/&scioq=sapodila+bacterial+infection&hl=en&as_sdt=2007
116	43	G Onivogui, R Letsididi, M Diaby, L Wang, ...	Influence of extraction solvents on antioxidant and antimicrobial activities of the pulp and seed of Anisophyllea laurina R. Br. ex Sabine fruits	2016	Asian Pacific Journal of …	Elsevier	https://www.sciencedirect.com/science/article/pii/S2221169115002476	https://scholar.google.com/scholar?cites=8795578418077871881&as_sdt=2005&sciodt=2007&hl=en	116	2024-07-09 11:44:40	HTML								43	5.38	9	5	8	… results support that these plant extracts can be used for the treatment of bacterial infections. … higher than those obtained in other fruit species such as sapodilla (13.5 mg of GAE/100 g), …	https://www.sciencedirect.com/science/article/pii/S2221169115002476	https://scholar.google.com/scholar?q=related:Ca-fY_grEHoJ:scholar.google.com/&scioq=sapodila+bacterial+infection&hl=en&as_sdt=2007
117	0	G Kishore, GDA PremChand	PREPARATION AND EVALUATION OF POLYHERBAL ANTIFUNGAL CREAM		jcdronline.org		https://jcdronline.org/admin/Uploads/Files/62480f48e747c9.99451950.pdf		117	2024-07-09 11:44:40	PDF								0	0	0	2		… for new drugs to treat fungal infection is ongoing. The aim of … Soap nut powder is a very good anti bacterial and anti fungal … The sapodilla trees yield fruit twice a year, through flowering …	https://jcdronline.org/admin/Uploads/Files/62480f48e747c9.99451950.pdf	https://scholar.google.com/scholar?q=related:OKBidC7c_kUJ:scholar.google.com/&scioq=sapodila+bacterial+infection&hl=en&as_sdt=2007
118	156	S Liu, X Liu, Y Ren, P Wang, Y Pu, R Yang, ...	Mussel-inspired dual-cross-linking hyaluronic acid/ε-polylysine hydrogel with self-healing and antibacterial properties for wound healing	2020	… applied materials & …	ACS Publications	https://pubs.acs.org/doi/abs/10.1021/acsami.0c00782	https://scholar.google.com/scholar?cites=13868043754678078563&as_sdt=2005&sciodt=2007&hl=en	118	2024-07-09 11:44:40		10.1021/acsami.0c00782							156	39	22	7	4	… (41) This antibacterial property was beneficial to the in vivo experiment on the animals to prevent the risk of bacterial infection. When the bacteria were killed, their membrane surface …		https://scholar.google.com/scholar?q=related:Y0wpn1EwdcAJ:scholar.google.com/&scioq=sapodila+bacterial+infection&hl=en&as_sdt=2007
119	0	SS Poongavanam, V Subramaniyan, PS Sellamuthu, ...	Fabrication of Bio-Nanocomposite Packaging Films with PVA, MMt Clay Nanoparticles, CNCs, and Essential Oils for the Postharvest Preservation of Sapota …	2023	Polymers	mdpi.com	https://www.mdpi.com/2073-4360/15/17/3589		119	2024-07-09 11:44:40	HTML								0	0	0	4	1	… Decay incidence of sapodilla fruit during storage for 12 days. The lower-case letters indicate … Decay incidence of sapodilla fruit during storage for 12 days. The lower-case letters indicate …	https://www.mdpi.com/2073-4360/15/17/3589	https://scholar.google.com/scholar?q=related:FQAZCGfoVjIJ:scholar.google.com/&scioq=sapodila+bacterial+infection&hl=en&as_sdt=2007
120	10	I Patellongi, AD Susanto, AA Islam, ...	The changes of HIF-1α and ICAM-1 expression after Miana (coleus Scutellariodes [L]) treatment in Balb/C mice with Mycobacterium tuberculosis infection	2022	Biomedical & …	pdfs.semanticscholar.org	https://pdfs.semanticscholar.org/ac39/c76ccbc97f0efa419352f345caa48098321c.pdf	https://scholar.google.com/scholar?cites=8637096560090693782&as_sdt=2005&sciodt=2007&hl=en	120	2024-07-09 11:44:40	PDF								10	5	3	4	2	… role in immune response to bacterial infection. M.tuberculosis infection triggers the host’s … on HIF-1á and ICAM-1 in M.tuberculosis infection. This can be useful to find out how the …	https://pdfs.semanticscholar.org/ac39/c76ccbc97f0efa419352f345caa48098321c.pdf	https://scholar.google.com/scholar?q=related:lkD0Yo8h3XcJ:scholar.google.com/&scioq=sapodila+bacterial+infection&hl=en&as_sdt=2007
121	2	M Ali, M Akbar, HJ Chaudhary, MFH Munis	Concurrent application of bacterial-mediated and mycosynthesized ZnO nanofungicides to maintain high ascorbic acid and delay postharvest decay of apricot	2023	Microbial Pathogenesis	Elsevier	https://www.sciencedirect.com/science/article/pii/S0882401023002401	https://scholar.google.com/scholar?cites=7376288366570965835&as_sdt=2005&sciodt=2007&hl=en	121	2024-07-09 11:44:40									2	2	1	4	1	… , softening and fungal infections and its postharvest storage … may cause cancer, liver infections and acute poisoning [5]. … utilization of living entities specifically bacteria and fungi [15]. …		https://scholar.google.com/scholar?q=related:SwtPKjDXXWYJ:scholar.google.com/&scioq=sapodila+bacterial+infection&hl=en&as_sdt=2007
122	4	M Akhter Akhi, A Banik, O Ghurnee, ...	Prevalence and antibiogram profiling of rotten fruits from different areas of Dhaka city, Bangladesh	2020	… of Medicinal Plants	ebooks.manu2sent.com	http://ebooks.manu2sent.com/id/eprint/424/	https://scholar.google.com/scholar?cites=1726025471690560619&as_sdt=2005&sciodt=2007&hl=en	122	2024-07-09 11:44:40									4	1	1	4	4	… , lotkon (Burmese grape), custard apple, sapodilla (safeda) and melon are some of the other … of bacterial infections caused by fruits. In this present study, 10 different bacterial spices …	http://ebooks.manu2sent.com/id/eprint/424/1/Das3042019EJMP53329.pdf	https://scholar.google.com/scholar?q=related:a1RkiQUT9BcJ:scholar.google.com/&scioq=sapodila+bacterial+infection&hl=en&as_sdt=2007
123	32	M Singer, N Bulled	Interlocked infections: the health burdens of syndemics of neglected tropical diseases	2012	Annals of Anthropological Practice	Wiley Online Library	https://anthrosource.onlinelibrary.wiley.com/doi/abs/10.1111/napa.12007	https://scholar.google.com/scholar?cites=70558032040888398&as_sdt=2005&sciodt=2007&hl=en	123	2024-07-09 11:44:40		10.1111/napa.12007							32	2.67	16	2	12	… with interactions involving a secondary bacterial infection caused by the Wolbachia bacterial species. Wolbachia may be the most common infectious bacteria on earth (Singer 2009), …	https://www.academia.edu/download/88102631/napa.1200720220629-1-7svv8t.pdf	https://scholar.google.com/scholar?q=related:TgjZAyis-gAJ:scholar.google.com/&scioq=sapodila+bacterial+infection&hl=en&as_sdt=2007
124	105	P Truchado, M Larrosa, I Castro-Ibáñez, ...	Plant food extracts and phytochemicals: their role as quorum sensing inhibitors	2015	Trends in Food Science & …	Elsevier	https://www.sciencedirect.com/science/article/pii/S0924224415000515	https://scholar.google.com/scholar?cites=10018683355406202236&as_sdt=2005&sciodt=2007&hl=en	124	2024-07-09 11:44:40									105	11.67	26	4	9	… bacterial infections, for whom a diet enriched in QSI might show prophylactic properties. According to this, Truchado, Giménez-Bastida, et al. (2012) showed that a natural orange extract …	https://biblio.ugent.be/publication/7045363/file/7045369	https://scholar.google.com/scholar?q=related:fPUaNG6DCYsJ:scholar.google.com/&scioq=sapodila+bacterial+infection&hl=en&as_sdt=2007
125	5	FF Taufik, R Natzir, I Patellongi, A Santoso, ...	In vivo and in vitro inhibition effect of propolis on Klebsiella pneumoniae: A review	2022	Annals of Medicine and …	Elsevier	https://www.sciencedirect.com/science/article/pii/S2049080122011487	https://scholar.google.com/scholar?cites=2606989868868900065&as_sdt=2005&sciodt=2007&hl=en	125	2024-07-09 11:44:40	HTML								5	2.5	1	5	2	… Models of acute lung inflammation are necessary for advancing our understanding of bacterial infection in humans. Propolis contains over 200 active compounds showing clinical …	https://www.sciencedirect.com/science/article/pii/S2049080122011487	https://scholar.google.com/scholar?q=related:4RT5KnnjLSQJ:scholar.google.com/&scioq=sapodila+bacterial+infection&hl=en&as_sdt=2007
126	5	NS Ghotge, SR Ramdas	Plants used in animal care	2008		anthra.org	http://www.anthra.org/wp-content/uploads/2016/11/Plants-Used-in-Animal-Care-Anthra.pdf	https://scholar.google.com/scholar?cites=3719542223320785078&as_sdt=2005&sciodt=2007&hl=en	126	2024-07-09 11:44:40	BOOK								5	0.31	3	2	16	When we began our research on documenting treatments used by local communities, our underlying assumption was that we would bring out a book on traditional treatments and …	http://www.anthra.org/wp-content/uploads/2016/11/Plants-Used-in-Animal-Care-Anthra.pdf	https://scholar.google.com/scholar?q=related:tiAa9PF3njMJ:scholar.google.com/&scioq=sapodila+bacterial+infection&hl=en&as_sdt=2007
127	0	LS Siang, A Selvaraj, NZ Yi, M Palanisamy, ...	Malaysian Journal of Microbiology						127	2024-07-09 11:44:40	CITATION								0	0	0	5				https://scholar.google.com/scholar?q=related:5fanLjeteVcJ:scholar.google.com/&scioq=sapodila+bacterial+infection&hl=en&as_sdt=2007
128	8	HH Idrus, HM Budu	Biological effects of tumor necrosis factor alpha (TNF-α) in systemic inflammation	2020	Int. J. Med. Sci. Dent. Res	researchgate.net	https://www.researchgate.net/profile/Hasta-Idrus-2/publication/343478875_Jurnal_TNFa_2020_Copernicuspdf/data/5f2bfb26299bf13404a67371/Jurnal-TNFa-2020-Copernicus.pdf	https://scholar.google.com/scholar?cites=5695401691006449329&as_sdt=2005&sciodt=2007&hl=en	128	2024-07-09 11:44:40	PDF								8	2	4	2	4	… a bacterial infection. Background. TNF-α plays a role in host defense for bacterial, viral and parasitic infections… often found in conditions of inflammation and infection in the serum. TNF-α …	https://www.researchgate.net/profile/Hasta-Idrus-2/publication/343478875_Jurnal_TNFa_2020_Copernicuspdf/data/5f2bfb26299bf13404a67371/Jurnal-TNFa-2020-Copernicus.pdf	https://scholar.google.com/scholar?q=related:sTaZlakhCk8J:scholar.google.com/&scioq=sapodila+bacterial+infection&hl=en&as_sdt=2007
129	0	MP Roy, MD Adhikari, BK Tiwary	Phytocompound-Mediated Inhibition of Quorum-Sensing Cascade in Pathogenic Bacteria	2024	Natural Products	taylorfrancis.com	https://www.taylorfrancis.com/chapters/edit/10.1201/9781003300557-5/phytocompound-mediated-inhibition-quorum-sensing-cascade-pathogenic-bacteria-roy-adhikari-tiwary		129	2024-07-09 11:44:40		10.1201/9781003300557-5							0	0	0	3	1	… contribute to the effective development of bacterial infections, especially in production of … microbial invasion and infection, strategically thwarting bacterial adaptation towards resistance, …		https://scholar.google.com/scholar?q=related:kt71CnVx4_gJ:scholar.google.com/&scioq=sapodila+bacterial+infection&hl=en&as_sdt=2007
130	3	S Indhumathi, KS Kumar	A review on medicated chewing gum and its role in mouth ulcers	2020	Research Journal of Pharmacy and …	indianjournals.com	https://www.indianjournals.com/ijor.aspx?target=ijor:rjpt&volume=13&issue=1&article=093	https://scholar.google.com/scholar?cites=1177497381621769584&as_sdt=2005&sciodt=2007&hl=en	130	2024-07-09 11:44:40									3	0.75	2	2	4	… of a bacterial infection; some medicines may speed up the healing if used early enough. … One thousand years ago, the Mayan Indians chewed tree resin from the sapodilla tree in order …		https://scholar.google.com/scholar?q=related:cKWEQ6FPVxAJ:scholar.google.com/&scioq=sapodila+bacterial+infection&hl=en&as_sdt=2007
131	1	D Pramono, S Supratikno, IND Artika, ...	One Health Approach in the Understanding of Possible Diseases Transmission by Fruits Bats	2017	… Conference in One …	atlantis-press.com	https://www.atlantis-press.com/proceedings/icoh-17/25892368	https://scholar.google.com/scholar?cites=2641061089340330467&as_sdt=2005&sciodt=2007&hl=en	131	2024-07-09 11:44:40									1	0.14	0	4	7	… The plantation were cottonwood tree, guava tree, sapodilla … among the bats such as parasite, bacteria and virus. Based on the … There was are port that humans were infected by Marburg …	https://www.atlantis-press.com/article/25892368.pdf	https://scholar.google.com/scholar?q=related:45E8XBHvpiQJ:scholar.google.com/&scioq=sapodila+bacterial+infection&hl=en&as_sdt=2007
132	0	TBL Tan BeeLing, MEN Mohd Esa Norhaizan	Manilkara zapota (L.) P. Royen leaf water extract triggered apoptosis and activated caspase-dependent pathway in HT-29 human colorectal cancer cell line.	2019		cabidigitallibrary.org	https://www.cabidigitallibrary.org/doi/full/10.5555/20193423993		132	2024-07-09 11:44:40		10.5555/20193423993							0	0	0	2	5	… Royen (Family: Sapotaceae), commonly called as sapodilla, has been applied as traditional folk medicine for diarrhea and pulmonary infections. Conventional therapy in colorectal …		https://scholar.google.com/scholar?q=related:cgwF-eUWecsJ:scholar.google.com/&scioq=sapodila+bacterial+infection&hl=en&as_sdt=2007
133	7	VN Kasim, M Hatta, R Natzir, V Hadju, ...	Effects of lime (Citrus aurantifolia) peel to the expression of mRNA toll-like receptors 4 in balb/c mice-infected Salmonella typhi	2020	Journal of Advanced …	journals.lww.com	https://journals.lww.com/japtr/fulltext/2020/11040/effects_of_lime__citrus_aurantifolia__peel_to_the.3.aspx	https://scholar.google.com/scholar?cites=13278814680900300938&as_sdt=2005&sciodt=2007&hl=en	133	2024-07-09 11:44:40	HTML								7	1.75	1	5	4	… infection through the TLR-4 signaling pathway relationship with the presence of bacterial … typhi bacteria that are in the cell walls of bacteria, it can stimulate the activation of the receptor …	https://journals.lww.com/japtr/fulltext/2020/11040/effects_of_lime__citrus_aurantifolia__peel_to_the.3.aspx	https://scholar.google.com/scholar?q=related:ivBNHZnTR7gJ:scholar.google.com/&scioq=sapodila+bacterial+infection&hl=en&as_sdt=2007
134	1	NG Naga, MI Shaaban	Quorum Sensing and Quorum Sensing Inhibitors of Natural Origin	2023	Drug Discovery and Design Using Natural …	Springer	https://link.springer.com/chapter/10.1007/978-3-031-35205-8_13	https://scholar.google.com/scholar?cites=5992430140433979095&as_sdt=2005&sciodt=2007&hl=en	134	2024-07-09 11:44:40		10.1007/978-3-031-35205-8_13							1	1	1	2	1	… Now, infectious bacteria represent the worldwide health threat. Treatment with antimicrobial … (pineapple), and Manilkara zapota (sapodilla) showed QSI activity against violacein pigment …	https://www.researchgate.net/profile/Nourhan-Naga/publication/373475203_Quorum_Sensing_and_Quorum_Sensing_Inhibitors_of_Natural_Origin/links/64efc161f850d430c36ac2ff/Quorum-Sensing-and-Quorum-Sensing-Inhibitors-of-Natural-Origin.pdf	https://scholar.google.com/scholar?q=related:11bppXZjKVMJ:scholar.google.com/&scioq=sapodila+bacterial+infection&hl=en&as_sdt=2007
135	38	U Amin, MKI Khan, MU Khan, M Ehtasham Akram, ...	Improvement of the Performance of Chitosan—Aloe vera Coatings by Adding Beeswax on Postharvest Quality of Mango Fruit	2021	Foods	mdpi.com	https://www.mdpi.com/2304-8158/10/10/2240	https://scholar.google.com/scholar?cites=15792883765541585491&as_sdt=2005&sciodt=2007&hl=en	135	2024-07-09 11:44:40	HTML								38	12.67	8	5	3	… bacterial infection after 7, 14 and 21 days. Scale was observed as 1 = no decay, 2 = 0–5% decay, 3 = 5–25%, 4 = 25–50%, 5 = 50–75%, 6 = >75%. Percentage of fungal and bacterial …	https://www.mdpi.com/2304-8158/10/10/2240	https://scholar.google.com/scholar?q=related:U8IjSByYK9sJ:scholar.google.com/&scioq=sapodila+bacterial+infection&hl=en&as_sdt=2007
136	16	R Nautiyal, S Uliana, I Raj, B Shah, ...	Decentralized treatment of grey water by natural coagulants in the presence of coagulation aid	2017	Proceedings of the …	academia.edu	https://www.academia.edu/download/96316153/75fd003ed524cee7de10e6a0f26e086b5c61.pdf	https://scholar.google.com/scholar?cites=7370308062328912084&as_sdt=2005&sciodt=2007&hl=en	136	2024-07-09 11:44:40	PDF								16	2.29	3	5	7	… Sapodilla seeds, and the coagulation aid used was Alum. The coagulation with Sapodilla … High quality seeds, those which are new and not infected with diseases; were selected. The …	https://www.academia.edu/download/96316153/75fd003ed524cee7de10e6a0f26e086b5c61.pdf	https://scholar.google.com/scholar?q=related:1PhPFCKYSGYJ:scholar.google.com/&scioq=sapodila+bacterial+infection&hl=en&as_sdt=2007
137	25	J Toledo, R Rojas, JE Ibarra	Efficiency of Heterorhabditis bacteriophora (Nematoda: Heterorhabditidae) on Anastrepha serpentina (Diptera: Tephritidae) larvae under laboratory …	2006	Florida Entomologist	BioOne	https://bioone.org/journals/florida-entomologist/volume-89/issue-4/0015-4040(2006)89[524:EOHBNH]2.0.CO;2/EFFICIENCY-OF-HETERORHABDITIS-BACTERIOPHORA-NEMATODA--HETERORHABDITIDAE-ON-ANASTREPHA-SERPENTINA/10.1653/0015-4040(2006)89[524:EOHBNH]2.0.CO;2.full	https://scholar.google.com/scholar?cites=14236993383011782388&as_sdt=2005&sciodt=2007&hl=en	137	2024-07-09 11:44:40	HTML	10.1653/0015-4040(2006)89[524:EOHBNH]2.0.CO;2.full							25	1.39	8	3	18	… Once in the host hemocoel, the nematode releases its symbiotic bacterium Photorhabdus … Bioassays were performed on late, mature third instars of the sapote fruit fly with infection units …	https://bioone.org/journals/florida-entomologist/volume-89/issue-4/0015-4040(2006)89[524:EOHBNH]2.0.CO;2/EFFICIENCY-OF-HETERORHABDITIS-BACTERIOPHORA-NEMATODA--HETERORHABDITIDAE-ON-ANASTREPHA-SERPENTINA/10.1653/0015-4040(2006)89[524:EOHBNH]2.0.CO;2.full	https://scholar.google.com/scholar?q=related:9A4BEA32k8UJ:scholar.google.com/&scioq=sapodila+bacterial+infection&hl=en&as_sdt=2007
138	6	F Feroz, M Mori, Y Sakagami	Bacterial and Fungal Loads in Raw Sea Foods, Fruits and Vegetables collected from Dhaka, Bangladesh and the Effect of Heat on its Growth	2016	Bangladesh Journal of …	researchgate.net	https://www.researchgate.net/profile/Farahnaaz-Feroz/publication/330030290_Bacterial_and_Fungal_Loads_in_Raw_Sea_Foods_Fruits_and_Vegetables_collected_from_Dhaka_Bangladesh_and_the_Effect_of_Heat_on_its_Growth/links/6001cc62299bf140889b59e7/Bacterial-and-Fungal-Loads-in-Raw-Sea-Foods-Fruits-and-Vegetables-collected-from-Dhaka-Bangladesh-and-the-Effect-of-Heat-on-its-Growth.pdf	https://scholar.google.com/scholar?cites=18265518839306290439&as_sdt=2005&sciodt=2007&hl=en	138	2024-07-09 11:44:40	PDF								6	0.75	2	3	8	… Food, fruits, vegetables and water are major source of bacterial and fungal transmission1. … Perhaps this has contributed to the recent rise in the number of cases of human infections …	https://www.researchgate.net/profile/Farahnaaz-Feroz/publication/330030290_Bacterial_and_Fungal_Loads_in_Raw_Sea_Foods_Fruits_and_Vegetables_collected_from_Dhaka_Bangladesh_and_the_Effect_of_Heat_on_its_Growth/links/6001cc62299bf140889b59e7/Bacterial-and-Fungal-Loads-in-Raw-Sea-Foods-Fruits-and-Vegetables-collected-from-Dhaka-Bangladesh-and-the-Effect-of-Heat-on-its-Growth.pdf	https://scholar.google.com/scholar?q=related:B4UOB5wofP0J:scholar.google.com/&scioq=sapodila+bacterial+infection&hl=en&as_sdt=2007
139	14	R Marlina, M Hatta, E Sridiana, ...	The effect of miana (coleus scutellariodes [L]) on vascular endothelial growth factor expression in Balb/C mice infected with mycobacterium tuberculosis	2021	Biomedical and …	biomedpharmajournal.org	https://biomedpharmajournal.org/vol14no2/the-effect-of-miana-coleus-scutellariodes-l-on-vascular-endothelial-growth-factor-expression-in-balbc-mice-infected-with-mycobacterium-tuberculosis/	https://scholar.google.com/scholar?cites=17734441356459058299&as_sdt=2005&sciodt=2007&hl=en	139	2024-07-09 11:44:40	HTML								14	4.67	4	4	3	… tuberculosis infection causes inflammation and hypoxia and activates a … the bacteria as well as hypoxia. Miana extract, which contains flavonoids and others, directly acts on the bacteria …	https://biomedpharmajournal.org/vol14no2/the-effect-of-miana-coleus-scutellariodes-l-on-vascular-endothelial-growth-factor-expression-in-balbc-mice-infected-with-mycobacterium-tuberculosis/	https://scholar.google.com/scholar?q=related:eyS93XNkHfYJ:scholar.google.com/&scioq=sapodila+bacterial+infection&hl=en&as_sdt=2007
140	22	NB Turan, GÖ Engin	Quorum quenching	2018	Comprehensive Analytical Chemistry	Elsevier	https://www.sciencedirect.com/science/article/pii/S0166526X18300047	https://scholar.google.com/scholar?cites=14307313791937668863&as_sdt=2005&sciodt=2007&hl=en	140	2024-07-09 11:44:40									22	3.67	11	2	6	… Several examples may be listed to highlight the importance of the enzymatic quenching by AHL lactonases as a novel approach able to interfere with the bacterial infection. For instance…		https://scholar.google.com/scholar?q=related:_-Z9IhfKjcYJ:scholar.google.com/&scioq=sapodila+bacterial+infection&hl=en&as_sdt=2007
141	0	BR Narender, M Rajakumari, B Sukanya, S Harish	Journal of Pharma Research	2012		academia.edu	https://www.academia.edu/download/81203932/JPR-7-1-1-7.pdf		141	2024-07-09 11:44:40	PDF								0	0	0	4	12	… known to causes antibiotic resistant infections. We performed the … gram negative bacteria, gram positive bacteria and fungi. The … on beetroot and sapodilla, antifungal activity on papaya. …	https://www.academia.edu/download/81203932/JPR-7-1-1-7.pdf	https://scholar.google.com/scholar?q=related:P-g4iTTac5wJ:scholar.google.com/&scioq=sapodila+bacterial+infection&hl=en&as_sdt=2007
142	0	M Abony, A Banik, Z Ahmed	Chapter-9 Prevalence, Characterization and Antibiogram Profiling of Fresh Leafy, Salad Vegetables and Rotten Fruits from Different Areas of Dhaka City …	2022	Practices Research	researchgate.net	https://www.researchgate.net/profile/Zakaria-Ahmed-4/publication/359202397_Chapter_-_9_-Prevalence_Characterization_and_Antibiogram_Profiling_of_Fresh_Leafy_Salad_Vegetables_and_Rotten_Fruits_from_Different_Areas_of_Dhaka_City_Bangladesh/links/622df9ac84ce8e5b4d2072b4/Chapter-9-Prevalence-Characterization-and-Antibiogram-Profiling-of-Fresh-Leafy-Salad-Vegetables-and-Rotten-Fruits-from-Different-A…		142	2024-07-09 11:44:40	PDF								0	0	0	3	2	… Fruits are easily contaminated with bacterial pathogens due to cross contamination during … cause of bacterial infections caused by fruits. In this present study, 10 different bacterial spices …	https://www.researchgate.net/profile/Zakaria-Ahmed-4/publication/359202397_Chapter_-_9_-Prevalence_Characterization_and_Antibiogram_Profiling_of_Fresh_Leafy_Salad_Vegetables_and_Rotten_Fruits_from_Different_Areas_of_Dhaka_City_Bangladesh/links/622df9ac84ce8e5b4d2072b4/Chapter-9-Prevalence-Characterization-and-Antibiogram-Profiling-of-Fresh-Leafy-Salad-Vegetables-and-Rotten-Fruits-from-Different-A…	https://scholar.google.com/scholar?q=related:KTM_HN_jnREJ:scholar.google.com/&scioq=sapodila+bacterial+infection&hl=en&as_sdt=2007
143	0	HH Idrus, TE Budu, S Rijal, ZM Rasfayanah, ...	The Role of HMGB1 in the Regulation of Autophagy Mediated by Bacterial Invasion: A Mini Review		jobiost.com		https://www.jobiost.com/article_199026_e007f9bf41a261b54acbc6ea974f9a3d.pdf		143	2024-07-09 11:44:40	PDF								0	0	0	5		… HMGB1 is not only associated with autophagy but also plays a pivotal role in regulating cellular responses during bacterial infections. The aim of this review is to explore and explain the …	https://www.jobiost.com/article_199026_e007f9bf41a261b54acbc6ea974f9a3d.pdf	https://scholar.google.com/scholar?q=related:VLK0fOMkjbgJ:scholar.google.com/&scioq=sapodila+bacterial+infection&hl=en&as_sdt=2007
144	0	S Ravichandran, M Ribeiro, ML Ciavatta	Antifungal potential of marine sponge extract against plant and fish pathogenic fungi	2013		drs.nio.res.in	https://drs.nio.res.in/drs/handle/2264/4608		144	2024-07-09 11:44:40									0	0	0	3	11	… infection, since only the external tissue of fish and eggs are involved a good antibiotic agent can solve most of the major fungal infections. … are second to bacterial infections that cause …	https://drs.nio.res.in/drs/bitstream/handle/2264/4608/Oceanogr_Open_Access_1_1000112.pdf;sequence=1	https://scholar.google.com/scholar?q=related:2-4ScsblXikJ:scholar.google.com/&scioq=sapodila+bacterial+infection&hl=en&as_sdt=2007
145	0	HH Idrus, MH Budu	International Journal of Medical Science and Dental Research	2018	International Journal	researchgate.net	https://www.researchgate.net/profile/Hasta-Idrus-2/publication/343111308_International_Journal_of_Medical_Science_and_Dental_Research_Biological_Effects_of_Tumor_Necrosis_Factor_Alpha_TNF-a_in_Systemic_Inflammation/links/5f17395045851515ef3c32e8/International-Journal-of-Medical-Science-and-Dental-Research-Biological-Effects-of-Tumor-Necrosis-Factor-Alpha-TNF-a-in-Systemic-Inflammation.pdf		145	2024-07-09 11:44:40	PDF								0	0	0	2	6	… bacterial infection. Background. TNF-α plays a role in host defense for bacterial, viral and parasitic infections… is often found in conditions of inflammation and infection in the serum. TNFα …	https://www.researchgate.net/profile/Hasta-Idrus-2/publication/343111308_International_Journal_of_Medical_Science_and_Dental_Research_Biological_Effects_of_Tumor_Necrosis_Factor_Alpha_TNF-a_in_Systemic_Inflammation/links/5f17395045851515ef3c32e8/International-Journal-of-Medical-Science-and-Dental-Research-Biological-Effects-of-Tumor-Necrosis-Factor-Alpha-TNF-a-in-Systemic-Inflammation.pdf	https://scholar.google.com/scholar?q=related:mFFQKO4-aCYJ:scholar.google.com/&scioq=sapodila+bacterial+infection&hl=en&as_sdt=2007
146	171	DJ Yang, SH Moh, DH Son, S You, AW Kinyua, CM Ko, ...	Gallic acid promotes wound healing in normal and hyperglucidic conditions	2016	Molecules	mdpi.com	https://www.mdpi.com/1420-3049/21/7/899	https://scholar.google.com/scholar?cites=10473229179235455454&as_sdt=2005&sciodt=2007&hl=en	146	2024-07-09 11:44:40	HTML								171	21.38	24	7	8	… Diabetic patients often suffer from chronic, impaired wound healing, which facilitate bacterial infections and necessitate amputation. Here, we studied the effects of gallic acid (GA, 3,4,5-…	https://www.mdpi.com/1420-3049/21/7/899	https://scholar.google.com/scholar?q=related:3tGV73JiWJEJ:scholar.google.com/&scioq=sapodila+bacterial+infection&hl=en&as_sdt=2007
147	50	M Wang, J Shi, H Mao, Z Sun, S Guo, J Guo, ...	Fluorescent imidazolium-type poly (ionic liquid) s for bacterial imaging and biofilm inhibition	2019	…	ACS Publications	https://pubs.acs.org/doi/abs/10.1021/acs.biomac.9b00741	https://scholar.google.com/scholar?cites=1161776782678390479&as_sdt=2005&sciodt=2007&hl=en	147	2024-07-09 11:44:40		10.1021/acs.biomac.9b00741							50	10	7	7	5	… Bacterial infections are major global threats to public health, (1) and the emergence of … bacterial infections in the human body. Once established, biofilms can induce persistent infections…		https://scholar.google.com/scholar?q=related:z3bXF9R1HxAJ:scholar.google.com/&scioq=sapodila+bacterial+infection&hl=en&as_sdt=2007
148	140	C Lans, T Harper, K Georges, E Bridgewater	Medicinal plants used for dogs in Trinidad and Tobago	2000	Preventive Veterinary …	Elsevier	https://www.sciencedirect.com/science/article/pii/S0167587700001239	https://scholar.google.com/scholar?cites=11628070537015231128&as_sdt=2005&sciodt=2007&hl=en	148	2024-07-09 11:44:40									140	5.83	35	4	24	… infected with myiasis. Cuts, tick-bite wounds, umbilicus of neonates, and bites from vampire bats were the main sites of the infection in … Sapodilla is a tree fruit. The seeds of the fruit are …	https://www.academia.edu/download/48976525/Medicinal_plants_used_for_dogs_in_Trinid20160919-6862-1pvdwjg.pdf	https://scholar.google.com/scholar?q=related:mIL6lYs0X6EJ:scholar.google.com/&scioq=sapodila+bacterial+infection&hl=en&as_sdt=2007
149	0	MP Srivastava	OUTBREAKS AND NEW RECORDS	1966	FAO Plant Protection Bulletin	Food and Agriculture Organization of …			149	2024-07-09 11:44:40	CITATION								0	0	0	1	58			https://scholar.google.com/scholar?q=related:AN-EIgPoUv0J:scholar.google.com/&scioq=sapodila+bacterial+infection&hl=en&as_sdt=2007
150	11	NZ Yi, A Selvaraj	Isolation, Screening and Characterization of Antibiotic-Producing Actinomycetes From Rhizosphere Region of Different Plants From A Farm of Sungai Ramal Luar …	2017	International Journal of Pharma …	search.ebscohost.com	https://search.ebscohost.com/login.aspx?direct=true&profile=ehost&scope=site&authtype=crawler&jrnl=09753532&AN=131267557&h=njqt86Z%2FtFWdSHsTl2VDQ0OBuYYuAIzEVgExaG%2Bxu5L6c9ICXw7nYQWfg8aoDWYM5xPpXVERg8JXpHPNaTWHeQ%3D%3D&crl=c	https://scholar.google.com/scholar?cites=1437344839230290098&as_sdt=2005&sciodt=2007&hl=en	150	2024-07-09 11:44:40									11	1.57	6	2	7	… the growing proportion of antibiotic-resistant bacterial infections that become untreatable. Hence, … subtilis was observed to be the most susceptible bacteria among the four test bacteria …		https://scholar.google.com/scholar?q=related:svgPEoR58hMJ:scholar.google.com/&scioq=sapodila+bacterial+infection&hl=en&as_sdt=2007
151	1	JR Matchett	A Review of the Use of Plants as Ethno-Veterinary Medical Replacements for Antibiotic Growth Promoters	2002		sappo.org	https://www.sappo.org/wp-content/uploads/2022/09/5_Ethnovet_Review_Matchett.pdf	https://scholar.google.com/scholar?cites=14994222748985186825&as_sdt=2005&sciodt=2007&hl=en	151	2024-07-09 11:44:40	PDF								1	0.05	1	1	22	… The ailments treated with this plant include bacterial and fungal infections, and general pains. This suggests the plant possesses both analgesic as well as anti-microbial properties (…	https://www.sappo.org/wp-content/uploads/2022/09/5_Ethnovet_Review_Matchett.pdf	https://scholar.google.com/scholar?q=related:CdpXvCUuFtAJ:scholar.google.com/&scioq=sapodila+bacterial+infection&hl=en&as_sdt=2007
152	0	S Sultana, D Kundu, A Islam	Antimicrobial Activity of Some Common Fruits in Bangladesh against Six Different Pathogenic Bacteria		suntextreviews.org		https://suntextreviews.org/doi/full/10.51737/2766-4813.2022.066		152	2024-07-09 11:44:40	HTML	10.51737/2766-4813.2022.066							0	0	0	3		… several pathogenic bacteria. … infection agents to control pathogenic microscopic organisms have prompted the spread of the safe strains of microorganisms making treatment of bacterial …	https://suntextreviews.org/doi/full/10.51737/2766-4813.2022.066	https://scholar.google.com/scholar?q=related:qTpcgL76CkoJ:scholar.google.com/&scioq=sapodila+bacterial+infection&hl=en&as_sdt=2007
153	0	MR Usman, MAA Patil, AA Sabe	Formulation Evaluation and Development of Sapota Leaves and Bael Fruit Containing Natural Hair Cleanser	2024	… American Journal of …	actafarmbonaerense.com.ar	http://actafarmbonaerense.com.ar/index.php/latamjpharm/article/view/956		153	2024-07-09 11:44:40									0	0	0	3	1	… your hair from fungal and bacterial infections. Washing hair removes excess … are a result of bacterial infections.[4] (Norwood, et.al 2022) … Sapodilla were purchased from local market and …	http://actafarmbonaerense.com.ar/index.php/latamjpharm/article/download/956/845	https://scholar.google.com/scholar?q=related:bjv0rxvk3U4J:scholar.google.com/&scioq=sapodila+bacterial+infection&hl=en&as_sdt=2007
154	0	S Srivastava	Quorum Sensing: Novel Bacterial Communication	2017	Biotechnology: Recent Trends and Emerging …	taylorfrancis.com	https://www.taylorfrancis.com/chapters/edit/10.1201/9780203711033-2/quorum-sensing-shilpi-srivastava		154	2024-07-09 11:44:40		10.1201/9780203711033-2							0	0	0	1	7	… officinale, ginseng, pineapple, plantain, and sapodilla are being explored as QS inhibitors. … bacteria has further accelerated the finding of novel strategies for treating bacterial infections. …		https://scholar.google.com/scholar?q=related:ZhLmFSaB2RcJ:scholar.google.com/&scioq=sapodila+bacterial+infection&hl=en&as_sdt=2007
155	0	I Castillo-Juárez, T Maeda, EA Mandujano-Tinoco, ...	Name of journal: World Journal of Clinical Cases ESPS Manuscript NO: 14531 Columns		che.psu.edu		http://www.che.psu.edu/faculty/wood/group/publications/pdf/World%20J%20of%20Clinical%20Cases%202015%20Role%20of%20QS%20in%20biofilms.pdf		155	2024-07-09 11:44:40	PDF								0	0	0	4		… system are the main factors that determine the bacterial infectious doses. Hence those … , and sapodilla, was evaluated; most of these extracts showed QQ activity without inhibiting …	http://www.che.psu.edu/faculty/wood/group/publications/pdf/World%20J%20of%20Clinical%20Cases%202015%20Role%20of%20QS%20in%20biofilms.pdf	https://scholar.google.com/scholar?q=related:yKpbDCaY994J:scholar.google.com/&scioq=sapodila+bacterial+infection&hl=en&as_sdt=2007
156	0	M Hatta, I Djaharuddin, I Patellongi, ...	The changes of HIF-1α and ICAM-1 expression after Miana (Coleus scutellariodes [L]) treatment in Balb/c mice with Mycobacterium tuberculosis infection	2022	Biomedical and …	biomedpharmajournal.org	https://biomedpharmajournal.org/vol15no1/the-changes-of-hif-1%CE%B1-and-icam-1-expression-after-miana-coleus-scutellariodes-l-treatment-in-balbc-mice-with-mycobacterium-tuberculosis-infection/		156	2024-07-09 11:44:40	HTML								0	0	0	4	2	… role in immune response to bacterial infection. M.tuberculosis infection triggers the host’s … on HIF-1α and ICAM-1 in M.tuberculosis infection. This can be useful to find out how the …	https://biomedpharmajournal.org/vol15no1/the-changes-of-hif-1%CE%B1-and-icam-1-expression-after-miana-coleus-scutellariodes-l-treatment-in-balbc-mice-with-mycobacterium-tuberculosis-infection/	https://scholar.google.com/scholar?q=related:7lurb_V29G8J:scholar.google.com/&scioq=sapodila+bacterial+infection&hl=en&as_sdt=2007
157	308	M Rahmatullah, A Noman, MS Hossan, ...	A survey of medicinal plants in two areas of Dinajpur district, Bangladesh including plants which can be used as functional foods	2009	… Eurasian Journal of …	academia.edu	https://www.academia.edu/download/83527094/A_Survey_of_Medicinal_Plants_in_Two_Area20220408-22689-1y3e2ky.pdf	https://scholar.google.com/scholar?cites=2491195170413044635&as_sdt=2005&sciodt=2007&hl=en	157	2024-07-09 11:44:40	PDF								308	20.53	77	4	15	… Leaf juice is also used for bacterial infections. Leaf and flower juice is taken on a regular … diseases and diseases arising from bacterial, viral and fungal infections. Two plants appear …	https://www.academia.edu/download/83527094/A_Survey_of_Medicinal_Plants_in_Two_Area20220408-22689-1y3e2ky.pdf	https://scholar.google.com/scholar?q=related:m2Oj_s6AkiIJ:scholar.google.com/&scioq=sapodila+bacterial+infection&hl=en&as_sdt=2007
158	0	GG Babaniyi, BR Babaniyi, UJ Akor	Antipseudomonal Therapy and Quorum Quenching: A Prospective Marker	2023		books.rsc.org	https://books.rsc.org/books/edited-volume/2145/chapter/7776763		158	2024-07-09 11:44:40									0	0	0	3	1	… Due to the increased antibiotic resistance among the human bacterial pathogens and the current poor effects of antibiotics to treat bacterial infections, novel alternative antimicrobial …		https://scholar.google.com/scholar?q=related:JhxJ0Dth3lYJ:scholar.google.com/&scioq=sapodila+bacterial+infection&hl=en&as_sdt=2007
159	37	HA Bess	The green scale, Coccus viridis (Green)(Homoptera: Coccidae), and ants	1957		scholarspace.manoa.hawaii.edu	https://scholarspace.manoa.hawaii.edu/bitstreams/1d38158f-cf7d-49b8-a976-883b6cf4dc3c/download	https://scholar.google.com/scholar?cites=12876165052823378118&as_sdt=2005&sciodt=2007&hl=en	159	2024-07-09 11:44:40	PDF								37	0.55	37	1	67	… a nearby coffee tree and a sapodilla tree, Achras sapota Mill., … the samples taken from the sapodilla tree on February 7 and … evidence of being infected with bacteria or fungi. Within a few …	https://scholarspace.manoa.hawaii.edu/bitstreams/1d38158f-cf7d-49b8-a976-883b6cf4dc3c/download	https://scholar.google.com/scholar?q=related:xhjWCuVTsbIJ:scholar.google.com/&scioq=sapodila+bacterial+infection&hl=en&as_sdt=2007
160	2	J Toledo, BM Morán-Aceves, JE Ibarra, P Liedo	Can Entomopathogenic Nematodes and Their Symbiotic Bacteria Suppress Fruit Fly Pests? A Review	2023	Microorganisms	mdpi.com	https://www.mdpi.com/2076-2607/11/7/1682	https://scholar.google.com/scholar?cites=654153971219216891&as_sdt=2005&sciodt=2007&hl=en	160	2024-07-09 11:44:40	HTML								2	2	1	4	1	… bacteria, causing a type of septicemia (putrefaction of fatty tissue) and consequent death of the host within two to three days following infection [… citrus, guava, and sapodilla, among other …	https://www.mdpi.com/2076-2607/11/7/1682	https://scholar.google.com/scholar?q=related:-7nuKpIFFAkJ:scholar.google.com/&scioq=sapodila+bacterial+infection&hl=en&as_sdt=2007
161	0	FL Milleningrum, A Gunadi, YMD Arina	Antibacterial effect of celery leaf extract (Apium graveolens L.) against Staphylococcus aureus in vitro	2023		oraljournal.com	https://www.oraljournal.com/pdf/2023/vol9issue2/PartC/9-2-26-757.pdf		161	2024-07-09 11:44:40	PDF								0	0	0	3	1	… Staphylococcus aureus is a bacterium that causes various oral infections. Infections caused by S. … In vitro test of the inhibition of sapodilla leaf extract against Escherichia coli bacteria. …	https://www.oraljournal.com/pdf/2023/vol9issue2/PartC/9-2-26-757.pdf	https://scholar.google.com/scholar?q=related:AwrH7Vb2-y8J:scholar.google.com/&scioq=sapodila+bacterial+infection&hl=en&as_sdt=2007
162	9	P Viswanathan, P Rathinam, SC Suneeva	Plant quorum sensing inhibitors: food, medicinal plants, and others	2015	… : a battle with no end in sight	Springer	https://link.springer.com/chapter/10.1007/978-81-322-1982-8_22	https://scholar.google.com/scholar?cites=6579973658047257096&as_sdt=2005&sciodt=2007&hl=en	162	2024-07-09 11:44:40		10.1007/978-81-322-1982-8_22							9	1	3	3	9	… high bacterial density were long suspected to have protective mechanisms against infections. … (sapodilla) proved to be QSI against violacein production by C. violaceum and pyocyanin …		https://scholar.google.com/scholar?q=related:CJpVBy7DUFsJ:scholar.google.com/&scioq=sapodila+bacterial+infection&hl=en&as_sdt=2007
163	15	M Banakar, S Moayedi, E Shamsoddin, ...	Chewing gums as a drug delivery approach for oral health	2022	… Journal of Dentistry	Wiley Online Library	https://onlinelibrary.wiley.com/doi/abs/10.1155/2022/9430988	https://scholar.google.com/scholar?cites=8435863272856143503&as_sdt=2005&sciodt=2007&hl=en	163	2024-07-09 11:44:40		10.1155/2022/9430988							15	7.5	4	4	2	… Chicle from the Sapodilla tree was sold like chewing gum for the first time in 1848. In 1869, … likely to develop bacterial or fungal infections of the mouth. Dental and oral infections can be …	https://onlinelibrary.wiley.com/doi/pdf/10.1155/2022/9430988	https://scholar.google.com/scholar?q=related:j8ZamPM0EnUJ:scholar.google.com/&scioq=sapodila+bacterial+infection&hl=en&as_sdt=2007
164	1	R Majumder	Dynamics of the Queensland fruit fly microbiome under changes in host environment	2022		figshare.mq.edu.au	https://figshare.mq.edu.au/articles/thesis/Dynamics_of_the_Queensland_fruit_fly_microbiome_under_changes_in_host_environment/19439174	https://scholar.google.com/scholar?cites=9563240907921871954&as_sdt=2005&sciodt=2007&hl=en	164	2024-07-09 11:44:40									1	0.5	1	1	2	… study comprehensively characterized the bacterial and fungal … to harbour a diverse array of bacteria and fungi. The fungal … In contrast, the larval bacterial microbiome is related less to …	https://figshare.mq.edu.au/articles/thesis/Dynamics_of_the_Queensland_fruit_fly_microbiome_under_changes_in_host_environment/19439174/1/files/34537664.pdf	https://scholar.google.com/scholar?q=related:UtQqAvB0t4QJ:scholar.google.com/&scioq=sapodila+bacterial+infection&hl=en&as_sdt=2007
165	9	N Bletter, M Satdichan, L Sounthala, ...	Plants up for adoption: Why do Southeast Asians so readily accept introduced plants into use, especially those from the Neotropics	2010	Proceedings of the …	seaga.xtreemhost.com	http://seaga.xtreemhost.com/seaga2010/CS1B-Bletter.pdf	https://scholar.google.com/scholar?cites=10998653909502639923&as_sdt=2005&sciodt=2007&hl=en	165	2024-07-09 11:44:40	PDF								9	0.64	2	4	14	… bacterial infections. Plant species that are determined to be most effective and most central to a culture can be targeted by conservation organizations for triage in Thailand and Lao PDR…	http://seaga.xtreemhost.com/seaga2010/CS1B-Bletter.pdf	https://scholar.google.com/scholar?q=related:M79dE3URo5gJ:scholar.google.com/&scioq=sapodila+bacterial+infection&hl=en&as_sdt=2007
166	2	PK Khatri, S Sharma	Microbial examination for spoil fruits and vegetables and its isolation, identification, and antimicrobial sensitivity pattern	2018	International Journal of Current Microbiology and …			https://scholar.google.com/scholar?cites=7148589569313101648&as_sdt=2005&sciodt=2007&hl=en	166	2024-07-09 11:44:40	CITATION								2	0.33	1	2	6			https://scholar.google.com/scholar?q=related:UFf4o1bkNGMJ:scholar.google.com/&scioq=sapodila+bacterial+infection&hl=en&as_sdt=2007
167	1	R Terhem, NIM Alias, ...	Preliminary study of canker disease for development of urban tree health standard in Malaysia	2021	IOP Conference Series …	iopscience.iop.org	https://iopscience.iop.org/article/10.1088/1755-1315/918/1/012037/meta	https://scholar.google.com/scholar?cites=8206259061776586885&as_sdt=2005&sciodt=2007&hl=en	167	2024-07-09 11:44:40		10.1088/1755-1315/918/1/012037							1	0.33	0	3	3	… bacteria infected Terminalia mantaly near KLCC area while the tree is also associated with termites’ infestation. Causal bacteria … trunk was caused by bacterial infection. Slime flux was …	https://iopscience.iop.org/article/10.1088/1755-1315/918/1/012037/pdf	https://scholar.google.com/scholar?q=related:hRgGWCN94nEJ:scholar.google.com/&scioq=sapodila+bacterial+infection&hl=en&as_sdt=2007
168	82	C Kamaraj, G Rajakumar, AA Rahuman, ...	Feeding deterrent activity of synthesized silver nanoparticles using Manilkara zapota leaf extract against the house fly, Musca domestica (Diptera: Muscidae)	2012	Parasitology …	Springer	https://link.springer.com/article/10.1007/s00436-011-2689-5	https://scholar.google.com/scholar?cites=9813243547756531452&as_sdt=2005&sciodt=2007&hl=en	168	2024-07-09 11:44:40		10.1007/s00436-011-2689-5							82	6.83	21	4	12	… They are mechanical carriers of more than hundred human and animal intestinal diseases and are responsible for protozoan, bacterial, helminthic, and viral infections. The present work …	https://www.researchgate.net/profile/Velayutham-Kanayairam/publication/216900051_Feeding_deterrent_activity_of_synthesized_silver_nanoparticles_using_Manilkara_zapota_leaf_extract_against_the_house_fly_Musca_domestica_Diptera_Muscidae/links/594358e2a6fdccb93ab279ac/Feeding-deterrent-activity-of-synthesized-silver-nanoparticles-using-Manilkara-zapota-leaf-extract-against-the-house-fly-Musca-domest…	https://scholar.google.com/scholar?q=related:_A5sjgOlL4gJ:scholar.google.com/&scioq=sapodila+bacterial+infection&hl=en&as_sdt=2007
169	0	WSW Abd Aziz, A Adnan	Employed Bacterial Species and Bacterial Cellulose (BC) Applications: The State of Play	2022	Squalen Bulletin of Marine and Fisheries …	academia.edu	https://www.academia.edu/download/103474538/pdf.pdf		169	2024-07-09 11:44:40	PDF								0	0	0	2	2	… bacterium with thermotolerant characteristics isolated from persimmon and sapodilla fruits … of nosocomial outbreaks and can cause numerous infections, including cerebral abscess, …	https://www.academia.edu/download/103474538/pdf.pdf	https://scholar.google.com/scholar?q=related:H8OpxkeoLbwJ:scholar.google.com/&scioq=sapodila+bacterial+infection&hl=en&as_sdt=2007
170	0	C Singh, N Kumar, NU Joshi, ...	Enhancing post-harvest quality of sapota using ultraviolet-C irradiation: A study on efficacy and effects	2023	Food Science and …	journals.sagepub.com	https://journals.sagepub.com/doi/abs/10.1177/10820132231211934		170	2024-07-09 11:44:40		10.1177/10820132231211934							0	0	0	4	1	… Sapota, also known as Sapodilla, is a tropical evergreen plant belonging to the Sapotaceae … The application of UV-C irradiation significantly reduced fungal and bacterial infections in …		https://scholar.google.com/scholar?q=related:tZY6Cfc3y4MJ:scholar.google.com/&scioq=sapodila+bacterial+infection&hl=en&as_sdt=2007
171	4	JH Crane, CF Balerdi, MS Orfanedes	Tropical and Subtropical Fruit Crops for the Home Landscape: Alternatives to Citrus1	2010	UF IFAS Extension	growables.org	https://www.growables.org/information/documents/AlternativeCitrus.pdf	https://scholar.google.com/scholar?cites=18294972141103551720&as_sdt=2005&sciodt=2007&hl=en	171	2024-07-09 11:44:40	PDF								4	0.29	1	3	14	… Bacterial citrus canker and now citrus greening have ravaged citrus plantings throughout Miami-Dade and Broward Counties and much of south Florida. Infected … (guava and sapodilla) …	https://www.growables.org/information/documents/AlternativeCitrus.pdf	https://scholar.google.com/scholar?q=related:6BQlPjvM5P0J:scholar.google.com/&scioq=sapodila+bacterial+infection&hl=en&as_sdt=2007
172	31	T Garg, AK Goyal	Medicated chewing gum: patient compliance oral drug delivery system	2014	Drug delivery letters	ingentaconnect.com	https://www.ingentaconnect.com/content/ben/ddl/2014/00000004/00000001/art00009	https://scholar.google.com/scholar?cites=13846566284973466741&as_sdt=2005&sciodt=2007&hl=en	172	2024-07-09 11:44:40									31	3.1	16	2	10	… MCGs widely used for local effects in various conditions (plaque acid neutralization, fresh breath, dental caries, anti-plaque, fungal, and bacterial infections) and systemic effects in …	https://www.ingentaconnect.com/content/ben/ddl/2014/00000004/00000001/art00009?crawler=true&mimetype=application/pdf	https://scholar.google.com/scholar?q=related:dWS-hqziKMAJ:scholar.google.com/&scioq=sapodila+bacterial+infection&hl=en&as_sdt=2007
173	9	M Levine	… the soil as a determining factor in the health of the beet, Beta vulgaris, and its relation to the size and weight of the crown gall produced by inoculation with Bacterium …	1921	American Journal of Botany	JSTOR	https://www.jstor.org/stable/2435554	https://scholar.google.com/scholar?cites=4899240950306482656&as_sdt=2005&sciodt=2007&hl=en	173	2024-07-09 11:44:40									9	0.09	9	1	103	… their roots inoculated with Bacterium tumejaciens. Representative plants with their infected roots from each group are shown in figure 2. Figure 2, "A" shows an infected root of a plant …		https://scholar.google.com/scholar?q=related:4KkQ4K-Z_UMJ:scholar.google.com/&scioq=sapodila+bacterial+infection&hl=en&as_sdt=2007
174	3	A Trilana, D Susanti, ...	Profile of Acute Pharyngitis at Dr. Soetomo General Hospital Pediatric Outpatients Clinic in 2013	2018	Biomolecular and Health …	repository.ubaya.ac.id	http://repository.ubaya.ac.id/44448/	https://scholar.google.com/scholar?cites=2182225407965569072&as_sdt=2005&sciodt=2007&hl=en	174	2024-07-09 11:44:40									3	0.5	1	3	6	… infection with cough as one of the complaint, where it was not found in bacterial infection.… level, especially to combat viral and bacterial infection.This study was similar with the theory …	http://repository.ubaya.ac.id/44448/2/Amanda%20Trilana_Profile%20of%20Acute%20Pharyngitis.pdf	https://scholar.google.com/scholar?q=related:MKCeVXLSSB4J:scholar.google.com/&scioq=sapodila+bacterial+infection&hl=en&as_sdt=2007
175	157	D Letchumanan, SPM Sok, S Ibrahim, NH Nagoor, ...	Plant-based biosynthesis of copper/copper oxide nanoparticles: an update on their applications in biomedicine, mechanisms, and toxicity	2021	Biomolecules	mdpi.com	https://www.mdpi.com/2218-273X/11/4/564	https://scholar.google.com/scholar?cites=12939237987061657621&as_sdt=2005&sciodt=2007&hl=en	175	2024-07-09 11:44:40	HTML								157	52.33	31	5	3	… ) is higher in Gram-positive bacteria compared to Gram-negative bacteria [81,86]. Altogether… required to treat various pathogenic infections based on the type of bacterial agent involved. …	https://www.mdpi.com/2218-273X/11/4/564	https://scholar.google.com/scholar?q=related:FfAM62RokbMJ:scholar.google.com/&scioq=sapodila+bacterial+infection&hl=en&as_sdt=2007
176	2	AJ Bai, VR Rai	Quorum sensing inhibitors from phytochemicals and food sources and their potential applications in food quality	2020	Functional Foods and Biotechnology	taylorfrancis.com	https://www.taylorfrancis.com/chapters/edit/10.1201/9781003003793-24/quorum-sensing-inhibitors-phytochemicals-food-sources-potential-applications-food-quality-jamuna-bai-ravishankar-rai	https://scholar.google.com/scholar?cites=18381968535045515318&as_sdt=2005&sciodt=2007&hl=en	176	2024-07-09 11:44:40		10.1201/9781003003793-24							2	0.5	1	2	4	… in foodborne bacteria, it may be possible to attenuate virulence in pathogenic bacteria and … The edible fruits of pineapple, banana, sapodilla and the leaves of the herb of the holy basil …		https://scholar.google.com/scholar?q=related:NqjLo_3eGf8J:scholar.google.com/&scioq=sapodila+bacterial+infection&hl=en&as_sdt=2007
177	95	R Lainson, J Strangways-Dixon	Leishmania mexicana: the epidemiology of dermal leishmaniasis in British Honduras	1963	Transactions of the Royal Society of …	Elsevier	https://www.sciencedirect.com/science/article/pii/0035920363901822	https://scholar.google.com/scholar?cites=13729867554329095117&as_sdt=2005&sciodt=2007&hl=en	177	2024-07-09 11:44:40									95	1.56	48	2	61	… Variable degrees of secondary bacterial infections are common, especially in the badly … Certainly the chicleros do climb the sapodilla trees when collecting the latex, but we think …	https://citeseerx.ist.psu.edu/document?repid=rep1&type=pdf&doi=1e0827b6bb6f9490cfd7f068b8fbcc8f9524db9a	https://scholar.google.com/scholar?q=related:zWvy9MtJir4J:scholar.google.com/&scioq=sapodila+bacterial+infection&hl=en&as_sdt=2007
178	6	K Freeman	American cutaneous leishmaniasis	1983	BMJ Military Health	scholar.archive.org	https://scholar.archive.org/work/edocymnkufh2xgsaxprnx76f3u/access/wayback/https://jramc.bmj.com/content/jramc/129/3/167.full.pdf	https://scholar.google.com/scholar?cites=14198402071383081326&as_sdt=2005&sciodt=2007&hl=en	178	2024-07-09 11:44:40	PDF								6	0.15	6	1	41	… Belizians infection occurs mainly in mahogany cutters and chicleros. Chicleros tap the 'sapodilla… Superficial smears may be negative in the presence of secondary bacterial infection; it is …	https://scholar.archive.org/work/edocymnkufh2xgsaxprnx76f3u/access/wayback/https://jramc.bmj.com/content/jramc/129/3/167.full.pdf	https://scholar.google.com/scholar?q=related:boH1InXbCsUJ:scholar.google.com/&scioq=sapodila+bacterial+infection&hl=en&as_sdt=2007
179	0	SS Lim, A Selvaraj, ZY Ng, M Palanisamy, ...	Malaysian Journal of Microbiology		researchgate.net		https://www.researchgate.net/profile/Suresh-Mickymaray/publication/328853232_Isolation_of_actinomycetes_with_antibacterial_activity_against_multi-drug_resistant_bacteria/links/5c1a1ba492851c22a3361171/Isolation-of-actinomycetes-with-antibacterial-activity-against-multi-drug-resistant-bacteria.pdf		179	2024-07-09 11:44:40	PDF								0	0	0	5		… bacteria. MG1A exhibited the strongest and broadest spectrum of antibacterial activity against 6 MDR bacteria … The high prevalence of antibiotic resistance in hospital-acquired infections …	https://www.researchgate.net/profile/Suresh-Mickymaray/publication/328853232_Isolation_of_actinomycetes_with_antibacterial_activity_against_multi-drug_resistant_bacteria/links/5c1a1ba492851c22a3361171/Isolation-of-actinomycetes-with-antibacterial-activity-against-multi-drug-resistant-bacteria.pdf	https://scholar.google.com/scholar?q=related:6z7vEJKpEocJ:scholar.google.com/&scioq=sapodila+bacterial+infection&hl=en&as_sdt=2007
180	5	AK Singh, K Bhardwaj	Mechanistic understanding of green synthesized cerium oxide for the photocatalytic degradation of dyes and antibiotics from aqueous media and antimicrobial efficacy …	2023	Environmental Research	Elsevier	https://www.sciencedirect.com/science/article/pii/S0013935123028050	https://scholar.google.com/scholar?cites=1728256541346433570&as_sdt=2005&sciodt=2007&hl=en	180	2024-07-09 11:44:40									5	5	3	2	1	… , grinding the fresh sapodilla fruits. Then … bacteria than against gram positive bacteria. The reason behind this observation was structural difference in the cell membrane of the bacteria, …		https://scholar.google.com/scholar?q=related:Igqz6yoA_BcJ:scholar.google.com/&scioq=sapodila+bacterial+infection&hl=en&as_sdt=2007
181	0	JR Edelman, YJ Lin	Further studies on the microbial content (endomicrobiology, endobacteriology) of fruit and vegetable crops: the study continues!	2019		pdfs.semanticscholar.org	https://pdfs.semanticscholar.org/7b85/2c9a9625ee70cd6eab0de336481673dd7e57.pdf		181	2024-07-09 11:44:40	PDF								0	0	0	2	5	… indeed found to harbor bacteria and in some cases fungi. The bacterial/fungal content of … most likely also identify some cases of human infection. Again, this does not necessarily imply …	https://pdfs.semanticscholar.org/7b85/2c9a9625ee70cd6eab0de336481673dd7e57.pdf	https://scholar.google.com/scholar?q=related:amXo9VMMjN4J:scholar.google.com/&scioq=sapodila+bacterial+infection&hl=en&as_sdt=2007
182	8	F Sharififar, M Ansari, T Eslaminejad, M Ohadi, ...	Antimicrobial potency of plant species: a review.	2015		researchgate.net	https://www.researchgate.net/profile/Mehdi-Ansari-Dogaheh/publication/282796292_Antimicrobial_Potency_of_Plant_Species_A_Review/links/56ee9b0b08ae59dd41c6cbca/Antimicrobial-Potency-of-Plant-Species-A-Review.pdf	https://scholar.google.com/scholar?cites=13294126377022191289&as_sdt=2005&sciodt=2007&hl=en	182	2024-07-09 11:44:40	PDF								8	0.89	2	5	9	… In some species (Arabidopsis thaliana) using Agrobacterium does not work efficiently due to plant immune responses triggered by perception of bacteria [132]. Sometimes the infection …	https://www.researchgate.net/profile/Mehdi-Ansari-Dogaheh/publication/282796292_Antimicrobial_Potency_of_Plant_Species_A_Review/links/56ee9b0b08ae59dd41c6cbca/Antimicrobial-Potency-of-Plant-Species-A-Review.pdf	https://scholar.google.com/scholar?q=related:ufaOLYE5frgJ:scholar.google.com/&scioq=sapodila+bacterial+infection&hl=en&as_sdt=2007
183	0	AMM AL-RAWI, SASM AL-HAMDONI	MANUFACTURING A NEW MEDICATED CHEWABLE GUM FROM NATURAL MATERIALS TO CONTROL PERIODONTAL PATHOGENS		researchgate.net		https://www.researchgate.net/profile/Sumaya-Al-Hamdoni/publication/379411998_MANUFACTURING_A_NEW_MEDICATED_CHEWABLE_GUM_FROM_NATURAL_MATERIALS_TO_CONTROL_PERIODONTAL_PATHOGENS/links/6607b9d2f5a5de0a9fecf65b/MANUFACTURING-A-NEW-MEDICATED-CHEWABLE-GUM-FROM-NATURAL-MATERIALS-TO-CONTROL-PERIODONTAL-PATHOGENS.pdf		183	2024-07-09 11:44:40	PDF								0	0	0	2		… to unsuccessful treatment and recurrent infections. Therefore, as a … infections was tested by measuring the level of bacterial … efficiency in reducing the bacterial load inside the gingival …	https://www.researchgate.net/profile/Sumaya-Al-Hamdoni/publication/379411998_MANUFACTURING_A_NEW_MEDICATED_CHEWABLE_GUM_FROM_NATURAL_MATERIALS_TO_CONTROL_PERIODONTAL_PATHOGENS/links/6607b9d2f5a5de0a9fecf65b/MANUFACTURING-A-NEW-MEDICATED-CHEWABLE-GUM-FROM-NATURAL-MATERIALS-TO-CONTROL-PERIODONTAL-PATHOGENS.pdf	https://scholar.google.com/scholar?q=related:0EfZmz1hHzwJ:scholar.google.com/&scioq=sapodila+bacterial+infection&hl=en&as_sdt=2007
184	0	S Pongpat, P Kewsuwan, S Jetawattana, N Piadang	Studies on the water vapor permeability and the effect on bacterial growth of pva/sf blend hydrogels prepared by gamma irradiation for wound dressing	2004		inis.iaea.org	https://inis.iaea.org/search/search.aspx?orig_q=RN:37048191		184	2024-07-09 11:44:40									0	0	0	4	20	… size of bacterial cells. Therefore, (he gel was able to use as an effective barrier to protect the wound from bacterial infection. … /chitosaiE coating on quality and shelf-life of sapodilla fruits …	https://inis.iaea.org/collection/NCLCollectionStore/_Public/37/048/37048191.pdf	https://scholar.google.com/scholar?q=related:lw1eM8PAC6oJ:scholar.google.com/&scioq=sapodila+bacterial+infection&hl=en&as_sdt=2007
185	0	K Verma, Y Mishra, N Kapoor, ...	Role of Indian Medicinal Plants for Immunity Booster Against SARS-CoV-2 Infection: An Updated Review	2024	Current Nutrition &Food …	ingentaconnect.com	https://www.ingentaconnect.com/content/ben/cnf/2024/00000020/00000007/art00006		185	2024-07-09 11:44:40									0	0	0	4	1	… Gaertn, a member of the Euphorbiaceae family, in Indian medicine, is frequently employed and is thought to boost defenses against bacterial, fungal, and viral threats infections (Fig. 2Av…		https://scholar.google.com/scholar?q=related:lKTNSspsJsUJ:scholar.google.com/&scioq=sapodila+bacterial+infection&hl=en&as_sdt=2007
186	0	RAT Marbun	Test of Active Compound and Activity Pirdot Leaf Extract (Sauraia Vulcani Korth.) on Candida Albicans Growth in Vitro	2020	Asian Journal of Pharmaceutical Research and …	ajprd.com	http://www.ajprd.com/index.php/journal/article/view/825		186	2024-07-09 11:44:40									0	0	0	1	4	… time to treat wounds and prevent bacterial infections. Pirdot leaves contain compounds in the … The antifungal activity of ethanol extract and sapodilla fruit skin fraction was caused by the …	https://www.ajprd.com/index.php/journal/article/download/825/677	https://scholar.google.com/scholar?q=related:-s7nVSqClksJ:scholar.google.com/&scioq=sapodila+bacterial+infection&hl=en&as_sdt=2007
187	0	EW Hewett	CIGR Handbook of Agricultural Engineering, Volume IV Agro Processing Engineering, Chapter 3 Fruits and Vegetables, Part 3.2 Fruit and Vegetable Storage …	1999		Citeseer	https://citeseerx.ist.psu.edu/document?repid=rep1&type=pdf&doi=4b66820cd845f23b7190a20f21d8b1fbe4dbdaf2#page=290		187	2024-07-09 11:44:40	PDF								0	0	0	1	25	… Such damage dramatically increases water loss and susceptibility to infection by postharvest fungi and bacteria. In addition, respiration and ethylene production are enhanced in …	https://citeseerx.ist.psu.edu/document?repid=rep1&type=pdf&doi=4b66820cd845f23b7190a20f21d8b1fbe4dbdaf2#page=290	https://scholar.google.com/scholar?q=related:BHlWdECPOfYJ:scholar.google.com/&scioq=sapodila+bacterial+infection&hl=en&as_sdt=2007
188	8	A Maitra, D Morando	Methods of identifying and quantifying bacteria in chewing gum	2018	US Patent 10,023,919	Google Patents	https://patents.google.com/patent/US10023919B2/en	https://scholar.google.com/scholar?cites=7922212620348202561&as_sdt=2005&sciodt=2007&hl=en	188	2024-07-09 11:44:40									8	1.33	4	2	6	US10023919B2 - Methods of identifying and quantifying bacteria in chewing gum - Google Patents US10023919B2 - Methods of identifying and quantifying bacteria in chewing gum - …	https://patentimages.storage.googleapis.com/ec/04/22/21b8bca6c84a1b/US10023919.pdf	https://scholar.google.com/scholar?q=related:QZ74jmda8W0J:scholar.google.com/&scioq=sapodila+bacterial+infection&hl=en&as_sdt=2007
189	6	SS Biradar, ST Bhagavti, VI Hukkeri, ...	Chewing gum as a drug delivery system	2005	Scientific …	scientific-journal-articles.org	http://www.scientific-journal-articles.org/greek/free-online-journals/pharmaceutics/pharmaceutics-articles/Biradar-ChewingGum/ChewingGum.htm	https://scholar.google.com/scholar?cites=9576199679117412138&as_sdt=2005&sciodt=2007&hl=en	189	2024-07-09 11:44:40	HTML								6	0.32	2	4	19	… If the gum base is chicle from the sapodilla tree, this product is … chewing gum in oral infections caused by bacteria or fungi are … , peridontitis and other oral and pharyngeal infections 4 …	http://www.scientific-journal-articles.org/greek/free-online-journals/pharmaceutics/pharmaceutics-articles/Biradar-ChewingGum/ChewingGum.htm	https://scholar.google.com/scholar?q=related:KscADN9-5YQJ:scholar.google.com/&scioq=sapodila+bacterial+infection&hl=en&as_sdt=2007
190	2	P Mishra, J Banweer, P Tahilani, ...	Herbal chewing Gum to Treat Mouth Ulcer using Guava Leaf and Turmeric Rhizomes	2022	… . 2022; 21 (5)	ijclinmedcasereports.com	https://ijclinmedcasereports.com/pdf/IJCMCR-RW-00524.pdf	https://scholar.google.com/scholar?cites=15936857963664780600&as_sdt=2005&sciodt=2007&hl=en	190	2024-07-09 11:44:40	PDF								2	1	1	4	2	… Infections: Bacterial, viral or fungal infections may cause mouth ulcers. Stress Related … Over a decade ago, the Mayan Indians chewed tree resin from the sapodilla tree in order to clean …	https://ijclinmedcasereports.com/pdf/IJCMCR-RW-00524.pdf	https://scholar.google.com/scholar?q=related:OC0YgOEXK90J:scholar.google.com/&scioq=sapodila+bacterial+infection&hl=en&as_sdt=2007
191	9	YC Mendes, GP Mesquita, GDE Costa, ...	Evaluation of growth, viability, lactic acid production and anti-infective effects of Lacticaseibacillus rhamnosus ATCC 9595 in Bacuri Juice (Platonia insignis)	2021	Foods	mdpi.com	https://www.mdpi.com/2304-8158/10/3/603	https://scholar.google.com/scholar?cites=13900193263841858865&as_sdt=2005&sciodt=2007&hl=en	191	2024-07-09 11:44:40	HTML								9	3	2	4	3	… Following this, the effects of bacterial inoculum and pulp … Tenebrio molitor larvae infected by enteroaggregative Escherichia … In our assay, infected larvae without treatment had a median …	https://www.mdpi.com/2304-8158/10/3/603	https://scholar.google.com/scholar?q=related:MVWSiCBo58AJ:scholar.google.com/&scioq=sapodila+bacterial+infection&hl=en&as_sdt=2007
192	0	Y Sabilu, MH Jafriati, NIP YuniarPraheswari, ...	Testing the Antibacterial Activity of Tabasco Pepper Leaf Ethanol Extract Grown in Coastal Area on Staphylococcus aureus and Escherichia coli	2021	Annals of the …	annalsofrscb.ro	http://annalsofrscb.ro/index.php/journal/article/view/4890		192	2024-07-09 11:44:40									0	0	0	4	3	… Infectious diseases are one of the main causes of death worldwide, and are generally caused by bacteria[1].Pathogenic bacteria that can cause infections and abnormalities in the skin, …	http://annalsofrscb.ro/index.php/journal/article/download/4890/3918	https://scholar.google.com/scholar?q=related:N11izZX00_wJ:scholar.google.com/&scioq=sapodila+bacterial+infection&hl=en&as_sdt=2007
193	0	J Summerfield	A search for quorum quenching compounds in marine bacteria of the Perth metropolitan area	2012		research-repository.uwa.edu.au	https://research-repository.uwa.edu.au/files/3222624/Summerfield_Jamie_2012.pdf		193	2024-07-09 11:44:40	BOOK								0	0	0	1	12	… bacterial quorum sensing. Quorum sensing is a chemical communication system used by bacteria … quorum quenching compounds, could potentially be used to inhibit bacterial disease. …	https://research-repository.uwa.edu.au/files/3222624/Summerfield_Jamie_2012.pdf	https://scholar.google.com/scholar?q=related:lqBTz-sURD4J:scholar.google.com/&scioq=sapodila+bacterial+infection&hl=en&as_sdt=2007
194	1	K Anoop, KV Thanzeen	New report of Curvularia pallescens Boedijn. as leaf spot pathogen in Manilkara zapota (L.) P. Royen in India	2020	Indian J. Applied &Pure Bio. Vol	researchgate.net	https://www.researchgate.net/profile/Anoop-Kuttiyil/publication/344411675_New_report_of_Curvularia_pallescens_Boedijn_as_leaf_spot_pathogen_in_Manilkara_zapota_L_P_Royen_in_India/links/5f72b9b992851c14bc9cf957/New-report-of-Curvularia-pallescens-Boedijn-as-leaf-spot-pathogen-in-Manilkara-zapota-L-P-Royen-in-India.pdf	https://scholar.google.com/scholar?cites=11494870317979071931&as_sdt=2005&sciodt=2007&hl=en	194	2024-07-09 11:44:40	PDF								1	0.25	1	2	4	… The midrib was also later found to be infected by the … No other fungal or bacterial organisms were found to grow from the … Sapodilla: A potential crop for subtropical climates In: Janick J. (…	https://www.researchgate.net/profile/Anoop-Kuttiyil/publication/344411675_New_report_of_Curvularia_pallescens_Boedijn_as_leaf_spot_pathogen_in_Manilkara_zapota_L_P_Royen_in_India/links/5f72b9b992851c14bc9cf957/New-report-of-Curvularia-pallescens-Boedijn-as-leaf-spot-pathogen-in-Manilkara-zapota-L-P-Royen-in-India.pdf	https://scholar.google.com/scholar?q=related:u_VS2qb7hZ8J:scholar.google.com/&scioq=sapodila+bacterial+infection&hl=en&as_sdt=2007
195	76	SADM Zahir, AF Omar, MF Jamlos, MAM Azmi, ...	A review of visible and near-infrared (Vis-NIR) spectroscopy application in plant stress detection	2022	Sensors and Actuators A …	Elsevier	https://www.sciencedirect.com/science/article/pii/S0924424722001066	https://scholar.google.com/scholar?cites=7919286261145156325&as_sdt=2005&sciodt=2007&hl=en	195	2024-07-09 11:44:40									76	38	15	5	2	… , biomaterials and biological organisms like bacteria or animals. … better performance since the infection could be detected two … to assess the firmness of intact sapodilla by using Vis-NIR …		https://scholar.google.com/scholar?q=related:5TowduX05m0J:scholar.google.com/&scioq=sapodila+bacterial+infection&hl=en&as_sdt=2007
196	18	SM Mousavi, K Yousefi, SA Hashemi, M Afsa, ...	Renewable carbon nanomaterials: Novel resources for dental tissue engineering	2021	Nanomaterials	mdpi.com	https://www.mdpi.com/2079-4991/11/11/2800	https://scholar.google.com/scholar?cites=14457937200834583146&as_sdt=2005&sciodt=2007&hl=en	196	2024-07-09 11:44:40	HTML								18	6	4	5	3	… of these compounds on pathogens and bacteria has led to the … , and secondary bacterial infections and biofilm formation are … They effectually synthesized rGO/AgNCs by using sapodilla …	https://www.mdpi.com/2079-4991/11/11/2800	https://scholar.google.com/scholar?q=related:apqmYEjppMgJ:scholar.google.com/&scioq=sapodila+bacterial+infection&hl=en&as_sdt=2007
197	0	MBM SATTAR	CHARACTERIZATION, PATHOGENICITY AND HOST RANGE ANALYSES OF Lasiodiplodia sp. AND RELATED SPECIES ISOLATED FROM FRUIT ROT …	2017		psasir.upm.edu.my	http://psasir.upm.edu.my/id/eprint/69780/1/fs%202017%2060%20ir.pdf		197	2024-07-09 11:44:40	PDF								0	0	0	1	7	… , musk lime, guava, mandarin and sapodilla if dissemination of inoculums were occurred … as fungus, bacteria, virus, viroid and nematode are classified as the infectious disease and …	http://psasir.upm.edu.my/id/eprint/69780/1/fs%202017%2060%20ir.pdf	https://scholar.google.com/scholar?q=related:-SLYUjdfMEcJ:scholar.google.com/&scioq=sapodila+bacterial+infection&hl=en&as_sdt=2007
198	6	SKR Lima, AG Coêlho, M Lucarini, A Durazzo, ...	The Platonia insignis Mart. as the Promising Brazilian 'Amazon Gold': The State-of-the-Art and Prospects	2022	Agriculture	mdpi.com	https://www.mdpi.com/2077-0472/12/11/1827	https://scholar.google.com/scholar?cites=14164814214236783206&as_sdt=2005&sciodt=2007&hl=en	198	2024-07-09 11:44:40	HTML								6	3	1	5	2	… or associated treatment of infections caused by fungi and bacteria [72]. … bacteria and fungi of clinical interest for isolated treatment or associated with fungal and bacterial infections for …	https://www.mdpi.com/2077-0472/12/11/1827	https://scholar.google.com/scholar?q=related:ZsL8vHqHk8QJ:scholar.google.com/&scioq=sapodila+bacterial+infection&hl=en&as_sdt=2007
199	44	H Nakashima	Biological activity of Feijoa peel extracts	2001	… Papers of the Kagoshima University Research …	cpi.kagoshima-u.ac.jp	http://cpi.kagoshima-u.ac.jp/publications/occasionalpapers/occasional/vol-34/34-22.pdf	https://scholar.google.com/scholar?cites=1116852511078316925&as_sdt=2005&sciodt=2007&hl=en	199	2024-07-09 11:44:40	PDF								44	1.91	44	1	23	… virus (HIV) activity and anti-bacterial activity of fractions of Feijoa peel extracts. … , were infected with HIV-1IIIB at a multiplicity of infection (moi) of 0.01. HIV-infected or mockinfected MT-4 …	http://cpi.kagoshima-u.ac.jp/publications/occasionalpapers/occasional/vol-34/34-22.pdf	https://scholar.google.com/scholar?q=related:fXtTBXHbfw8J:scholar.google.com/&scioq=sapodila+bacterial+infection&hl=en&as_sdt=2007
200	16	TC Pimentel, LIG de Oliveira, ELC Macedo, ...	Understanding the potential of fruits, flowers, and ethnic beverages as valuable sources of techno-functional and probiotics strains: Current scenario and main …	2021	Trends in Food Science …	Elsevier	https://www.sciencedirect.com/science/article/pii/S0924224421003460	https://scholar.google.com/scholar?cites=2920966859439471426&as_sdt=2005&sciodt=2007&hl=en	200	2024-07-09 11:44:40									16	5.33	4	4	3	… Flowers have been attracting attention due to the presence of bacteria of the genus Fructobacillus that comprise species with fructophilic characteristics, ie, preference for d-fructose …		https://scholar.google.com/scholar?q=related:QvuT-eFbiSgJ:scholar.google.com/&scioq=sapodila+bacterial+infection&hl=en&as_sdt=2007
201	11	P Katoch, A Katoch, M Podel, S Uperti	Bakanae of rice: a serious disease in Punjab	2019	International Journal of …	academia.edu	https://www.academia.edu/download/105035445/Pooja_20Katoch__20et_20al.pdf	https://scholar.google.com/scholar?cites=2026421629062536172&as_sdt=2005&sciodt=2007&hl=en	201	2024-07-09 11:44:40	PDF								11	2.2	3	4	5	… Rice being affected by various insects, pests, fungi, bacteria and nematodes are the major … show the ratio of infected tiller not more than 0.01% whereas the ratio of infected tiller was 9.9 …	https://www.academia.edu/download/105035445/Pooja_20Katoch__20et_20al.pdf	https://scholar.google.com/scholar?q=related:7NtwNbxLHxwJ:scholar.google.com/&scioq=sapodila+bacterial+infection&hl=en&as_sdt=2007
202	0	MH Zuberi, U Haroon, A Tajammul, ...	Development and evaluation of herbal formulation AKIGTU01 and AKIGCL03 against acne producing microbes.	2022	Pakistan Journal of …	search.ebscohost.com	https://search.ebscohost.com/login.aspx?direct=true&profile=ehost&scope=site&authtype=crawler&jrnl=1011601X&AN=156575724&h=RJauLpU9rYQU3S96SUMuGfNj8ZWYPC1faLGiA2pIkkMglN0PU6yuC7X7jswEqe7bVgz13uQBbQC0gjokF%2Bou%2Fw%3D%3D&crl=c		202	2024-07-09 11:44:40									0	0	0	4	2	… In our study we have isolated Propionibacterium acnes from infected individuals and tested … Propionibacterium acnes characterized as an anaerobic, Gram-positive bacterium is …		https://scholar.google.com/scholar?q=related:Xk9uahvHjbEJ:scholar.google.com/&scioq=sapodila+bacterial+infection&hl=en&as_sdt=2007
203	33	L Bruno, MA Nappo, L Ferrari, R Di Lecce, C Guarnieri, ...	Nipah virus disease: epidemiological, clinical, diagnostic and legislative aspects of this unpredictable emerging zoonosis	2022	Animals	mdpi.com	https://www.mdpi.com/2076-2615/13/1/159	https://scholar.google.com/scholar?cites=16322857255613697708&as_sdt=2005&sciodt=2007&hl=en	203	2024-07-09 11:44:40	HTML								33	16.5	6	6	2	… This review summarizes fundamental aspects of Nipah virus (NiV) infection with particular … spp.) and fibers and pulp of sapodilla (Manilkara zapota) and mango (Mangifera indica). …	https://www.mdpi.com/2076-2615/13/1/159	https://scholar.google.com/scholar?q=related:rA5DGDFwhuIJ:scholar.google.com/&scioq=sapodila+bacterial+infection&hl=en&as_sdt=2007
204	1	R Chatelain	Protozoal Infections	2009	Braun-Falco's Dermatology	Springer	https://link.springer.com/chapter/10.1007/978-3-540-29316-3_23	https://scholar.google.com/scholar?cites=6457359452855445116&as_sdt=2005&sciodt=2007&hl=en	204	2024-07-09 11:44:40		10.1007/978-3-540-29316-3_23							1	0.07	1	1	15	… is a forest worker who harvests chicle from the sapodilla tree for chewing gum). Other regional … In mucocutaneous lesions, the secondary bacterial infection apparently helps destroy the …		https://scholar.google.com/scholar?q=related:fKZ1tjUmnVkJ:scholar.google.com/&scioq=sapodila+bacterial+infection&hl=en&as_sdt=2007
205	0	NENBM Asmadi	THE EXPRESSION OF RESISTANCE GENE ON INDONESIA PIGMENTED LOCAL RICE VARIETIES AGAINST BACTERIAL LEAF BLIGHT DISEASE		bioteknologi.pasca.unej.ac.id		https://bioteknologi.pasca.unej.ac.id/wp-content/uploads/sites/2/2022/09/8.b.-Samples-of-Thesis.pdf		205	2024-07-09 11:44:40	PDF								0	0	0	1		… The seedlings began to show signs and symptoms of bacterial infection starting from 7 days after pathogen inoculation. After the inoculation process, the slightly symptom can be seen …	https://bioteknologi.pasca.unej.ac.id/wp-content/uploads/sites/2/2022/09/8.b.-Samples-of-Thesis.pdf	https://scholar.google.com/scholar?q=related:zLqtfNO9Ep4J:scholar.google.com/&scioq=sapodila+bacterial+infection&hl=en&as_sdt=2007
206	0	AA Chaudhary, M Fareed	Exploration and Purification of Secondary Metabolites from Lactobacillus acidophilus and Their Potential as a Bio-preservative	2024	UTTAR PRADESH JOURNAL …	library.thepustakas.com	http://library.thepustakas.com/id/eprint/1849/		206	2024-07-09 11:44:40									0	0	0	2	1	… cell walls and combat bacteria responsible for food spoilage. … Take the fruit samples (apple and sapodilla) and then cut it into … the sapodilla juice into 3 cork screw flasks in LAF [15]. …	http://library.thepustakas.com/id/eprint/1849/1/Chaudhary45112024UPJOZ3524.pdf	https://scholar.google.com/scholar?q=related:11GeWKI73JQJ:scholar.google.com/&scioq=sapodila+bacterial+infection&hl=en&as_sdt=2007
207	6	MN Aziz, A Zaki, I Ahamad, T Fatma	Silver nanoparticle synthesis from cyanobacteria: Environmental and biomedical applications	2021	Emerging technologies for …	Springer	https://link.springer.com/chapter/10.1007/978-3-030-50703-9_21	https://scholar.google.com/scholar?cites=5507876669464763222&as_sdt=2005&sciodt=2007&hl=en	207	2024-07-09 11:44:40		10.1007/978-3-030-50703-9_21							6	2	2	4	3	… infections, such as urinary tract infections, pneumonia, and bloodstream infections. In the … Manilkara zapota (sapodilla) leaf extract-mediated AgNPs were effective against the adults …	https://www.researchgate.net/profile/Irshad-Ahamad-2/publication/352697804_Silver_Nanoparticle_Synthesis_from_Cyanobacteria_Environmental_and_Biomedical_Applications/links/60e6c2340fbf460db8ee7ba9/Silver-Nanoparticle-Synthesis-from-Cyanobacteria-Environmental-and-Biomedical-Applications.pdf	https://scholar.google.com/scholar?q=related:VtsbHqbob0wJ:scholar.google.com/&scioq=sapodila+bacterial+infection&hl=en&as_sdt=2007
208	3	HH Idrus, Y Mangarengi, ...	Mycobacterium bovis BCG VPM1002 Vaccine on Gene CD4 T-cell Expression on Infected Covid-19	2021	Online …	greennetwork-events.com	https://www.greennetwork-events.com/all_images/file_691.pdf	https://scholar.google.com/scholar?cites=6859668398151361741&as_sdt=2005&sciodt=2007&hl=en	208	2024-07-09 11:44:40	PDF								3	1	1	3	3	… infectious agents and particularly respiratory tract infections and neonatal sepsis. Although the authors did not differentiate between bacterial and viral infections in this … tract infections in …	https://www.greennetwork-events.com/all_images/file_691.pdf	https://scholar.google.com/scholar?q=related:zeTIZBBwMl8J:scholar.google.com/&scioq=sapodila+bacterial+infection&hl=en&as_sdt=2007
209	0	SASM Al-Hamdoni	Molecular Identification of" Red Complex" Group from Chronic Periodontitis and the Effects of Two Natural Materials on Some of its Pathological Aspects		researchgate.net		https://www.researchgate.net/profile/Sumaya-Al-Hamdoni/publication/349427023_Molecular_Identification_of_Red_Complex_Group_from_Chronic_Periodontitis_and_the_Effects_of_Two_Natural_Materials_on_Some_of_its_Pathological_Aspects/links/602f6cbd4585158939b4902d/Molecular-Identification-of-Red-Complex-Group-from-Chronic-Periodontitis-and-the-Effects-of-Two-Natural-Materials-on-Some-of-its-Pathological…		209	2024-07-09 11:44:40	PDF								0	0	0	1		… Although scaling and root planning (SRP) are the first stages in the treatment of infected periodontal pockets, the resident bacteria in deeper pockets may resume pathogenicity. This …	https://www.researchgate.net/profile/Sumaya-Al-Hamdoni/publication/349427023_Molecular_Identification_of_Red_Complex_Group_from_Chronic_Periodontitis_and_the_Effects_of_Two_Natural_Materials_on_Some_of_its_Pathological_Aspects/links/602f6cbd4585158939b4902d/Molecular-Identification-of-Red-Complex-Group-from-Chronic-Periodontitis-and-the-Effects-of-Two-Natural-Materials-on-Some-of-its-Pathological…	https://scholar.google.com/scholar?q=related:pkSnEr1n77kJ:scholar.google.com/&scioq=sapodila+bacterial+infection&hl=en&as_sdt=2007
210	5	MT Pérez-Rodríguez, B Sopeña, ...	Calf pyomyositis caused by Enterococcus faecalis	2011	… Journal of Medicine	academic.oup.com	https://academic.oup.com/qjmed/article-abstract/104/6/527/1579332	https://scholar.google.com/scholar?cites=2513047207820585366&as_sdt=2005&sciodt=2007&hl=en	210	2024-07-09 11:44:40									5	0.38	2	3	13	… This infection is quite rare given the inherent resistance of normal muscle to bacterial … as HIV infection, diabetes, malnutrition, cancer or steroid treatment, 2 are necessary to allow …	https://academic.oup.com/qjmed/article/104/6/527/1579332	https://scholar.google.com/scholar?q=related:lunu7R4j4CIJ:scholar.google.com/&scioq=sapodila+bacterial+infection&hl=en&as_sdt=2007
211	6	SA Alsareii, NAN Alzerwi, MY Alasmari, ...	Manilkara zapota L. extract topical ointment application to skin wounds in rats speeds up the healing process	2023	Frontiers in …	frontiersin.org	https://www.frontiersin.org/articles/10.3389/fphar.2023.1206438/full	https://scholar.google.com/scholar?cites=2427767369263200807&as_sdt=2005&sciodt=2007&hl=en	211	2024-07-09 11:44:40	HTML	10.3389/fphar.2023.1206438							6	6	2	4	1	… and protect the patient from infection. To effectively treat … Sapodilla plum may be a superior choice compared to other … Gram-negative bacteria than Gram-positive bacteria. The potential …	https://www.frontiersin.org/articles/10.3389/fphar.2023.1206438/full	https://scholar.google.com/scholar?q=related:J7o3Oo8psSEJ:scholar.google.com/&scioq=sapodila+bacterial+infection&hl=en&as_sdt=2007
212	0	EW Prasetyo, HZ Amanah, I Farras, ...	Detection of Fusarium spp. infection in potato (Solanum tuberosum L.) during postharvest storage through visible–near-infrared and shortwave–near …	2024	Open …	degruyter.com	https://www.degruyter.com/document/doi/10.1515/opag-2022-0295/html		212	2024-07-09 11:44:40	HTML	10.1515/opag-2022-0295							0	0	0	4	1	… , and tissue-borne bacteria that infected plants the previous … is the primary causal agent of putrefactive fungal infection in … due to single and mixed inoculum infections [6]. Meanwhile, …	https://www.degruyter.com/document/doi/10.1515/opag-2022-0295/html	https://scholar.google.com/scholar?q=related:abForCE0IWsJ:scholar.google.com/&scioq=sapodila+bacterial+infection&hl=en&as_sdt=2007
213	10	I WIJAYA, NA TASLIM, R NATZIR, ...	Molecular and Immunological Mechanisms of Channa striata in Diabetic Wound Healing.	2020	International …	pakdosen.unhas.ac.id	http://pakdosen.unhas.ac.id/storage/dokumen/artikel-1643814299-27%20Molecular%20and%20Immunological.pdf	https://scholar.google.com/scholar?cites=4672735528459240954&as_sdt=2005&sciodt=2007&hl=en	213	2024-07-09 11:44:40	PDF								10	2.5	3	4	4	… 2 and 3 and increased incidence of bacterial infection are the main feature of delayed … Antibacterial activities of Sapodilla fruit extract inhibiting Salmonella typhi in mice Balb/c. Int …	http://pakdosen.unhas.ac.id/storage/dokumen/artikel-1643814299-27%20Molecular%20and%20Immunological.pdf	https://scholar.google.com/scholar?q=related:-gUptzTk2EAJ:scholar.google.com/&scioq=sapodila+bacterial+infection&hl=en&as_sdt=2007
214	265	CL Wood, KD Lafferty, G DeLeo, HS Young, ...	Does biodiversity protect humans against infectious disease?	2014	Ecology	Wiley Online Library	https://esajournals.onlinelibrary.wiley.com/doi/abs/10.1890/13-1041.1	https://scholar.google.com/scholar?cites=6854935269150039007&as_sdt=2005&sciodt=2007&hl=en	214	2024-07-09 11:44:40		10.1890/13-1041.1							265	26.5	53	5	10	… Chicle is the latex produced by sapodilla trees, and chicleros are the men who venture into … This list does not include viruses and bacteria, but does provide consistent evaluations of …		https://scholar.google.com/scholar?q=related:3xv8606fIV8J:scholar.google.com/&scioq=sapodila+bacterial+infection&hl=en&as_sdt=2007
215	3	MA Islas-Osuna, ME Tiznado-Hernández	Biotechnology and molecular biology of tropical and subtropical fruits	2011	Postharvest Biology and …	Elsevier	https://www.sciencedirect.com/science/article/pii/B9781845697334500090	https://scholar.google.com/scholar?cites=2743554814553085782&as_sdt=2005&sciodt=2007&hl=en	215	2024-07-09 11:44:40									3	0.23	2	2	13	… Furthermore, many genes are known to play a key role in the fruit response to biotic stress including fungi infection, bacterial infection and virus attack as well as to abiotic stresses …		https://scholar.google.com/scholar?q=related:Vtc_X5EQEyYJ:scholar.google.com/&scioq=sapodila+bacterial+infection&hl=en&as_sdt=2007
216	5	J Kumar, RK Murali-Baskaran, SK Jain, PN Sivalingam, ...	Emerging and re-emerging biotic stresses of agricultural crops in India and novel tools for their better management	2021	Curr. Sci	researchgate.net	https://www.researchgate.net/profile/Jandrajupalli-Sridhar/publication/353128689_Emerging_and_re-emerging_biotic_stresses_of_agricultural_crops_in_India_and_novel_tools_for_their_better_management/links/60e8739a0fbf460db8f5b54c/Emerging-and-re-emerging-biotic-stresses-of-agricultural-crops-in-India-and-novel-tools-for-their-better-management.pdf	https://scholar.google.com/scholar?cites=15898392895366591659&as_sdt=2005&sciodt=2007&hl=en	216	2024-07-09 11:44:40	PDF								5	1.67	1	5	3	… Emergence of new bacterial diseases … in India due to infection of phytopathogenic bacteria. Some of them which have emerged with significant importance are bacterial blight of rice (…	https://www.researchgate.net/profile/Jandrajupalli-Sridhar/publication/353128689_Emerging_and_re-emerging_biotic_stresses_of_agricultural_crops_in_India_and_novel_tools_for_their_better_management/links/60e8739a0fbf460db8f5b54c/Emerging-and-re-emerging-biotic-stresses-of-agricultural-crops-in-India-and-novel-tools-for-their-better-management.pdf	https://scholar.google.com/scholar?q=related:q3Tr4xpwotwJ:scholar.google.com/&scioq=sapodila+bacterial+infection&hl=en&as_sdt=2007
217	36	R Sato, KM Dang, BG McPherson, ...	Anticancer activity of guava (Psidium guajava) extracts	2010	… of Complementary and …	degruyter.com	https://www.degruyter.com/document/doi/10.2202/1553-3840.1361/html	https://scholar.google.com/scholar?cites=5063498673888873248&as_sdt=2005&sciodt=2007&hl=en	217	2024-07-09 11:44:40		10.2202/1553-3840.1361							36	2.57	9	4	14	… aureus that may ward off infection, and its tannin content may … extract on the mutagenicity of bacteria, three research teams … Ciku (a tropical fruit known as sapodilla) was found to have …	https://www.researchgate.net/profile/Amy-Brown-22/publication/263543529_Anticancer_Activity_of_Guava_Psidium_guajava_Extracts_Anticancer_Activity_of_Guava_Psidium_guajava_Extracts/links/0f31753b343a1d120a000000/Anticancer-Activity-of-Guava-Psidium-guajava-Extracts-Anticancer-Activity-of-Guava-Psidium-guajava-Extracts.pdf	https://scholar.google.com/scholar?q=related:IMvOYTcpRUYJ:scholar.google.com/&scioq=sapodila+bacterial+infection&hl=en&as_sdt=2007
218	0	F Yesmin, MN Uddin, ...	Structural maps of the polytene chromosomes of the fruit flies Bactrocera zonata and Zeugodacus tau (Diptera: Tephri-tidae)	2021	Proceedings of the 1st In …	researchgate.net	https://www.researchgate.net/profile/Dr-Md-Hasanuzzaman/publication/354047057_Structural_Maps_of_the_Polytene_Chromosomes_of_the_Fruit_Flies_Bactrocera_zonata_and_Zeugodacus_tau_Diptera_Tephritidae/links/61fcbdcb1e98d168d7ed0e3e/Structural-Maps-of-the-Polytene-Chromosomes-of-the-Fruit-Flies-Bactrocera-zonata-and-Zeugodacus-tau-Diptera-Tephritidae.pdf		218	2024-07-09 11:44:40	PDF								0	0	0	3	3	… infection by bacteria in agriculture sectors. Cytogenetic studies of the Dipteran insects have greatly been simplified by the presence of polytene chromosomes [5]. It provides an …	https://www.researchgate.net/profile/Dr-Md-Hasanuzzaman/publication/354047057_Structural_Maps_of_the_Polytene_Chromosomes_of_the_Fruit_Flies_Bactrocera_zonata_and_Zeugodacus_tau_Diptera_Tephritidae/links/61fcbdcb1e98d168d7ed0e3e/Structural-Maps-of-the-Polytene-Chromosomes-of-the-Fruit-Flies-Bactrocera-zonata-and-Zeugodacus-tau-Diptera-Tephritidae.pdf	https://scholar.google.com/scholar?q=related:5_g_0opnZpAJ:scholar.google.com/&scioq=sapodila+bacterial+infection&hl=en&as_sdt=2007
219	13	KM Cahill	Tropical medicine: a clinical text	2011		books.google.com	https://books.google.com/books?hl=en&lr=&id=miE-QR8xEfIC&oi=fnd&pg=PR13&dq=sapodila+bacterial+infection&ots=pnTJMZfbV4&sig=CjOGEN330ambEM1bSRw3uqZvSc4	https://scholar.google.com/scholar?cites=883482625462763419&as_sdt=2005&sciodt=2007&hl=en	219	2024-07-09 11:44:40	BOOK								13	1	13	1	13	… use of antibiotic cream to control secondary bacterial infection, is often adequate. With multiple, … sapodilla trees in the jungles of Latin America for the manufacture of chewing gum. L. m. …		https://scholar.google.com/scholar?q=related:m__vV8TCQgwJ:scholar.google.com/&scioq=sapodila+bacterial+infection&hl=en&as_sdt=2007
220	0	F Yesmin, MN Uddin, M Hasanuzzaman	Structural maps of the polytene chromosomes of the fruit flies Bactrocera zonata and Zeugodacus tau (Diptera: Tephri-tidae). Proceedings 2021, 68, x	2021		pdfs.semanticscholar.org	https://pdfs.semanticscholar.org/451f/e2a4e77e9caec6b178ab86e12eb2a667f94c.pdf		220	2024-07-09 11:44:40	PDF								0	0	0	3	3	… infection by bacteria in agriculture sectors. Cytogenetic studies of the Dipteran insects have greatly been simplified by the presence of polytene chromosomes [5]. It provides an …	https://pdfs.semanticscholar.org/451f/e2a4e77e9caec6b178ab86e12eb2a667f94c.pdf	https://scholar.google.com/scholar?q=related:7kaN8eVmXr8J:scholar.google.com/&scioq=sapodila+bacterial+infection&hl=en&as_sdt=2007
221	6	PK Chaurasia, SL Bharati	The Chemistry inside Spices &Herbs: Research and Development: Volume 1	2022		books.google.com	https://books.google.com/books?hl=en&lr=&id=HoFvEAAAQBAJ&oi=fnd&pg=PP1&dq=sapodila+bacterial+infection&ots=WFFgAE2Vkn&sig=Lb_xb6rhlKnEc4wyEPc9p1pg4vA	https://scholar.google.com/scholar?cites=14558319616553144012&as_sdt=2005&sciodt=2007&hl=en	221	2024-07-09 11:44:40	BOOK								6	3	3	2	2	… The infection by the bacteria culminated in production of hairy roots near the site of bacterial entry. Hairy root induction has been tried on various spices plants, hence resulted in an …		https://scholar.google.com/scholar?q=related:zE5A146KCcoJ:scholar.google.com/&scioq=sapodila+bacterial+infection&hl=en&as_sdt=2007
222	8	P Arangannal, S Nithya, V Rekha, ...	Antibacterial Effectiveness of Cinnamon Chewing Gum on Streptococcus Mutans.	2019	Indian Journal of …	search.ebscohost.com	https://search.ebscohost.com/login.aspx?direct=true&profile=ehost&scope=site&authtype=crawler&jrnl=09760245&AN=139753462&h=JdJREQyPdlVAap4ZfThxkmps%2Fu325fkQys3%2Fi%2BNS88NfxRnd4x7f%2FBmzyLD8l4NDT%2BrJnko6UhdpVQX4NQiNjw%3D%3D&crl=c	https://scholar.google.com/scholar?cites=2553824947605756269&as_sdt=2005&sciodt=2007&hl=en	222	2024-07-09 11:44:40									8	1.6	2	4	5	… mastic (mastiche), and/or sapodilla tree (chicle). Later the … medicine for the treatment of infectious diseases.A large variety of … a significant decrease in the mean bacterial load (cfu/ml) of …		https://scholar.google.com/scholar?q=related:bVmSVEICcSMJ:scholar.google.com/&scioq=sapodila+bacterial+infection&hl=en&as_sdt=2007
223	27	BS Iskandar, J Iskandar, R Partasasmita, ...	Various medicinal plants traded in the village market of Karangwangi Village, Southern Cianjur, West Java, Indonesia	2020	Biodiversitas Journal of …	smujo.id	https://smujo.id/biodiv/article/view/6123	https://scholar.google.com/scholar?cites=11335139335131927635&as_sdt=2005&sciodt=2007&hl=en	223	2024-07-09 11:44:40									27	6.75	7	4	4	… disorders, among others, due to viral infections Sakit gigi … Eye pain due to various causes such as viruses, bacteria and … diabetes, dyslipidemia, microbial infections, and it is potentially …	https://smujo.id/biodiv/article/download/6123/4242	https://scholar.google.com/scholar?q=related:U5QYTiuBTp0J:scholar.google.com/&scioq=sapodila+bacterial+infection&hl=en&as_sdt=2007
224	0	MR Mohammed Rahmatullah, AN Abu Noman, ...	A survey of medicinal plants in two areas of Dinajpur district, Bangladesh including plants which can be used as functional foods.	2009		cabidigitallibrary.org	https://www.cabidigitallibrary.org/doi/full/10.5555/20103334390		224	2024-07-09 11:44:40		10.5555/20103334390							0	0	0	3	15	… Leaf juice is also used for bacterial infections. Leaf and flower juice is taken on a regular … diseases and diseases arising from bacterial, viral and fungal infections. Two plants appear …		https://scholar.google.com/scholar?q=related:xBtm5COk_RwJ:scholar.google.com/&scioq=sapodila+bacterial+infection&hl=en&as_sdt=2007
225	1	VR Rajpal, Y Dhingra, L Khungar, S Mehta, ...	Exploring Metal and metal-oxide nanoparticles for nanosensing and biotic stress management in plant systems	2024	Current Research in …	Elsevier	https://www.sciencedirect.com/science/article/pii/S2590262824000455	https://scholar.google.com/scholar?cites=7958181065860273111&as_sdt=2005&sciodt=2007&hl=en	225	2024-07-09 11:44:40	HTML								1	1	0	5	1	… The primary goal of plant disease management, therefore, remains largely focused on reducing the economic damage caused by bacterial, fungal, and viral pathogens; nematodes, …	https://www.sciencedirect.com/science/article/pii/S2590262824000455	https://scholar.google.com/scholar?q=related:11PX4IMjcW4J:scholar.google.com/&scioq=sapodila+bacterial+infection&hl=en&as_sdt=2007
226	0	AE Putra	Role of nutritional status in multidrug-resistant tuberculosis in Indonesia: a systematic review	2022	Editorial Board Bali Medical Journal	researchgate.net	https://www.researchgate.net/profile/Yusra-Pintaningrum/publication/376199183_Hypertension_in_mortality_and_morbidity_of_COVID-19_A_systematic_review_and_meta-analysis_of_prospective_cohort_study/links/656ddb60b86a1d521b307f3a/Hypertension-in-mortality-and-morbidity-of-COVID-19-A-systematic-review-and-meta-analysis-of-prospective-cohort-study.pdf#page=46		226	2024-07-09 11:44:40	PDF								0	0	0	1	2	… ) is a pathogenic bacterium that causes infections in all parts of the body as reported worldwide. Individual management of carriers and patients infected with MRSA includes nasal …	https://www.researchgate.net/profile/Yusra-Pintaningrum/publication/376199183_Hypertension_in_mortality_and_morbidity_of_COVID-19_A_systematic_review_and_meta-analysis_of_prospective_cohort_study/links/656ddb60b86a1d521b307f3a/Hypertension-in-mortality-and-morbidity-of-COVID-19-A-systematic-review-and-meta-analysis-of-prospective-cohort-study.pdf#page=46	https://scholar.google.com/scholar?q=related:ubWQtmBDC44J:scholar.google.com/&scioq=sapodila+bacterial+infection&hl=en&as_sdt=2007
227	0	KA Martin	Investigation of compounds with activity against Tritrichomonas foetus trophozoites	2022		search.proquest.com	https://search.proquest.com/openview/b42eccfa59e19dfcdb6b561313a4f19f/1?pq-origsite=gscholar&cbl=18750&diss=y		227	2024-07-09 11:44:40									0	0	0	1	2	… The most common outcome of infection is early embryonic death, leading to a reduced calf … lavage was evaluated in a heifer calf infection model. Repurposing of available compounds …		https://scholar.google.com/scholar?q=related:j9V51Cwq_UQJ:scholar.google.com/&scioq=sapodila+bacterial+infection&hl=en&as_sdt=2007
228	94	A Gull, N Bhat, SM Wani, FA Masoodi, T Amin, ...	Shelf life extension of apricot fruit by application of nanochitosan emulsion coatings containing pomegranate peel extract	2021	Food chemistry	Elsevier	https://www.sciencedirect.com/science/article/pii/S0308814621001515	https://scholar.google.com/scholar?cites=13361410065924672375&as_sdt=2005&sciodt=2007&hl=en	228	2024-07-09 11:44:40									94	31.33	16	6	3	… as the percentage of fruits showing visible fungal infection. … at 5 C to determine the total psychrophilic bacterial count (TPBC). For … high TA of blueberry and sapodilla fruit during storage. …		https://scholar.google.com/scholar?q=related:d8vExalDbbkJ:scholar.google.com/&scioq=sapodila+bacterial+infection&hl=en&as_sdt=2007
229	2	V SETHA, HJI SU	Controlling Citrus Huanglongbing (HLB) for the Rehabilitation of Citrus Orchards in Cambodia	2011	International Journal of Environmental and Rural …	iserd.net	https://iserd.net/ijerd22/22006.pdf	https://scholar.google.com/scholar?cites=1478235867311631390&as_sdt=2005&sciodt=2007&hl=en	229	2024-07-09 11:44:40	PDF								2	0.15	1	2	13	… on HLB infection mechanism namely, insufficient elimination of infected citrus trees and transplanting HLB-infected … Citrus HLB disease caused by uncultivable pathogenic bacteria was …	https://iserd.net/ijerd22/22006.pdf	https://scholar.google.com/scholar?q=related:HuxZdbC_gxQJ:scholar.google.com/&scioq=sapodila+bacterial+infection&hl=en&as_sdt=2007
230	119	TY Thung, S Radu, NA Mahyudin, Y Rukayadi, ...	Prevalence, Virulence Genes and Antimicrobial Resistance Profiles of Salmonella Serovars from Retail Beef in Selangor, Malaysia	2018	Frontiers in …	frontiersin.org	https://www.frontiersin.org/articles/10.3389/fmicb.2017.02697/full	https://scholar.google.com/scholar?cites=4917779880259649388&as_sdt=2005&sciodt=2007&hl=en	230	2024-07-09 11:44:40	HTML	10.3389/fmicb.2017.02697							119	19.83	24	5	6	… In general, bacterial virulence factors have a crucial role for systemic infections. The pathogenicity of Salmonella strains has been related to numerous virulence genes present in the …	https://www.frontiersin.org/articles/10.3389/fmicb.2017.02697/full	https://scholar.google.com/scholar?q=related:bH9w3r52P0QJ:scholar.google.com/&scioq=sapodila+bacterial+infection&hl=en&as_sdt=2007
231	161	SV Irtwange	Application of modified atmosphere packaging and related technology in postharvest handling of fresh fruits and vegetables	2006	Agricultural Engineering International: CIGR Journal	cigrjournal.org	http://cigrjournal.org/index.php/Ejounral/article/download/691/685	https://scholar.google.com/scholar?cites=14358612981866258730&as_sdt=2005&sciodt=2007&hl=en	231	2024-07-09 11:44:40	PDF								161	8.94	161	1	18	… Fungi and bacteria are the two main sources of infection that may occur during the growing season… Bacteria gain entry through wounds or natural opening (such as stomata, lenticels, or …	http://cigrjournal.org/index.php/Ejounral/article/download/691/685	https://scholar.google.com/scholar?q=related:KmFzi24KRMcJ:scholar.google.com/&scioq=sapodila+bacterial+infection&hl=en&as_sdt=2007
232	22	SW Wessel, HC van der Mei, D Morando, AM Slomp, ...	Quantification and qualification of bacteria trapped in chewed gum	2015	Plos one	journals.plos.org	https://journals.plos.org/plosone/article?id=10.1371/journal.pone.0117191&xid=17259,15700023,15700186,15700190,15700248	https://scholar.google.com/scholar?cites=13790355042117694164&as_sdt=2005&sciodt=2007&hl=en	232	2024-07-09 11:44:40	HTML								22	2.44	4	5	9	… The first commercial chewing gum was not successfully marketed until the late 19 th century, when the rubbery tree sap of the Sapodilla tree formed the basis for gum manufacturing [1]. …	https://journals.plos.org/plosone/article?id=10.1371/journal.pone.0117191&xid=17259,15700023,15700186,15700190,15700248	https://scholar.google.com/scholar?q=related:1DLxq9guYb8J:scholar.google.com/&scioq=sapodila+bacterial+infection&hl=en&as_sdt=2007
233	0	RP Anthonappa	An in situ study to compare a fluoride chewing gum with a		Journal of Clinical Periodontology	researchgate.net	https://www.researchgate.net/profile/Robert-Anthonappa/publication/29843693_An_in_situ_study_to_compare_a_fluoride_chewing_gum_with_a_fluoride_dentifrice/links/0912f50f13e523114f000000/An-in-situ-study-to-compare-a-fluoride-chewing-gum-with-a-fluoride-dentifrice.pdf		233	2024-07-09 11:44:40	PDF								0	0	0	1		… bacterial infection that is dependent on a limited number of species of cariogenic bacteria, … introduced Thomas Adams to chicle (latex of the sapodilla tree), who then in 1871, patented a …	https://www.researchgate.net/profile/Robert-Anthonappa/publication/29843693_An_in_situ_study_to_compare_a_fluoride_chewing_gum_with_a_fluoride_dentifrice/links/0912f50f13e523114f000000/An-in-situ-study-to-compare-a-fluoride-chewing-gum-with-a-fluoride-dentifrice.pdf	https://scholar.google.com/scholar?q=related:ZCh6vBk8WM0J:scholar.google.com/&scioq=sapodila+bacterial+infection&hl=en&as_sdt=2007
234	0	T Zaheer	New, Simple, and Cost-Effective Synthesis of Green Nanotechnology in Anti-Microbial Applications	2022	Green Nanomaterials	taylorfrancis.com	https://www.taylorfrancis.com/chapters/edit/10.1201/9781003130314-6/new-simple-cost-effective-synthesis-green-nanotechnology-anti-microbial-applications-tean-zaheer		234	2024-07-09 11:44:40		10.1201/9781003130314-6							0	0	0	1	2	… bacteria have provided a useful alternative to anti-microbials. Inhibition of growth and multiplication in bacteria, … Fungal infections in human and animals present a great chal lenge in …		https://scholar.google.com/scholar?q=related:A1yKwQI_YSEJ:scholar.google.com/&scioq=sapodila+bacterial+infection&hl=en&as_sdt=2007
235	0	J Valera	Healthy Children		books.google.com		https://books.google.com/books?hl=en&lr=&id=fsSeMucv4kIC&oi=fnd&pg=PA11&dq=sapodila+bacterial+infection&ots=M4IGYLnRqr&sig=62Eh5TUukWQ7QNxmacuG5BKvPCw		235	2024-07-09 11:44:40	BOOK								0	0	0	1		… on the skin (face) reddened caused by infection with bacteria, these nodes are called boils. The boil is an abscess in the skin caused by a bacterial infection. (Staphylococcus), set in a …		https://scholar.google.com/scholar?q=related:ZEnXjWH8CfoJ:scholar.google.com/&scioq=sapodila+bacterial+infection&hl=en&as_sdt=2007
236	12	UR Pathipati, PL Kanuparthi	Silver nanoparticles for insect control: Bioassays and mechanisms	2021	Silver Nanomaterials for Agri-Food …	Elsevier	https://www.sciencedirect.com/science/article/pii/B978012823528700007X	https://scholar.google.com/scholar?cites=14658677512487853733&as_sdt=2005&sciodt=2007&hl=en	236	2024-07-09 11:44:40									12	4	6	2	3	… responsible for many bacterial, protozoan, helminthic diseases, and viral infections to humans … zapota (Sapotaceae) commonly known as sapodilla, an evergreen tree with edible fruits …		https://scholar.google.com/scholar?q=related:pV7YWIgVbssJ:scholar.google.com/&scioq=sapodila+bacterial+infection&hl=en&as_sdt=2007
237	0	EC Harvey	Technical information package on postharvest handling of perishables: volume 1, fruits	1986		idl-bnc-idrc.dspacedirect.org	https://idl-bnc-idrc.dspacedirect.org/bitstream/10625/37233/1/IDL-37233.pdf		237	2024-07-09 11:44:40	PDF								0	0	0	1	38	… 1 t lite are ripening, infection, moisture loss and the development … crop decay caused by fungi, bacteria and yeasts. The use of … Pest and Disease Control The sapodilla is relatively free of …	https://idl-bnc-idrc.dspacedirect.org/bitstream/10625/37233/1/IDL-37233.pdf	https://scholar.google.com/scholar?q=related:wPtCa_Qy0oEJ:scholar.google.com/&scioq=sapodila+bacterial+infection&hl=en&as_sdt=2007
238	129	HB Singh	Herbal medicine of Manipur: A colour Encyclopaedia	2003		Daya Books		https://scholar.google.com/scholar?cites=10061206485389801576&as_sdt=2005&sciodt=2007&hl=en	238	2024-07-09 11:44:40	CITATION								129	6.14	129	1	21			https://scholar.google.com/scholar?q=related:aPiD7f2VoIsJ:scholar.google.com/&scioq=sapodila+bacterial+infection&hl=en&as_sdt=2007
239	37	N Lall	Medicinal plants for holistic health and well-being	2017		books.google.com	https://books.google.com/books?hl=en&lr=&id=05CZDgAAQBAJ&oi=fnd&pg=PP1&dq=sapodila+bacterial+infection&ots=C87gz3VFHi&sig=Ve_HLpfwQdK8_GR5n3MJtVpMbp0	https://scholar.google.com/scholar?cites=11376576509151779620&as_sdt=2005&sciodt=2007&hl=en	239	2024-07-09 11:44:40	BOOK								37	5.29	37	1	7	… Biological carcinogens involve the development of cancer in accordance with infection of a virus, bacteria, or parasite. Chronic infections with viruses such as the hepatitis B and C …		https://scholar.google.com/scholar?q=related:JJsLNA-44Z0J:scholar.google.com/&scioq=sapodila+bacterial+infection&hl=en&as_sdt=2007
240	6	MA Mossler, ON Nesheim	Tropical fruit pest management strategic plan (PMSP)	2003		journals.flvc.org	https://journals.flvc.org/edis/article/download/110445/105639/153913	https://scholar.google.com/scholar?cites=9866308087773378118&as_sdt=2005&sciodt=2007&hl=en	240	2024-07-09 11:44:40	BOOK								6	0.29	3	2	21	… Pathologists believe that fungicide use in nurseries masks phytophthora infection, which … 20 acres of sapodilla in production. Insect management in sapodilla relies on natural predators …	https://journals.flvc.org/edis/article/download/110445/105639/153913	https://scholar.google.com/scholar?q=related:RrZLkO4q7IgJ:scholar.google.com/&scioq=sapodila+bacterial+infection&hl=en&as_sdt=2007
241	0	I Badshah, A Mustaq, SZ Malik, S Jahanabadi, ...	Diarylheptanoid and SAR-CoV-2	2023	Application of Natural …	Elsevier	https://www.sciencedirect.com/science/article/pii/B9780323950473000010		241	2024-07-09 11:44:40									0	0	0	5	1	… These medicinal plants have diverse secondary metabolites, which proved to be helpful in eradicating viral, bacterial, and protozoal infections. They are also being used in treating …		https://scholar.google.com/scholar?q=related:MzABnGz4Y7EJ:scholar.google.com/&scioq=sapodila+bacterial+infection&hl=en&as_sdt=2007
242	290	CA Cruz-Cruz, MT González-Arnao, F Engelmann	Biotechnology and conservation of plant biodiversity	2013	Resources	mdpi.com	https://www.mdpi.com/2079-9276/2/2/73	https://scholar.google.com/scholar?cites=14474217136150583480&as_sdt=2005&sciodt=2007&hl=en	242	2024-07-09 11:44:40	HTML								290	26.36	97	3	11	… infected with pathogens (eg, virus, phytoplasmas and endophytic bacteria), it is possible to dissect out a non-infected … mechanically to remove the infected tissues and of ensuring the …	https://www.mdpi.com/2079-9276/2/2/73	https://scholar.google.com/scholar?q=related:uJggMsy_3sgJ:scholar.google.com/&scioq=sapodila+bacterial+infection&hl=en&as_sdt=2007
243	2	NQM Al-Hajj	in vitro Evaluation of Antimicrobial and Antioxidant Activity of Carica papaya L. Seeds Grown in the Republic of Yemen	2021	Electronic Journal of University of Aden for Basic and …	ejua.net	https://ejua.net/index.php/EJUA-BA/article/view/103	https://scholar.google.com/scholar?cites=628720654892454105&as_sdt=2005&sciodt=2007&hl=en	243	2024-07-09 11:44:40									2	0.67	2	1	3	… These extracts are unmatched in their ability to be opted to treat bacterial and fungal infections. The safety of medicinal plants is not complete because their use in general exposes …	https://ejua.net/index.php/EJUA-BA/article/download/103/135	https://scholar.google.com/scholar?q=related:2dDQwRqquQgJ:scholar.google.com/&scioq=sapodila+bacterial+infection&hl=en&as_sdt=2007
244	4	H Aslam, A Khan, NG Qazi, F Ali, SS Hassan, ...	Pharmacological basis of bergapten in gastrointestinal diseases focusing on H+/K+ ATPase and voltage-gated calcium channel inhibition: A toxicological …	2022	Frontiers in …	frontiersin.org	https://www.frontiersin.org/articles/10.3389/fphar.2022.1005154/full	https://scholar.google.com/scholar?cites=15492555715897236597&as_sdt=2005&sciodt=2007&hl=en	244	2024-07-09 11:44:40	HTML	10.3389/fphar.2022.1005154							4	2	1	6	2	… pylori infection is most common in the adult population and has shown median prevalence … aggravating factors in GIT, many bacterial infections also cause this imbalance and contribute …	https://www.frontiersin.org/articles/10.3389/fphar.2022.1005154/full	https://scholar.google.com/scholar?q=related:dZwALVedANcJ:scholar.google.com/&scioq=sapodila+bacterial+infection&hl=en&as_sdt=2007
245	1	E Bonin, VD Avila, VM Carvalho, ...	Study of chemical constituents, antioxidants and antimicrobial activities of Tamarindus indica L. seed	2023	Journal of Food …	Wiley Online Library	https://ift.onlinelibrary.wiley.com/doi/abs/10.1111/1750-3841.16739	https://scholar.google.com/scholar?cites=10670618127193110536&as_sdt=2005&sciodt=2007&hl=en	245	2024-07-09 11:44:40		10.1111/1750-3841.16739							1	1	0	4	1	… Bacteria serve as the primary etiological agents of the majority of infectious diseases and … , pineapple (38.1 ± 0.7 mg gallic acid.100 g −1 ), sapodilla (13.5 ± 1.1 mg gallic acid.100 g −1 ), …		https://scholar.google.com/scholar?q=related:CHgwvaamFZQJ:scholar.google.com/&scioq=sapodila+bacterial+infection&hl=en&as_sdt=2007
246	0	VR Rajpal, Y Dhingra, L Khungar, S Mehta, ...	Current Research in Biotechnology	2024	Current Research in …	researchgate.net	https://www.researchgate.net/profile/Azamal-Husen/publication/380151591_Exploring_Metal_and_metal-oxide_nanoparticles_for_nanosensing_and_biotic_stress_management_in_plant_systems/links/663f280a35243041539742bf/Exploring-Metal-and-metal-oxide-nanoparticles-for-nanosensing-and-biotic-stress-management-in-plant-systems.pdf		246	2024-07-09 11:44:40	PDF								0	0	0	5	1	… largely focused on reducing the economic damage caused by bacterial, fungal, and viral pathogens; … Reduced symptoms of bacterial infection via upregulation of defense-related genes …	https://www.researchgate.net/profile/Azamal-Husen/publication/380151591_Exploring_Metal_and_metal-oxide_nanoparticles_for_nanosensing_and_biotic_stress_management_in_plant_systems/links/663f280a35243041539742bf/Exploring-Metal-and-metal-oxide-nanoparticles-for-nanosensing-and-biotic-stress-management-in-plant-systems.pdf	https://scholar.google.com/scholar?q=related:2axcxo6UPxsJ:scholar.google.com/&scioq=sapodila+bacterial+infection&hl=en&as_sdt=2007
247	8	N Weyandt, SA Aghdam, AMV Brown	Discovery of Early-Branching Wolbachia Reveals Functional Enrichment on Horizontally Transferred Genes	2022	Frontiers in Microbiology	frontiersin.org	https://www.frontiersin.org/articles/10.3389/fmicb.2022.867392/full	https://scholar.google.com/scholar?cites=8148793999575080731&as_sdt=2005&sciodt=2007&hl=en	247	2024-07-09 11:44:40	HTML	10.3389/fmicb.2022.867392							8	4	3	3	2	… Second, evidence suggests that plants specifically mediate free soluble lysine upon bacterial infection of leaves, first increasing lysine import then massively upregulating lysine …	https://www.frontiersin.org/articles/10.3389/fmicb.2022.867392/full	https://scholar.google.com/scholar?q=related:G9-B7PdUFnEJ:scholar.google.com/&scioq=sapodila+bacterial+infection&hl=en&as_sdt=2007
248	0	IA Amri, AD Rahmadzaky, MA Lesmana, ...	Advancing wound care: A hydrocarbon ointment formulated with Oregano vulgaris for antibacterial action against Staphylococcus aureus	2024	Tropical Journal of …	ajol.info	https://www.ajol.info/index.php/tjnpr/article/view/271668		248	2024-07-09 11:44:40									0	0	0	4	1	… infections due to bacteria, such as Staphylococcus aureus.Gram-positive Staphylococcus aureus bacteria have a … Ointment formulation and test safety from Sapodilla manila leaf extract (…	https://www.ajol.info/index.php/tjnpr/article/download/271668/256422	https://scholar.google.com/scholar?q=related:i2La2idJA3IJ:scholar.google.com/&scioq=sapodila+bacterial+infection&hl=en&as_sdt=2007
249	73	CM Lombardy Jr, DR Lombardy, ...	Effervescent chewing gum	2001	US Patent 6,235,318	Google Patents	https://patents.google.com/patent/US6235318B1/en	https://scholar.google.com/scholar?cites=11373221839402930551&as_sdt=2005&sciodt=2007&hl=en	249	2024-07-09 11:44:40									73	3.17	24	3	23	… Bacterial adherence to dental surfaces can be facilitated by several mechanisms. It is clear that eliminating bacterial … gum chicle, obtained from the sapodilla tree indigenous to Central …	https://patentimages.storage.googleapis.com/pdfs/US6235318.pdf	https://scholar.google.com/scholar?q=related:d5FTSQHN1Z0J:scholar.google.com/&scioq=sapodila+bacterial+infection&hl=en&as_sdt=2007
250	45	MF Raza, Z Yao, S Bai, Z Cai, H Zhang	Tephritidae fruit fly gut microbiome diversity, function and potential for applications	2020	Bulletin of Entomological …	cambridge.org	https://www.cambridge.org/core/journals/bulletin-of-entomological-research/article/tephritidae-fruit-fly-gut-microbiome-diversity-function-and-potential-for-applications/B93C44D7A5D9B4F07213B43929239567	https://scholar.google.com/scholar?cites=8377054502100747304&as_sdt=2005&sciodt=2007&hl=en	250	2024-07-09 11:44:40									45	11.25	9	5	4	… gut-associated bacteria communities and host … infected males with females that are either infected or uninfected with a different and incompatible Wolbachia strain (candidate bacterium …	https://www.researchgate.net/profile/Zhaohui-Cai-2/publication/339179457_Tephritidae_fruit_fly_gut_microbiome_diversity_function_and_potential_for_applications/links/5e4679cd299bf1cdb928d58f/Tephritidae-fruit-fly-gut-microbiome-diversity-function-and-potential-for-applications.pdf	https://scholar.google.com/scholar?q=related:KETNpa9GQXQJ:scholar.google.com/&scioq=sapodila+bacterial+infection&hl=en&as_sdt=2007
251	0	R Ubais, SSV Varsha, S Murugavelh	KINETICS OF BIOGAS GENERATION FROM FOOD WASTE USING A PLUG FLOW REACTOR		Biotechnology for sustainable …	researchgate.net	https://www.researchgate.net/profile/Sheik_Asraf_S/publication/324079432_DEVELOPMENT_OF_VALUE_ADDED_PRODUCTS_FROM_EXCESS_HARVEST_OF_FRUITS_AND_VEGETABLES/links/64a63a988de7ed28ba7c113b/DEVELOPMENT-OF-VALUE-ADDED-PRODUCTS-FROM-EXCESS-HARVEST-OF-FRUITS-AND-VEGETABLES.pdf#page=29		251	2024-07-09 11:44:40	PDF								0	0	0	3		… Using a novel substrate mixture consisting of potato peels, sapodilla peels, Kiwi peels and … antimicrobial activity against bacterial and fungal species causing Urinary Tract infection (UTI) …	https://www.researchgate.net/profile/Sheik_Asraf_S/publication/324079432_DEVELOPMENT_OF_VALUE_ADDED_PRODUCTS_FROM_EXCESS_HARVEST_OF_FRUITS_AND_VEGETABLES/links/64a63a988de7ed28ba7c113b/DEVELOPMENT-OF-VALUE-ADDED-PRODUCTS-FROM-EXCESS-HARVEST-OF-FRUITS-AND-VEGETABLES.pdf#page=29	https://scholar.google.com/scholar?q=related:IahJ26jgk0oJ:scholar.google.com/&scioq=sapodila+bacterial+infection&hl=en&as_sdt=2007
252	5	SA Mitchell, MH Ahmad	Agricultural biotechnology in the Caribbean.	2003		academia.edu	https://www.academia.edu/download/31303359/2003.Agri_Biotech_in_Caribbean_-_Mitchell.pdf	https://scholar.google.com/scholar?cites=7777030887405341311&as_sdt=2005&sciodt=2007&hl=en	252	2024-07-09 11:44:40	PDF								5	0.24	3	2	21	… • Development of anthurium lily (Anthurium andreanum) with increased resistance to bacterial infection (including Xanthomonas and Pseudomonas) using transformation methods and …	https://www.academia.edu/download/31303359/2003.Agri_Biotech_in_Caribbean_-_Mitchell.pdf	https://scholar.google.com/scholar?q=related:f0oJO2OQ7WsJ:scholar.google.com/&scioq=sapodila+bacterial+infection&hl=en&as_sdt=2007
253	66	A VARGA, J MOLNAR	BiOIOgical Activity Of FeijOa Peel EXtractS	2000	Anticancer research	libir.josai.ac.jp	https://libir.josai.ac.jp/il/user_contents/02/G0000284repository/pdf/JOS-02507005-20-4324.pdf	https://scholar.google.com/scholar?cites=1813469678842406052&as_sdt=2005&sciodt=2007&hl=en	253	2024-07-09 11:44:40	PDF								66	2.75	33	2	24	… , were infected with HIV-ImB at a multiplicity of infection (moi) … The collected bacterial colonies were diluted to 107 colony … To the solu6tion of the fractions, a suspension of bacteria was …	https://libir.josai.ac.jp/il/user_contents/02/G0000284repository/pdf/JOS-02507005-20-4324.pdf	https://scholar.google.com/scholar?q=related:pORXkhC9KhkJ:scholar.google.com/&scioq=sapodila+bacterial+infection&hl=en&as_sdt=2007
254	127	RS Gatewood	Endodontic materials	2007	Dental Clinics of North America	Elsevier	https://www.sciencedirect.com/science/article/pii/S0011853207000201	https://scholar.google.com/scholar?cites=7302002996984476860&as_sdt=2005&sciodt=2007&hl=en	254	2024-07-09 11:44:40									127	7.47	127	1	17	… Gutta percha is produced from the juice of trees of the sapodilla family, which are … of rendering the canal system free of tissue, bacteria and bacterial products, and dentinal debris. This …		https://scholar.google.com/scholar?q=related:vPQYwAntVWUJ:scholar.google.com/&scioq=sapodila+bacterial+infection&hl=en&as_sdt=2007
255	132	M Zaker	Natural plant products as eco-friendly fungicides for plant diseases control-a review.	2016		researchgate.net	https://www.researchgate.net/profile/Masoud-Zaker/publication/305816390_Natural_Plant_Products_as_Eco-friendly_Fungicides_for_Plant_Diseases_Control-_A_Review/links/57a9935f08aed1b22624d2e7/Natural-Plant-Products-as-Eco-friendly-Fungicides-for-Plant-Diseases-Control-A-Review.pdf	https://scholar.google.com/scholar?cites=14624712976233583493&as_sdt=2005&sciodt=2007&hl=en	255	2024-07-09 11:44:40	PDF								132	16.5	132	1	8	… They are synthesized by plants in response to microbial infection and are often found effective in vitro as antimicrobial substance against a wide array of microorganisms. Tannins are …	https://www.researchgate.net/profile/Masoud-Zaker/publication/305816390_Natural_Plant_Products_as_Eco-friendly_Fungicides_for_Plant_Diseases_Control-_A_Review/links/57a9935f08aed1b22624d2e7/Natural-Plant-Products-as-Eco-friendly-Fungicides-for-Plant-Diseases-Control-A-Review.pdf	https://scholar.google.com/scholar?q=related:hdNygvdq9coJ:scholar.google.com/&scioq=sapodila+bacterial+infection&hl=en&as_sdt=2007
256	0	O Braun-Falco, G Plewig, HH Wolff, WHC Burgdorf, ...	Protozoan Diseases	2000	Dermatology	Springer	https://link.springer.com/chapter/10.1007/978-3-642-97931-6_6		256	2024-07-09 11:44:40		10.1007/978-3-642-97931-6_6							0	0	0	5	24	… is a forest worker who harvests chicle from the sapodilla tree for chewing gum). Other regional … In mucocutaneous lesions, the secondary bacterial infection apparently helps destroy the …		https://scholar.google.com/scholar?q=related:I6uab3bBnJEJ:scholar.google.com/&scioq=sapodila+bacterial+infection&hl=en&as_sdt=2007
257	12	IY Sengun	Acetic acid bacteria in food fermentations	2015	Fermented Foods: Part	api.taylorfrancis.com	https://api.taylorfrancis.com/content/chapters/edit/download?identifierName=doi&identifierValue=10.1201/b19872-7&type=chapterpdf	https://scholar.google.com/scholar?cites=7789918224169962583&as_sdt=2005&sciodt=2007&hl=en	257	2024-07-09 11:44:40									12	1.33	12	1	9	… Microorganisms mainly involved in food fermentation processes are lactic acid bacteria (LAB), acetic acid bacteria (AAB), yeast and molds. Most of the food fermentations occur as …		https://scholar.google.com/scholar?q=related:Vwz-JFpZG2wJ:scholar.google.com/&scioq=sapodila+bacterial+infection&hl=en&as_sdt=2007
258	37	PK Pagare, CS Satpute, VM Jadhav, ...	Medicated chewing gum: A novel drug delivery system	2012	Journal of applied …	japsonline.com	https://japsonline.com/abstract.php?article_id=544&sts=2	https://scholar.google.com/scholar?cites=10987273578498539978&as_sdt=2005&sciodt=2007&hl=en	258	2024-07-09 11:44:40									37	3.08	9	4	12	… the tree resin (Chicle) from the sapodilla tree to clean their teeth and freshen their breath. … dental caries, antiplaque, fungal, and bacterial infections. Prevention and cure of oral diseases …	https://japsonline.com/admin/php/uploads/544_pdf.pdf	https://scholar.google.com/scholar?q=related:ysFwSBujepgJ:scholar.google.com/&scioq=sapodila+bacterial+infection&hl=en&as_sdt=2007
259	0	PK Saini, V Singh, M Singh, P Kaur	ENVIRONMENTAL SCIENCE ARCHIVES		academia.edu		https://www.academia.edu/download/100352181/ESA_Vol1_STI1_10_21.pdf		259	2024-07-09 11:44:40	PDF								0	0	0	4		Climacteric ripening in plum fruit is characterized by enhanced respiration rate accompanying by an autocatalytic ethylene production that results in fruit decay, loss of flavour and easily …	https://www.academia.edu/download/100352181/ESA_Vol1_STI1_10_21.pdf	https://scholar.google.com/scholar?q=related:xH0cMuGmLnEJ:scholar.google.com/&scioq=sapodila+bacterial+infection&hl=en&as_sdt=2007
260	0	AO Ali	The Effect of Chewing Gum on Periodontal Disease						260	2024-07-09 11:44:40	CITATION								0	0	0	1				https://scholar.google.com/scholar?q=related:z5btkwBkFf8J:scholar.google.com/&scioq=sapodila+bacterial+infection&hl=en&as_sdt=2007
261	0	GI Johnson	Australian Centre for International Agricultural Research, GPO Box 1571, Canberra, 2601, Australia. Fax 61 62170501 Additional index words: Dothiorella …		researchgate.net		https://www.researchgate.net/profile/Greg-Johnson-6/publication/224907052_Mango_disease_losses_Balancing_economy_and_ecology/links/0912f4fa8857a30562000000/Mango-disease-losses-Balancing-economy-and-ecology.pdf		261	2024-07-09 11:44:40	PDF								0	0	0	1		… of one species of bacteria. The larvae are thought to consume the bacteria which in turn … the inoculum available for infection, whatever the mode of infection. • Lower inoculum levels …	https://www.researchgate.net/profile/Greg-Johnson-6/publication/224907052_Mango_disease_losses_Balancing_economy_and_ecology/links/0912f4fa8857a30562000000/Mango-disease-losses-Balancing-economy-and-ecology.pdf	https://scholar.google.com/scholar?q=related:Lnol_mz7Ra8J:scholar.google.com/&scioq=sapodila+bacterial+infection&hl=en&as_sdt=2007
262	0	R Marte, I Barbados	THE FRUIT PLANT PROPAGATION PROCESS AND ITS RELATION WITH THE PREVENTION OF PESTS AND DISEASES		Pests and Diseases as Constraints in the …	books.google.com	https://books.google.com/books?hl=en&lr=&id=T-Fq116IJ2oC&oi=fnd&pg=PA10-IA2&dq=sapodila+bacterial+infection&ots=-w6eIFOzlw&sig=KAkqfzj6zkeRbrIMXznFvf6K-_8		262	2024-07-09 11:44:40	HTML								0	0	0	2		… , it is with other diseases and pests caused by fungi, bacteria, mycoplasma and insects. … in the medium) contribute to the increase of infection by pest and diseases of the nursery plants. …	https://books.google.com/books?hl=en&lr=&id=T-Fq116IJ2oC&oi=fnd&pg=PA10-IA2&dq=sapodila+bacterial+infection&ots=-w6eIFOzlw&sig=KAkqfzj6zkeRbrIMXznFvf6K-_8	https://scholar.google.com/scholar?q=related:oi1TlhS0alwJ:scholar.google.com/&scioq=sapodila+bacterial+infection&hl=en&as_sdt=2007
263	2	V Tare, T Vijay	Dental Care &Oral Hygiene	2002		books.google.com	https://books.google.com/books?hl=en&lr=&id=O0hL9QczVPYC&oi=fnd&pg=PT9&dq=sapodila+bacterial+infection&ots=CfMiGcAcKq&sig=1tCD4IQpbQbwBDrdtCuN7YPx3Tw	https://scholar.google.com/scholar?cites=3464604091813358483&as_sdt=2005&sciodt=2007&hl=en	263	2024-07-09 11:44:40	BOOK								2	0.09	1	2	22	… are subjected to mechanical, chemical and bacterial infection. The oral tissues with endocrinal … Take banana &sapodilla (chiku), it will be a pleasure if you give him fruit salad with lots of …		https://scholar.google.com/scholar?q=related:k2vmsxC_FDAJ:scholar.google.com/&scioq=sapodila+bacterial+infection&hl=en&as_sdt=2007
264	24	IH Handayani, H Mochammad, ...	Molecular Impact on High Motility Group Box-1 (HMGB-1) in Pamps and Damp.	2019	Indian Journal of …	search.ebscohost.com	https://search.ebscohost.com/login.aspx?direct=true&profile=ehost&scope=site&authtype=crawler&jrnl=09760245&AN=139753340&h=g1cddP3Dvwwj6xlprgkq%2Bm81U54TRV4qxpOYOVo7wWwsj%2FZ0voJD1PQ5ka6GLjdymtsleD39b4hSEl1SsPU7iQ%3D%3D&crl=c	https://scholar.google.com/scholar?cites=626162885639262318&as_sdt=2005&sciodt=2007&hl=en	264	2024-07-09 11:44:40									24	4.8	8	3	5	… to infection. Strengthens the role of beneficial intracellular HMGB1 in immunity to infection … HMGB1 release, which facilitates leukocyte recruitment to eliminate invading bacteria …		https://scholar.google.com/scholar?q=related:btAPstOTsAgJ:scholar.google.com/&scioq=sapodila+bacterial+infection&hl=en&as_sdt=2007
265	0	S Ketsa	Saichol Ketsa 1 and Robert E Paull 2		textarchive.ru		https://textarchive.ru/c-2713864-pall.html		265	2024-07-09 11:44:40	HTML								0	0	0	1		… storage temperature is essential to avoid infection. … Salad greens are typically susceptible to the same bacterial … Sapodilla fruit are prized for pleasant aroma and sweet taste. Fruit growth …	https://textarchive.ru/c-2713864-pall.html	https://scholar.google.com/scholar?q=related:20dB5wWsbskJ:scholar.google.com/&scioq=sapodila+bacterial+infection&hl=en&as_sdt=2007
266	9	K Gururaja, M David	Spectroscopic signature, antibacterial and anticancer properties of Calotropis gigantea (Linn.) flower	2016	International Journal of Pharmaceutical …	academia.edu	https://www.academia.edu/download/53824311/SPECTROSCOPIC_SIGNATURE__ANTIBACTERIAL_AND_ANTICANCER_PROPERTIES_OF_CALOTROPIS_GIGANTEA_LINN._FLOWER.pdf	https://scholar.google.com/scholar?cites=4035292253062430806&as_sdt=2005&sciodt=2007&hl=en	266	2024-07-09 11:44:40	PDF								9	1.13	5	2	8	… bacteria (Escherichia coli and Klebsiella pneumoniae).The test bacteria are known to cause severe infections … AECF is capable of inhibiting the bacterial growth and may possibly be …	https://www.academia.edu/download/53824311/SPECTROSCOPIC_SIGNATURE__ANTIBACTERIAL_AND_ANTICANCER_PROPERTIES_OF_CALOTROPIS_GIGANTEA_LINN._FLOWER.pdf	https://scholar.google.com/scholar?q=related:VgCsnOw8ADgJ:scholar.google.com/&scioq=sapodila+bacterial+infection&hl=en&as_sdt=2007
267	107	MA Uchôa	Fruit flies (Diptera: Tephritoidea): biology, host plants, natural enemies, and the implications to their natural control	2012	Integrated pest management and pest control …	books.google.com	https://books.google.com/books?hl=en&lr=&id=c1WRDwAAQBAJ&oi=fnd&pg=PA271&dq=sapodila+bacterial+infection&ots=8g1KW6rfU1&sig=-5YkcJvQ0dskstTR8XifwcZk4qM	https://scholar.google.com/scholar?cites=11547760601111095508&as_sdt=2005&sciodt=2007&hl=en	267	2024-07-09 11:44:40									107	8.92	107	1	12	… of parasitism is the damage caused by the scars left by the ovipositor of parasitoid, even when ovipositions failed, and the possibility of subsequent infections by viruses, bacteria, fungi, …	https://www.researchgate.net/profile/Marcelo-Larramendy/publication/283546498_Integrated_Pest_Management_and_Pest_Control_-_Current_and_Future_Tactics/links/563e278e08ae8d65c0142e9b/Integrated-Pest-Management-and-Pest-Control-Current-and-Future-Tactics.pdf#page=285	https://scholar.google.com/scholar?q=related:1Gh6hBXjQaAJ:scholar.google.com/&scioq=sapodila+bacterial+infection&hl=en&as_sdt=2007
268	454	AA Kader, RS Rolle	The role of post-harvest management in assuring the quality and safety of horticultural produce	2004		books.google.com	https://books.google.com/books?hl=en&lr=&id=YAAxcjU3MhIC&oi=fnd&pg=PA35&dq=sapodila+bacterial+infection&ots=KsWWEDqdb0&sig=67f45OQ6zkwpHLtPdAyYnpeiSDE	https://scholar.google.com/scholar?cites=5594582402556707694&as_sdt=2005&sciodt=2007&hl=en	268	2024-07-09 11:44:40	BOOK								454	22.7	227	2	20	… Fungi and bacteria may infect the plant organ at any time. "Latent” infections, in which fungi invade fruit tissues shortly after flowering, become apparent only at the onset of ripening. Post…	https://books.google.com/books?hl=en&lr=&id=YAAxcjU3MhIC&oi=fnd&pg=PA35&dq=sapodila+bacterial+infection&ots=KsWWEDqdb0&sig=67f45OQ6zkwpHLtPdAyYnpeiSDE	https://scholar.google.com/scholar?q=related:bkMLww3zo00J:scholar.google.com/&scioq=sapodila+bacterial+infection&hl=en&as_sdt=2007
269	3	G Fischer, F Casierra-Posada, M Blanke	Impact of waterlogging on fruit crops in the era of climate change, with emphasis on tropical and subtropical species: A review	2023	Agronomía Colombiana	scielo.org.co	http://www.scielo.org.co/scielo.php?pid=S0120-99652023000200005&script=sci_arttext	https://scholar.google.com/scholar?cites=7169304882186925110&as_sdt=2005&sciodt=2007&hl=en	269	2024-07-09 11:44:40	HTML								3	3	1	3	1	… Because of flooding, the anaerobic conditions of the rhizosphere increase the conditions for phototoxicity and infection by pathogenic fungi and bacteria. Due to oxygen depletion in …	http://www.scielo.org.co/scielo.php?pid=S0120-99652023000200005&script=sci_arttext	https://scholar.google.com/scholar?q=related:NrQ5Rc58fmMJ:scholar.google.com/&scioq=sapodila+bacterial+infection&hl=en&as_sdt=2007
270	6	V Kumar, B Koul, P Taak, D Yadav, M Song	Journey of Trichoderma from Pilot Scale to Mass Production: A Review	2023	Agriculture	mdpi.com	https://www.mdpi.com/2077-0472/13/10/2022	https://scholar.google.com/scholar?cites=2242531319349720645&as_sdt=2005&sciodt=2007&hl=en	270	2024-07-09 11:44:40	HTML								6	6	1	5	1	… becomes infected with other bacteria or viruses. In the case of the H 2 O preservation method, the culture can be recovered even after 12 months without losing its potency [156,157]. …	https://www.mdpi.com/2077-0472/13/10/2022	https://scholar.google.com/scholar?q=related:RTaHf1oSHx8J:scholar.google.com/&scioq=sapodila+bacterial+infection&hl=en&as_sdt=2007
271	0	JS Rubin	Specialty Pharmaceutically Active Agent Composites	2021	US Patent App. 17/144,452	Google Patents	https://patents.google.com/patent/US20210213080A1/en		271	2024-07-09 11:44:40									0	0	0	1	3	The present invention is a pharmaceutical cocktail of at least two botanical leaves (or extracts therefrom) specifically harvested from trees or plants that bear edible fruit, and including no …	https://patentimages.storage.googleapis.com/38/8d/79/6b0a1214dc8061/US20210213080A1.pdf	https://scholar.google.com/scholar?q=related:AN7Mdq5rrOkJ:scholar.google.com/&scioq=sapodila+bacterial+infection&hl=en&as_sdt=2007
272	1	G da Silva Amaral, H Dantas Dos Santos, ...	Evaluation of triterpenes isolated from stems of Pouteria macahensis TD Penn. against Proteus mirabilis	2019	Trends in …	tpr.shahrood.iau.ir	https://tpr.shahrood.iau.ir/article_666538.html	https://scholar.google.com/scholar?cites=383569823023626821&as_sdt=2005&sciodt=2007&hl=en	272	2024-07-09 11:44:40									1	0.2	0	3	5	… resistant bacteria has long been of great interest for researchers. The bacteria resistance to … , which causes urinary infections, especially in patients with urinary system illnesses. This …	https://tpr.shahrood.iau.ir/article_666538_24f0ef41a34a84186e0700f0919e8bfa.pdf	https://scholar.google.com/scholar?q=related:Rfrhx7i2UgUJ:scholar.google.com/&scioq=sapodila+bacterial+infection&hl=en&as_sdt=2007
273	34	R Crozzoli	Nematodes of tropical fruit crops in Venezuela	2009	Integrated management of fruit crops and forest …	Springer	https://link.springer.com/content/pdf/10.1007/978-1-4020-9858-1_2?pdf=chapter%20toc	https://scholar.google.com/scholar?cites=483961375806604697&as_sdt=2005&sciodt=2007&hl=en	273	2024-07-09 11:44:40		10.1007/978-1-4020-9858-1_2							34	2.27	34	1	15	… Infected feeder roots have a dirty appearance due to soil … Numerous organisms ie fungi and bacteria can also invade … Sapodilla is grown principally in the Zulia State (about 1500 …		https://scholar.google.com/scholar?q=related:mUX2oU5gtwYJ:scholar.google.com/&scioq=sapodila+bacterial+infection&hl=en&as_sdt=2007
274	68	Z Yang, X Zou, Z Li, X Huang, X Zhai, W Zhang, ...	Improved postharvest quality of cold stored blueberry by edible coating based on composite gum arabic/roselle extract	2019	Food and Bioprocess …	Springer	https://link.springer.com/article/10.1007/s11947-019-02312-z	https://scholar.google.com/scholar?cites=18195640683102295183&as_sdt=2005&sciodt=2007&hl=en	274	2024-07-09 11:44:40		10.1007/s11947-019-02312-z							68	13.6	10	7	5	… The infected blueberries were considered based on the visible lesion and … aerobic bacteria. After 12 days of storage, coated fruits showed significantly lower mesophilic aerobic bacteria …		https://scholar.google.com/scholar?q=related:j1T18Mvmg_wJ:scholar.google.com/&scioq=sapodila+bacterial+infection&hl=en&as_sdt=2007
275	0	MA Mossler, ON Nesheim	Tropical Fruit Pest Management Strategic Plan (PMSP): Cir1442/PI062, 11/2003	2004	EDIS	journals.flvc.org	https://journals.flvc.org/edis/article/download/110445/105639		275	2024-07-09 11:44:40	PDF								0	0	0	2	20	… Pathologists believe that fungicide use in nurseries masks phytophthora infection, which … 20 acres of sapodilla in production. Insect management in sapodilla relies on natural predators …	https://journals.flvc.org/edis/article/download/110445/105639	https://scholar.google.com/scholar?q=related:i5d9mGP82uEJ:scholar.google.com/&scioq=sapodila+bacterial+infection&hl=en&as_sdt=2007
276	93	C de Jesús-Pires, JRC Ferreira-Neto, ...	Plant thaumatin-like proteins: function, evolution and biotechnological applications	2020	Current Protein and …	ingentaconnect.com	https://www.ingentaconnect.com/content/ben/cpps/2020/00000021/00000001/art00006	https://scholar.google.com/scholar?cites=1485514993083247427&as_sdt=2005&sciodt=2007&hl=en	276	2024-07-09 11:44:40									93	23.25	31	3	4	… TLP expression is also regulated in response to certain stress factors such as drought [16], wounding [17], freezing [18], as well as under infection by virus or bacteria [19]. However, its …	https://www.researchgate.net/profile/Ederson-Kido/publication/331867634_Plant_Thaumatin-like_Proteins_Function_Evolution_and_Biotechnological_Applications/links/5db18fad4585155e27f8abca/Plant-Thaumatin-like-Proteins-Function-Evolution-and-Biotechnological-Applications.pdf	https://scholar.google.com/scholar?q=related:Q2s-_wOcnRQJ:scholar.google.com/&scioq=sapodila+bacterial+infection&hl=en&as_sdt=2007
277	28	C Sowa, M Annawald, L Ovando	Coating composition for fresh produce comprising chitosan, surfactant and polyethylene glycol	2012	US Patent App. 13/515,569	Google Patents	https://patents.google.com/patent/US20120251675/en	https://scholar.google.com/scholar?cites=3762796392131942322&as_sdt=2005&sciodt=2007&hl=en	277	2024-07-09 11:44:40									28	2.33	9	3	12	The present invention relates to a method for coating food products comprising the application of an aqueous coating composition to the surface of the food product. A further subject is …	https://patentimages.storage.googleapis.com/f0/e2/70/f388e5c1e035fc/US20120251675A1.pdf	https://scholar.google.com/scholar?q=related:slcl62EjODQJ:scholar.google.com/&scioq=sapodila+bacterial+infection&hl=en&as_sdt=2007
278	10	GD Ruehle	The Sapodilla in Florida.	1951		cabidigitallibrary.org	https://www.cabidigitallibrary.org/doi/full/10.5555/19541101943	https://scholar.google.com/scholar?cites=13794027593112913320&as_sdt=2005&sciodt=2007&hl=en	278	2024-07-09 11:44:40		10.5555/19541101943							10	0.14	10	1	73	… Sapodilla trees (Achras zapota[Manilkara zapota]) in Florida are affected by rust (? Uredo … A species of Septoria is believed to be responsible for defoliation of sapodilla trees in Palm …		https://scholar.google.com/scholar?q=related:qIVuFQM7br8J:scholar.google.com/&scioq=sapodila+bacterial+infection&hl=en&as_sdt=2007
279	3	N Ramchundar, M Nlooto	A comparative qualitative study of the types of traditional treatment of fractures by traditional health practitioners in KwaZulu-Natal, South Africa and the north …	2020	International Journal	researchgate.net	https://www.researchgate.net/profile/Nireshnee-Ramchundar/publication/348167430_A_COMPARATIVE_QUALITATIVE_STUDY_OF_THE_TYPES_OF_TRADITIONAL_TREATMENT_OF_FRACTURES_BY_TRADITIONAL_HEALTH_PRACTITIONERS_IN_KWAZULU-NATAL_SOUTH_AFRICA_AND_THE_NORTH_ISLAND_OF_NEW_ZEALAND_A_SURVEY-BASED_/links/6000176245851553a0419826/A-COMPARATIVE-QUALITATIVE-STUDY-OF-THE-TYPES-OF-TRADITIONAL-TREATMENT-OF-FRACTURES-BY-T…	https://scholar.google.com/scholar?cites=2936859707464981394&as_sdt=2005&sciodt=2007&hl=en	279	2024-07-09 11:44:40	PDF								3	0.75	2	2	4	… Wound healing is sometimes prolonged because of infection, and in this study Izinyanga (Zulu herbalists) reported Isiturmeric (Curcuma longa) paste to be used on open wounds and …	https://www.researchgate.net/profile/Nireshnee-Ramchundar/publication/348167430_A_COMPARATIVE_QUALITATIVE_STUDY_OF_THE_TYPES_OF_TRADITIONAL_TREATMENT_OF_FRACTURES_BY_TRADITIONAL_HEALTH_PRACTITIONERS_IN_KWAZULU-NATAL_SOUTH_AFRICA_AND_THE_NORTH_ISLAND_OF_NEW_ZEALAND_A_SURVEY-BASED_/links/6000176245851553a0419826/A-COMPARATIVE-QUALITATIVE-STUDY-OF-THE-TYPES-OF-TRADITIONAL-TREATMENT-OF-FRACTURES-BY-T…	https://scholar.google.com/scholar?q=related:kpubAljSwSgJ:scholar.google.com/&scioq=sapodila+bacterial+infection&hl=en&as_sdt=2007
280	0	AK Palu, BJ West, CJ Jensen	Formulations and methods for inhibiting anaerobes, gram negative bacteria, protozoa and other microbial growth with morinda citrifolia l. enhanced formulations	2009	US Patent App. 12/167,011	Google Patents	https://patents.google.com/patent/US20090011057A1/en		280	2024-07-09 11:44:40									0	0	0	3	15	… have also been shown to be sources of infection to humans. However, investigations of … of the bacterium; this is more likely if the household has contact with an infection source, for …	https://patentimages.storage.googleapis.com/dd/c8/12/f32b85474c7445/US20090011057A1.pdf	https://scholar.google.com/scholar?q=related:OHkw0ipPk7EJ:scholar.google.com/&scioq=sapodila+bacterial+infection&hl=en&as_sdt=2007
281	124	RHL Disney	Observations on a zoonosis: leishmaniasis in British Honduras	1968	Journal of Applied Ecology	JSTOR	https://www.jstor.org/stable/2401273	https://scholar.google.com/scholar?cites=2453698828826003768&as_sdt=2005&sciodt=2007&hl=en	281	2024-07-09 11:44:40									124	2.21	124	1	56	… flaviscutellata typically had bacteria in the rear half of the hindgut. All L. flaviscutellata infected with leptomonads have had bacteria in the hindgut and the infected L. permira had a light …		https://scholar.google.com/scholar?q=related:OEn3pRVKDSIJ:scholar.google.com/&scioq=sapodila+bacterial+infection&hl=en&as_sdt=2007
282	5	N Kumar, Pratibha, Neeraj	Functional properties of pomegranate peel in edible coating/film: A review	2020	International Journal of …	inderscienceonline.com	https://www.inderscienceonline.com/doi/abs/10.1504/IJPTI.2020.110422	https://scholar.google.com/scholar?cites=9707273767864207376&as_sdt=2005&sciodt=2007&hl=en	282	2024-07-09 11:44:40		10.1504/IJPTI.2020.110422							5	1.25	2	3	4	… The control of bacterial infections on fruit and vegetable diseases has made a huge contribution to reducing the losses before and after production. Natural antimicrobials have proved …		https://scholar.google.com/scholar?q=related:EIgDfw8qt4YJ:scholar.google.com/&scioq=sapodila+bacterial+infection&hl=en&as_sdt=2007
283	2	X Niu, Q Xu, W Wang, Z Yu, Z Liu, C Qu, Y Liu, ...	The antifungal activity of a thaumatin-like protein from oyster Crassostrea gigas	2018	Invertebrate Survival …	isj.unimore.it	https://www.isj.unimore.it/index.php/ISJ/article/view/427	https://scholar.google.com/scholar?cites=11858073574628077094&as_sdt=2005&sciodt=2007&hl=en	283	2024-07-09 11:44:40									2	0.33	0	8	6	… play a vital role in defensing against fungal infection in C. … by the presence of bacteria or the bacterial simulacrum. It was … an allergen in sapodilla plum (Manilkara zapota). Mol. Nutr. …	https://www.isj.unimore.it/index.php/ISJ/article/download/427/407	https://scholar.google.com/scholar?q=related:Ji4n4BZXkKQJ:scholar.google.com/&scioq=sapodila+bacterial+infection&hl=en&as_sdt=2007
284	6	C Conser	Invasive Species Pathway Risk Analysis for California	2013	University of California, Davis	iscc.ca.gov	https://www.iscc.ca.gov/docs/reports/CISAC-Pathway-Report-July-2013-web.pdf	https://scholar.google.com/scholar?cites=8694147521398155205&as_sdt=2005&sciodt=2007&hl=en	284	2024-07-09 11:44:40	PDF								6	0.55	6	1	11	… The species also has been reared experimentally from Achras sapota (sapodilla), Annona glabra (pond-apple), Chrysobalanus icaco (cocoplum), Passiflora quadrangularis (a passion…	https://www.iscc.ca.gov/docs/reports/CISAC-Pathway-Report-July-2013-web.pdf	https://scholar.google.com/scholar?q=related:xafHbRvRp3gJ:scholar.google.com/&scioq=sapodila+bacterial+infection&hl=en&as_sdt=2007
285	2	V Cassoni, MP Cereda	Prospecting of culturable acetic acid bacteria from fermented fruits	2013	Journal of Biotechnology and Biodiversity			https://scholar.google.com/scholar?cites=17550417211892908042&as_sdt=2005&sciodt=2007&hl=en	285	2024-07-09 11:44:40	CITATION								2	0.18	1	2	11		https://www.researchgate.net/profile/Marney-Cereda/publication/334639363_Prospecting_of_culturable_acetic_acid_bacteria_from_fermented_fruits/links/5fd2b2c592851c00f8661de5/Prospecting-of-culturable-acetic-acid-bacteria-from-fermented-fruits.pdf?_sg%5B0%5D=started_experiment_milestone&origin=journalDetail&_rtd=e30%3D	https://scholar.google.com/scholar?q=related:CkDH1nebj_MJ:scholar.google.com/&scioq=sapodila+bacterial+infection&hl=en&as_sdt=2007
286	1	R Singh	Fruit Bats: Their Importance, Threats and Conservation	2023	International Journal of Bio-resource and Stress …	indianjournals.com	https://www.indianjournals.com/ijor.aspx?target=ijor:ijbsm&volume=14&issue=6&article=004	https://scholar.google.com/scholar?cites=15430295071662752304&as_sdt=2005&sciodt=2007&hl=en	286	2024-07-09 11:44:40									1	1	1	1	1	… Multiple bats developed hepatic abscesses but there was no evidence of a link between hemochromatosis and bacterial infection. Other studies revealed the concentrations of mercury (…	https://ojs.pphouse.org/index.php/IJBSM/article/download/4764/2376	https://scholar.google.com/scholar?q=related:MELrTZ1rI9YJ:scholar.google.com/&scioq=sapodila+bacterial+infection&hl=en&as_sdt=2007
287	11	MP Srivastava	Biochemical changes in certain tropical fruits during pathogenesis.	1969		cabidigitallibrary.org	https://www.cabidigitallibrary.org/doi/full/10.5555/19690307566	https://scholar.google.com/scholar?cites=6148195549578401197&as_sdt=2005&sciodt=2007&hl=en	287	2024-07-09 11:44:40		10.5555/19690307566							11	0.2	11	1	55	… Post-infection changes in the sugar and free amino acid contents of guava, mango and sapodilla fruits caused by their respective isolates of Botryodiplodia theobromae were studied …		https://scholar.google.com/scholar?q=related:rRVCHkfHUlUJ:scholar.google.com/&scioq=sapodila+bacterial+infection&hl=en&as_sdt=2007
288	25	C Hemmati, M Nikooei, AM Al-Subhi, AM Al-Sadi	History and current status of phytoplasma diseases in the Middle East	2021	Biology	mdpi.com	https://www.mdpi.com/2079-7737/10/3/226	https://scholar.google.com/scholar?cites=16001453747921683591&as_sdt=2005&sciodt=2007&hl=en	288	2024-07-09 11:44:40	HTML								25	8.33	6	4	3	… reported as a result of phytoplasma or bacterial diseases [9,10]. … -less pleomorphic phytopathogenic bacteria, annually destroying … In addition, transportation and the use of infected …	https://www.mdpi.com/2079-7737/10/3/226	https://scholar.google.com/scholar?q=related:hwS3hmeVEN4J:scholar.google.com/&scioq=sapodila+bacterial+infection&hl=en&as_sdt=2007
289	5	C La Mesa, A Corbo, A Gkouvi, ...	Bio-active principles from the animal and plant kingdom: A review	2020	Adv. Res. Org. Inorg …	corpuspublishers.com	https://www.corpuspublishers.com/assets/articles/aroic-v1-20-1001.pdf	https://scholar.google.com/scholar?cites=13088706298580451720&as_sdt=2005&sciodt=2007&hl=en	289	2024-07-09 11:44:40	PDF								5	1.25	1	4	4	… instance: fruit, leaves, bark and roots of Azadirachta indica have been reported to combat fungal infections, inflammation as well as viral and bacterial infections. Antitumor and …	https://www.corpuspublishers.com/assets/articles/aroic-v1-20-1001.pdf	https://scholar.google.com/scholar?q=related:iEFOGAhtpLUJ:scholar.google.com/&scioq=sapodila+bacterial+infection&hl=en&as_sdt=2007
290	0	VS Priebe	A survey of selected economic plants	1981		thekeep.eiu.edu	https://thekeep.eiu.edu/theses/2998/		290	2024-07-09 11:44:40									0	0	0	1	43	… The bacteria l infection of vegetables often results in the breakdown of tissue , caus ing soft rot of tubers , and/or the wi lting of leaves and stalk which in turn results in sma ller and fewer …	https://thekeep.eiu.edu/cgi/viewcontent.cgi?article=3995&context=theses	https://scholar.google.com/scholar?q=related:NlIk8j2z2QUJ:scholar.google.com/&scioq=sapodila+bacterial+infection&hl=en&as_sdt=2007
291	0	PPQ Form, PQ Tag	PPQ Form 547 Postentry Quarantine Tag		Postentry Quarantine Manual	Citeseer	https://citeseerx.ist.psu.edu/document?repid=rep1&type=pdf&doi=c890d7ec8c8e43da12550f02ebe3cd392fabb344#page=279		291	2024-07-09 11:44:40	PDF								0	0	0	2		… Use Table H-1 to determine when to look for symptoms of infections caused by bacteria, … subject to PEQ E-15 bacterial blight on pomegranate disease of Punica spp. 10-119 bacterial …	https://citeseerx.ist.psu.edu/document?repid=rep1&type=pdf&doi=c890d7ec8c8e43da12550f02ebe3cd392fabb344#page=279	https://scholar.google.com/scholar?q=related:59iZWlo3ovEJ:scholar.google.com/&scioq=sapodila+bacterial+infection&hl=en&as_sdt=2007
292	8	GI Johnson	Mango disease losses: balancing economy and ecology	1996	V International Mango Symposium 455	actahort.org	https://www.actahort.org/books/455/455_74.htm	https://scholar.google.com/scholar?cites=8877434314581156068&as_sdt=2005&sciodt=2007&hl=en	292	2024-07-09 11:44:40									8	0.29	8	1	28	… of one species of bacteria. The larvae are thought to consume the bacteria which in turn … the inoculum available for infection, whatever the mode of infection. • Lower inoculum levels …		https://scholar.google.com/scholar?q=related:5CB5dXn7MnsJ:scholar.google.com/&scioq=sapodila+bacterial+infection&hl=en&as_sdt=2007
293	4	K Goria, A Bharti, S Raina, R Kothari, VV Tyagi, ...	Low-cost adsorbent biomaterials for the remediation of inorganic and organic pollutants from industrial wastewater: Eco-friendly approach	2022	Sustainable Materials for …	Elsevier	https://www.sciencedirect.com/science/article/pii/B9780323994255000049	https://scholar.google.com/scholar?cites=8683347723528358570&as_sdt=2005&sciodt=2007&hl=en	293	2024-07-09 11:44:40									4	2	1	6	2	… Viruses are potentially considered more harmful pathogens present in wastewater as these are highly resistant, infectious, and unable to detect easily. However, bacteria are among the …		https://scholar.google.com/scholar?q=related:qsoair9ygXgJ:scholar.google.com/&scioq=sapodila+bacterial+infection&hl=en&as_sdt=2007
294	48	A Grumezescu, AM Holban	Value-Added Ingredients and Enrichments of Beverages: Volume 14: The Science of Beverages	2019		books.google.com	https://books.google.com/books?hl=en&lr=&id=iaaeDwAAQBAJ&oi=fnd&pg=PP1&dq=sapodila+bacterial+infection&ots=Qao_RP4HIv&sig=e9HM7MltIwHBC2bay2k0AuRYzqM	https://scholar.google.com/scholar?cites=8532480569289692726&as_sdt=2005&sciodt=2007&hl=en	294	2024-07-09 11:44:40	BOOK								48	9.6	24	2	5	… Juices from orange, watermelon, and sapodilla were verified as appropriate carrier for … of lactic acid bacteria (LAB) which are important for recovering from intestinal infections, improved …		https://scholar.google.com/scholar?q=related:NlZv6d51aXYJ:scholar.google.com/&scioq=sapodila+bacterial+infection&hl=en&as_sdt=2007
295	2	A Banerjee, E Pérez-López, K Mossman	Commentary: Phyllostomid bat microbiome composition is associated to host phylogeny and feeding strategies	2018	Frontiers in Microbiology	frontiersin.org	https://www.frontiersin.org/articles/10.3389/fmicb.2018.02863/full	https://scholar.google.com/scholar?cites=5915255681001902218&as_sdt=2005&sciodt=2007&hl=en	295	2024-07-09 11:44:40	HTML	10.3389/fmicb.2018.02863							2	0.33	1	3	6	… role in plant diseases such as sapodilla little leaf, yellow leaf … would identify if these bacteria remain viable while they pass … possible excretion of viable bacteria through bat guano and …	https://www.frontiersin.org/articles/10.3389/fmicb.2018.02863/full	https://scholar.google.com/scholar?q=related:itC6lbM1F1IJ:scholar.google.com/&scioq=sapodila+bacterial+infection&hl=en&as_sdt=2007
296	11	K Lu, Q Jin, Y Lin, W Lu, S Li, C Zhou, J Jin, ...	Cell-Free Fermentation Broth of Bacillus velezensis Strain S3-1 Improves Pak Choi Nutritional Quality and Changes the Bacterial Community Structure of the …	2020	Frontiers in …	frontiersin.org	https://www.frontiersin.org/articles/10.3389/fmicb.2020.02043/full	https://scholar.google.com/scholar?cites=18061381267284481711&as_sdt=2005&sciodt=2007&hl=en	296	2024-07-09 11:44:40	HTML	10.3389/fmicb.2020.02043							11	2.75	1	8	4	… However, in many reports, we observed that during the application of bacterial fluids, it … velezensis strain S3-1 treatment (S), the CFB treatment in the Pak choi, soil bacterial community …	https://www.frontiersin.org/articles/10.3389/fmicb.2020.02043/full	https://scholar.google.com/scholar?q=related:r9ZivZHqpvoJ:scholar.google.com/&scioq=sapodila+bacterial+infection&hl=en&as_sdt=2007
297	0	U Thenmoly	Development of multiplex pcr platform for simultaneous detection of selected foodborne pathogens/Thenmoly Utayakumaran	2019		studentsrepo.um.edu.my	http://studentsrepo.um.edu.my/id/eprint/12164		297	2024-07-09 11:44:40									0	0	0	1	5	… Such foodborne infections also could be due to consumption of food contaminated with pathogenic bacteria, virus or parasites. In general, eggs, meat, dairy products and vegetables …	http://studentsrepo.um.edu.my/12164/1/Thenmoly.pdf	https://scholar.google.com/scholar?q=related:Kh4FYtGG2AIJ:scholar.google.com/&scioq=sapodila+bacterial+infection&hl=en&as_sdt=2007
298	36	T Chandana, YP Venkatesh	Occurrence, functions and biological significance of arginine-rich proteins	2016	Current Protein and Peptide …	ingentaconnect.com	https://www.ingentaconnect.com/content/ben/cpps/2016/00000017/00000005/art00012	https://scholar.google.com/scholar?cites=4041878767694923240&as_sdt=2005&sciodt=2007&hl=en	298	2024-07-09 11:44:40									36	4.5	18	2	8	… also attributed to be potent antimicrobials against bacterial and fungal pathogens. Specially, … characterization of a basic thaumatin-like protein (TLP 2) as an allergen in sapodilla plum …	https://www.researchgate.net/profile/Yeldur-Venkatesh-2/publication/296057233_Occurrence_Functions_and_Biological_Significance_of_Arginine-Rich_Proteins/links/5762295508ae2b8d20ed65b6/Occurrence-Functions-and-Biological-Significance-of-Arginine-Rich-Proteins.pdf	https://scholar.google.com/scholar?q=related:6EWmDVOjFzgJ:scholar.google.com/&scioq=sapodila+bacterial+infection&hl=en&as_sdt=2007
299	1	JM Kneeland	Lipid biomarkers of coral stress: calibration and exploration	2011		dspace.mit.edu	https://dspace.mit.edu/handle/1721.1/68888	https://scholar.google.com/scholar?cites=14954232352167354673&as_sdt=2005&sciodt=2007&hl=en	299	2024-07-09 11:44:40									1	0.08	1	1	13	… coral skeleton, collected at Sapodilla Caye, Belize in 2005 GC-FID chromatogram of total lipid extract from Montastraea faveolata coral skeleton collected at Sapodilla Caye, Belize …	https://dspace.mit.edu/bitstream/handle/1721.1/68888/773366640-MIT.pdf?sequence=2	https://scholar.google.com/scholar?q=related:MeGW5xcbiM8J:scholar.google.com/&scioq=sapodila+bacterial+infection&hl=en&as_sdt=2007
300	2	CY Wang, N Ndraha, RS Wu, HY Liu, SW Lin, ...	An Overview of the Potential of Food-Based Carbon Dots for Biomedical Applications	2023	International Journal of …	mdpi.com	https://www.mdpi.com/1422-0067/24/23/16579	https://scholar.google.com/scholar?cites=7006736845770238710&as_sdt=2005&sciodt=2007&hl=en	300	2024-07-09 11:44:40	HTML								2	2	0	6	1	Food-based carbon dots (CDs) hold significant importance across various fields, ranging from biomedical applications to environmental and food industries. These CDs offer unique …	https://www.mdpi.com/1422-0067/24/23/16579	https://scholar.google.com/scholar?q=related:9qrGtgnuPGEJ:scholar.google.com/&scioq=sapodila+bacterial+infection&hl=en&as_sdt=2007
301	3	F Lin, EJ Kennelly, RG Linington, ...	Comprehensive Metabolite Profiling of Two Edible Garcinia Species Based on UPLC-ESI-QTOF-MSE Coupled with Bioactivity Assays	2023	Journal of Agricultural …	ACS Publications	https://pubs.acs.org/doi/abs/10.1021/acs.jafc.2c08372	https://scholar.google.com/scholar?cites=4117789325722441883&as_sdt=2005&sciodt=2007&hl=en	301	2024-07-09 11:44:40		10.1021/acs.jafc.2c08372							3	3	1	4	1	… new antibacterial agents and help to understand the traditional medical uses of GX to treat disorders related to bacterial infections, such as dysentery and gastrointestinal discomfort. (7) …		https://scholar.google.com/scholar?q=related:m9iUI5NTJTkJ:scholar.google.com/&scioq=sapodila+bacterial+infection&hl=en&as_sdt=2007
302	1	MC Kavinkumar, A Saravanakumar, ...	Sanitary Towels, Their Menace, and the Ministration of Herbalism: An Overview of the Feminine Pad Patron Mad Mady	2023	… journal of innovative …	researchgate.net	https://www.researchgate.net/profile/Arthanari-Saravanakumar/publication/371856228_Sanitary_Towels_Their_Menace_and_the_Ministration_of_Herbalism_An_Overview_of_the_Feminine_Pad_Patron_Mad_Mady/links/649922c68de7ed28ba58fa46/Sanitary-Towels-Their-Menace-and-the-Ministration-of-Herbalism-An-Overview-of-the-Feminine-Pad-Patron-Mad-Mady.pdf	https://scholar.google.com/scholar?cites=14370138406402657745&as_sdt=2005&sciodt=2007&hl=en	302	2024-07-09 11:44:40	PDF								1	1	0	3	1	… "Bamboo Kun" that inhibits bacteria growth and is antibacterial … , infection risk reduction, and increased circulation. Some types have a top layer made of plant components like sapodilla, …	https://www.researchgate.net/profile/Arthanari-Saravanakumar/publication/371856228_Sanitary_Towels_Their_Menace_and_the_Ministration_of_Herbalism_An_Overview_of_the_Feminine_Pad_Patron_Mad_Mady/links/649922c68de7ed28ba58fa46/Sanitary-Towels-Their-Menace-and-the-Ministration-of-Herbalism-An-Overview-of-the-Feminine-Pad-Patron-Mad-Mady.pdf	https://scholar.google.com/scholar?q=related:0Q3Ujr78bMcJ:scholar.google.com/&scioq=sapodila+bacterial+infection&hl=en&as_sdt=2007
303	0	JH Crane, CF Balerdi, MS Orfanedes	Tropical and Subtropical Fruit Crops for the Home Landscape: Alternatives to Citrus: HS812/MG373, rev. 10/2005	2006	EDIS	journals.flvc.org	https://journals.flvc.org/edis/article/download/116071/114254		303	2024-07-09 11:44:40	PDF								0	0	0	3	18	… Bacterial citrus canker and now citrus greening have ravaged citrus plantings throughout Miami-Dade and Broward Counties and much of south Florida. Infected … (guava and sapodilla) …	https://journals.flvc.org/edis/article/download/116071/114254	https://scholar.google.com/scholar?q=related:dBzqCJ5pHBYJ:scholar.google.com/&scioq=sapodila+bacterial+infection&hl=en&as_sdt=2007
304	9	DD Douds Jr, J Lee, JE Shenk, ...	Inoculation of sweet potatoes with AM fungi produced on-farm increases yield in high P soil	2015	Journal of Applied …	horticultureresearch.net	https://horticultureresearch.net/abs.php?a=2015	https://scholar.google.com/scholar?cites=14756333328582124501&as_sdt=2005&sciodt=2007&hl=en	304	2024-07-09 11:44:40	HTML								9	1	2	4	9	… allows the interaction of the bacterium and its metabolites with the … 522 fermented juice from two sapodilla varieties viz., Cricket … fatty acids during vinification of sapodilla juice. Methoxy …	https://horticultureresearch.net/abs.php?a=2015	https://scholar.google.com/scholar?q=related:1SNl3foGycwJ:scholar.google.com/&scioq=sapodila+bacterial+infection&hl=en&as_sdt=2007
305	0	IY Sengun, G Kilic	Innovative Functional Fruit and Vegetable-Based Drinks Including Probiotics	2019	Fermented Food Products	taylorfrancis.com	https://www.taylorfrancis.com/chapters/edit/10.1201/9780429274787-21/innovative-functional-fruit-vegetable-based-drinks-including-probiotics-ilkin-yucel-sengun-gulden-kilic		305	2024-07-09 11:44:40		10.1201/9780429274787-21							0	0	0	2	5	… Lactic acid bacteria and Bifidobacteria are formed in the majority of probiotics and some other bacteria … associated with Helicobacter pylori and enteric infections caused by C. difficile, …		https://scholar.google.com/scholar?q=related:fUnuOCIPGkQJ:scholar.google.com/&scioq=sapodila+bacterial+infection&hl=en&as_sdt=2007
306	80	S Mangaraj, TK Goswami	Modified atmosphere packaging of fruits and vegetables for extending shelf-life-A review	2009	Fresh produce	globalsciencebooks.info	http://www.globalsciencebooks.info/Online/GSBOnline/images/0906/FP_3(1)/FP_3(1)1-31o.pdf	https://scholar.google.com/scholar?cites=12844292892976547899&as_sdt=2005&sciodt=2007&hl=en	306	2024-07-09 11:44:40	PDF								80	5.33	40	2	15	… pH near to neutral, bacteria is the predominant microflora … bacterium is Erwina spp., which causes bacterial rots in vegetables. The pH of the fruits is below the level to support bacterial …	http://www.globalsciencebooks.info/Online/GSBOnline/images/0906/FP_3(1)/FP_3(1)1-31o.pdf	https://scholar.google.com/scholar?q=related:OwjxjFUYQLIJ:scholar.google.com/&scioq=sapodila+bacterial+infection&hl=en&as_sdt=2007
307	155	CF Pui, WC Wong, LC Chai, E Nillian, FM Ghazali, ...	Simultaneous detection of Salmonella spp., Salmonella Typhi and Salmonella Typhimurium in sliced fruits using multiplex PCR	2011	Food Control	Elsevier	https://www.sciencedirect.com/science/article/pii/S095671351000201X	https://scholar.google.com/scholar?cites=2948910240610217488&as_sdt=2005&sciodt=2007&hl=en	307	2024-07-09 11:44:40									155	11.92	26	6	13	This study aimed to determine the prevalence and quantity of Salmonella spp., Salmonella Typhi and Salmonella Typhimurium in sliced fruits from hawker stalls and hypermarkets in …	https://citeseerx.ist.psu.edu/document?repid=rep1&type=pdf&doi=5553efea7c9495dbc9c4c0cc1bf6054f6f7f2dd8	https://scholar.google.com/scholar?q=related:EG4VZj2i7CgJ:scholar.google.com/&scioq=sapodila+bacterial+infection&hl=en&as_sdt=2007
308	56	S Manzoor, A Gull, SM Wani, TA Ganaie, FA Masoodi, ...	Improving the shelf life of fresh cut kiwi using nanoemulsion coatings with antioxidant and antimicrobial agents	2021	Food Bioscience	Elsevier	https://www.sciencedirect.com/science/article/pii/S2212429221001401	https://scholar.google.com/scholar?cites=15996008976765545495&as_sdt=2005&sciodt=2007&hl=en	308	2024-07-09 11:44:40									56	18.67	9	6	3	… Dispersion of several concentrations of the antimicrobial agent in a combination with emulsion coatings successfully slowed bacteria, yeast and mold growth during storage, thus …		https://scholar.google.com/scholar?q=related:F-wR9Gk9_d0J:scholar.google.com/&scioq=sapodila+bacterial+infection&hl=en&as_sdt=2007
309	2	S Mitra, ÇU Serçe, M Gazel, S un Nabi, ...	Updates on phytoplasma diseases associated with fruit crops in Asia	2023	… diseases of major crops …	Elsevier	https://www.sciencedirect.com/science/article/pii/B9780323918978000095	https://scholar.google.com/scholar?cites=10227306135067665097&as_sdt=2005&sciodt=2007&hl=en	309	2024-07-09 11:44:40									2	2	0	5	1	… Losses to the quality and quantity of different fruits due to phytoplasma infection have now been widely reported from all over Asia. This chapter provides the most recent information on …		https://scholar.google.com/scholar?q=related:yaLhRb6w7o0J:scholar.google.com/&scioq=sapodila+bacterial+infection&hl=en&as_sdt=2007
310	0	T Utayakumaran	Development of Multiplex PCR Platform for Simultaneous Detection of Selected Foodborne Pathogens	2019		search.proquest.com	https://search.proquest.com/openview/6122ffb1032ca28c3c664ef4fefa7003/1?pq-origsite=gscholar&cbl=2026366&diss=y		310	2024-07-09 11:44:40									0	0	0	1	5	… Such foodborne infections also could be due to consumption of food contaminated with pathogenic bacteria, virus or parasites. In general, eggs, meat, dairy products and vegetables …		https://scholar.google.com/scholar?q=related:sK1hcolvxqQJ:scholar.google.com/&scioq=sapodila+bacterial+infection&hl=en&as_sdt=2007
311	8	HC Unanma, EG Anaduaka, NO Uchendu, ...	Ananas comosus and Citrus sinensis peels ameliorate CCl4-induced liver injury in Wistar rats	2021	Scientific African	Elsevier	https://www.sciencedirect.com/science/article/pii/S2468227621003276	https://scholar.google.com/scholar?cites=16514908683675074670&as_sdt=2005&sciodt=2007&hl=en	311	2024-07-09 11:44:40	HTML								8	2.67	2	4	3	Oxidative stress is implicated in the pathophysiology of a plethora of diseases. In this research, pilot studies were carried out in the methanol extracts of the ten fruit peels to screen for …	https://www.sciencedirect.com/science/article/pii/S2468227621003276	https://scholar.google.com/scholar?q=related:boB3tPK9MOUJ:scholar.google.com/&scioq=sapodila+bacterial+infection&hl=en&as_sdt=2007
312	82	CR Boning	Florida's best fruiting plants: Native and exotic trees, shrubs, and vines	2021		books.google.com	https://books.google.com/books?hl=en&lr=&id=v0wgEAAAQBAJ&oi=fnd&pg=PA2&dq=sapodila+bacterial+infection&ots=DkWvkHqqaK&sig=8FYN0fgja2hL9YrQug7OCOE8s4A	https://scholar.google.com/scholar?cites=16704467146809516726&as_sdt=2005&sciodt=2007&hl=en	312	2024-07-09 11:44:40	BOOK								82	27.33	82	1	3	… is a disease caused by the bacterial pathogen Xanthomonas axonopodis. Infection results in raised … The abiu is more distantly related to the sapodilla, Manilkara zapota, and star apple, …		https://scholar.google.com/scholar?q=related:tqLDr10w0ucJ:scholar.google.com/&scioq=sapodila+bacterial+infection&hl=en&as_sdt=2007
313	28	AS Khan	Medicinally important trees	2017		books.google.com	https://books.google.com/books?hl=en&lr=&id=5RgnDwAAQBAJ&oi=fnd&pg=PR7&dq=sapodila+bacterial+infection&ots=pdqnkrS3zB&sig=ltMh01kpl45VWDYveNTlhSlmaCA	https://scholar.google.com/scholar?cites=7123886110252498299&as_sdt=2005&sciodt=2007&hl=en	313	2024-07-09 11:44:40	BOOK								28	4	28	1	7	… Condensed tannins are capable of binding with the cell wall of ruminal bacteria and prevent … 2.2 (a, b) Antihyperglycemic activities of Achras sapota, sapodilla are due to the presence of …		https://scholar.google.com/scholar?q=related:e33wXawg3WIJ:scholar.google.com/&scioq=sapodila+bacterial+infection&hl=en&as_sdt=2007
314	3	D Wolfe, RA Gauthier	Longevity Now: A Comprehensive Approach to Healthy Hormones, Detoxification, Super Immunity, Reversing Calcification, and Total Rejuvenation	2013		North Atlantic Books		https://scholar.google.com/scholar?cites=3418868759706795242&as_sdt=2005&sciodt=2007&hl=en	314	2024-07-09 11:44:40	CITATION								3	0.27	2	2	11			https://scholar.google.com/scholar?q=related:6vwA5AVDci8J:scholar.google.com/&scioq=sapodila+bacterial+infection&hl=en&as_sdt=2007
315	0	G Karekalammanavar	Spectroscopic signature, antibacterial and anticancer properties of Calotropis gigantea flower extract		researchgate.net		https://www.researchgate.net/profile/Arvind-Singh-21/post/dear_friends_i_need_urgently_new_article_on_the_plant_genus_calotropis_asclepiadaceae_between_2014-2017/attachment/59d64e8c79197b80779a7e0b/AS%3A493198130388992%401494599005663/download/SPECTROSCOPIC+SIGNATURE%2C+ANTIBACTERIAL+AND+ANTICANCER+PROPERTIES+OF+CALOTROPIS+GIGANTEA+%28LINN.%29+FLOWER.pdf		315	2024-07-09 11:44:40	PDF								0	0	0	1		… bacteria (Escherichia coli and Klebsiella pneumoniae).The test bacteria are known to cause severe infections … AECF is capable of inhibiting the bacterial growth and may possibly be …	https://www.researchgate.net/profile/Arvind-Singh-21/post/dear_friends_i_need_urgently_new_article_on_the_plant_genus_calotropis_asclepiadaceae_between_2014-2017/attachment/59d64e8c79197b80779a7e0b/AS%3A493198130388992%401494599005663/download/SPECTROSCOPIC+SIGNATURE%2C+ANTIBACTERIAL+AND+ANTICANCER+PROPERTIES+OF+CALOTROPIS+GIGANTEA+%28LINN.%29+FLOWER.pdf	https://scholar.google.com/scholar?q=related:YRe_aJofLSwJ:scholar.google.com/&scioq=sapodila+bacterial+infection&hl=en&as_sdt=2007
316	3	X Chen, X Hu, J Zhang	Properties of an active film based on chitosan/silk fibroin loaded with an essential oil microemulsion and its application in preservation of strawberries	2024	Food Packaging and Shelf Life	Elsevier	https://www.sciencedirect.com/science/article/pii/S2214289424000358	https://scholar.google.com/scholar?cites=10753864362662646622&as_sdt=2005&sciodt=2007&hl=en	316	2024-07-09 11:44:40									3	3	1	3	1	… to aerobic bacteria. The SF-CEOM and SF-CS-CEOM groups were infected with mold starting … coatings containing essential oil effectively suppressed bacterial activity. These results are …		https://scholar.google.com/scholar?q=related:XlM9U6lmPZUJ:scholar.google.com/&scioq=sapodila+bacterial+infection&hl=en&as_sdt=2007
317	0	D Bai, JH Lee, K Cho, S Huh, S Park	Silver-Ionized Plant Extraction Liquid and Use Thereof	2008	US Patent App. 11/816,278	Google Patents	https://patents.google.com/patent/US20080213299A1/en		317	2024-07-09 11:44:40									0	0	0	5	16	… It was determined by using clear zone whether the bacteria grew or not, and the results are … It was determined by using clear zone whether the bacteria grew or not, and the results are …	https://patentimages.storage.googleapis.com/7e/f7/2d/0aa31c6a142d16/US20080213299A1.pdf	https://scholar.google.com/scholar?q=related:EWbQWY6WYgUJ:scholar.google.com/&scioq=sapodila+bacterial+infection&hl=en&as_sdt=2007
318	1	WC Kennard, HF Winters	Miscellaneous Publication	1960		books.google.com	https://books.google.com/books?hl=en&lr=&id=FrsjAQAAMAAJ&oi=fnd&pg=PA5&dq=sapodila+bacterial+infection&ots=Qmhk1uuzGO&sig=wgFQkcLhPMjzrEyD_55g0eo3IjE	https://scholar.google.com/scholar?cites=3310818039620101716&as_sdt=2005&sciodt=2007&hl=en	318	2024-07-09 11:44:40	BOOK								1	0.02	1	2	64	… Fungi and bacteria probably are responsible … sapodilla usually is propagated by seeds, which require 4 to 5 weeks to germinate. It also can be grafted or budded. Fruits of the sapodilla …	https://books.google.com/books?hl=en&lr=&id=FrsjAQAAMAAJ&oi=fnd&pg=PA5&dq=sapodila+bacterial+infection&ots=Qmhk1uuzGO&sig=wgFQkcLhPMjzrEyD_55g0eo3IjE	https://scholar.google.com/scholar?q=related:VOaCL3dj8i0J:scholar.google.com/&scioq=sapodila+bacterial+infection&hl=en&as_sdt=2007
319	1	JF Adams	OBSERVATIONS ON THE INFECTION OF CRATAEGUS BY GYMNOSPORANGIUM¹	1921	Mycologia	New York Botanical Garden.		https://scholar.google.com/scholar?cites=13643357245847667950&as_sdt=2005&sciodt=2007&hl=en	319	2024-07-09 11:44:40	CITATION								1	0.01	1	1	103			https://scholar.google.com/scholar?q=related:7oSAJiHxVr0J:scholar.google.com/&scioq=sapodila+bacterial+infection&hl=en&as_sdt=2007
320	20	E San-Blas, C Rosales, Á Torres	Entomopathogenic nematodes in tropical agriculture: current uses and their future in Venezuela	2015	… Pathogenesis of Insects and Other Pests …	Springer	https://link.springer.com/content/pdf/10.1007/978-3-319-18266-7.pdf#page=380	https://scholar.google.com/scholar?cites=2693342076064996743&as_sdt=2005&sciodt=2007&hl=en	320	2024-07-09 11:44:40		10.1007/978-3-319-18266-7							20	2.22	7	3	9	… with an emphasis in bacteria ( Bacillus thuringiensis Berliner [… a 5.5 ha of different varieties of sapodilla trees and 3 ha of red … serpentina could be attributed to the variety of the sapodilla …		https://scholar.google.com/scholar?q=related:h513JlmsYCUJ:scholar.google.com/&scioq=sapodila+bacterial+infection&hl=en&as_sdt=2007
321	0	R Fett	The Keystone Approach: Healing Arthritis and Psoriasis by Restoring the Microbiome	2017		books.google.com	https://books.google.com/books?hl=en&lr=&id=dVAmDwAAQBAJ&oi=fnd&pg=PT2&dq=sapodila+bacterial+infection&ots=EcFJgFfMfx&sig=k2Q_LiUMDqqOIc6wGP2ihyHzCLQ		321	2024-07-09 11:44:40	BOOK								0	0	0	1	7	… at which bacteria and other infections can enter the body. There are in fact billions of bacteria in … The immune system normally conducts surveillance for harmful bacteria by taking small …		https://scholar.google.com/scholar?q=related:6qXqDFzaiEgJ:scholar.google.com/&scioq=sapodila+bacterial+infection&hl=en&as_sdt=2007
322	0	AMV Marthe-EliseNgo-Matip, ...	Spirulina Platensis (Cyanobacteria algae) Enhances the Immune System, Reduces Inflammation and the Risk of Artherogenicity in HIV-1: A Cohort Study	2021	Conference …	greennetwork-events.com	https://www.greennetwork-events.com/all_images/file_719.pdf#page=28		322	2024-07-09 11:44:40	PDF								0	0	0	2	3	… the importance of neutralizing antibodies in EV71 infection and highlight the potential of the … contribution to the soil is made by Rhizobium bacteria. In organic farming systems, nitrogen …	https://www.greennetwork-events.com/all_images/file_719.pdf#page=28	https://scholar.google.com/scholar?q=related:e3wdI8k19DAJ:scholar.google.com/&scioq=sapodila+bacterial+infection&hl=en&as_sdt=2007
323	23	ML Ciavatta, P Devi, M Carbone, V Mathieu, R Kiss, ...	Kahalalide F analogues from the mucous secretion of Indian sacoglossan mollusc Elysia ornata	2016	Tetrahedron	Elsevier	https://www.sciencedirect.com/science/article/pii/S0040402015302544	https://scholar.google.com/scholar?cites=15143894200766975342&as_sdt=2005&sciodt=2007&hl=en	323	2024-07-09 11:44:40									23	2.88	4	6	8	… Since fungal diseases are second to bacterial infection that causes immense economic loss in agriculture and aquaculture, we also report here the in vitro antifungal activity of …	https://drs.nio.res.in/drs/bitstream/handle/2264/4902/Tetrahedron_72_625a.pdf?sequence=1&isAllowed=y	https://scholar.google.com/scholar?q=related:bk3QMIrrKdIJ:scholar.google.com/&scioq=sapodila+bacterial+infection&hl=en&as_sdt=2007
324	0	RS Hirlekar, A Gadkari	Indian Journal of Pharmaceutical Science &Research	2015	Indian Journal of Pharmaceutical Science & …	academia.edu	https://www.academia.edu/download/115188402/zip.pdf		324	2024-07-09 11:44:40	PDF								0	0	0	2	9	… The basic raw material for all CG is natural gum Chicle, obtained from the sapodilla tree. … , dental caries, antiplaque, fungal, and bacterial infections. Prevention and cure of oral diseases …	https://www.academia.edu/download/115188402/zip.pdf	https://scholar.google.com/scholar?q=related:SUCF7VcKuVkJ:scholar.google.com/&scioq=sapodila+bacterial+infection&hl=en&as_sdt=2007
325	0	D Botts	Celebrating 50 years of service to Specialty Crop Growers		ir4project.org		https://www.ir4project.org/wp-content/uploads/Newsletters/vol44no1.pdf		325	2024-07-09 11:44:40	PDF								0	0	0	1		… infection, flea bite saliva can cause strong allergic reactions, and scratching can open the skin to secondary infections… Death when fleas infected with the bacteria Yersinia pestis sought …	https://www.ir4project.org/wp-content/uploads/Newsletters/vol44no1.pdf	https://scholar.google.com/scholar?q=related:wiAteHSfUq4J:scholar.google.com/&scioq=sapodila+bacterial+infection&hl=en&as_sdt=2007
326	0	VC Pence, JA Sandoval	Victor M. Villalobos A. and Florent Engelmann, editors. 2002	2002	Appl. Microbiol	academia.edu	https://www.academia.edu/download/76448104/technicalbulletin7.pdf		326	2024-07-09 11:44:40	PDF								0	0	0	2	22	… A medium may also contain antimicrobial additives to retard the growth and destructive effects of bacteria and fungi. The potential side effects on the explant, however, must also be …	https://www.academia.edu/download/76448104/technicalbulletin7.pdf	https://scholar.google.com/scholar?q=related:vu5AXxYSAz4J:scholar.google.com/&scioq=sapodila+bacterial+infection&hl=en&as_sdt=2007
327	22	T de O Caretta, VA I Silveira, G Andrade, ...	Antimicrobial activity of sophorolipids produced by Starmerella bombicola against phytopathogens from cherry tomato	2022	Journal of the …	Wiley Online Library	https://onlinelibrary.wiley.com/doi/abs/10.1002/jsfa.11462	https://scholar.google.com/scholar?cites=16096445803106129014&as_sdt=2005&sciodt=2007&hl=en	327	2024-07-09 11:44:40		10.1002/jsfa.11462							22	11	6	4	2	… Then, the infection control and the treatments were wounded … the deterioration of chikoos (sapodilla), tomatoes, cucumbers … significant reduction in the bacterial growth in tomatoes was …		https://scholar.google.com/scholar?q=related:dtR34CwQYt8J:scholar.google.com/&scioq=sapodila+bacterial+infection&hl=en&as_sdt=2007
328	11	JB Kelly, DE Carlson, JS Low, T Rice, ...	The Relationship Between Microbiomes and Selective Regimes in the Sponge Genus Ircinia	2021	Frontiers in …	frontiersin.org	https://www.frontiersin.org/articles/10.3389/fmicb.2021.607289/full	https://scholar.google.com/scholar?cites=16138216127463448565&as_sdt=2005&sciodt=2007&hl=en	328	2024-07-09 11:44:40	HTML	10.3389/fmicb.2021.607289							11	3.67	2	5	3	… in nearly all gram-negative bacteria and has been coopted as a … to a population inhabiting the Sapodilla Cayes that appeared … populations in addition to the one at Sapodilla Cayes. …	https://www.frontiersin.org/articles/10.3389/fmicb.2021.607289/full	https://scholar.google.com/scholar?q=related:9V_wYRB29t8J:scholar.google.com/&scioq=sapodila+bacterial+infection&hl=en&as_sdt=2007
329	2	D Stevens, D Ware	Biotechnology of Horticultural Crops	2018		books.google.com	https://books.google.com/books?hl=en&lr=&id=W-LEDwAAQBAJ&oi=fnd&pg=PR11&dq=sapodila+bacterial+infection&ots=46rBUoDOjF&sig=_E0YQK7KWoXLCoOBDxJAAaxaueE	https://scholar.google.com/scholar?cites=872407879074359089&as_sdt=2005&sciodt=2007&hl=en	329	2024-07-09 11:44:40	BOOK								2	0.33	1	2	6	… In 1940, penicillin became available for medicinal use to treat bacterial infections in humans. The field of modern biotechnology is generally thought of as having been born in 1971 …		https://scholar.google.com/scholar?q=related:Mad6A1hqGwwJ:scholar.google.com/&scioq=sapodila+bacterial+infection&hl=en&as_sdt=2007
330	1	B Fernandes, L Pereira, T Pereira, ...	EVALUATION OF MURRAYA EXTRACTS FOR CONTROLLING FUNGI GROWTH ON ZAPOTA THROUGH ESTIMATION STUDIES	2012	International Journal of …	Citeseer	https://citeseerx.ist.psu.edu/document?repid=rep1&type=pdf&doi=af5152c7a7a2f77eaf3625bd7a24a7fe1bb45fa1	https://scholar.google.com/scholar?cites=11922176750679258311&as_sdt=2005&sciodt=2007&hl=en	330	2024-07-09 11:44:40	PDF								1	0.08	0	4	12	… Sapodilla fruit regulates the metabolism and keeps the … after infection with fungus and treatment with extracts 17. … them defend against a variety of bacteria and fungi. The plant extracts of …	https://citeseerx.ist.psu.edu/document?repid=rep1&type=pdf&doi=af5152c7a7a2f77eaf3625bd7a24a7fe1bb45fa1	https://scholar.google.com/scholar?q=related:x3SonZYUdKUJ:scholar.google.com/&scioq=sapodila+bacterial+infection&hl=en&as_sdt=2007
331	0	M Harsath, K Ayyappan	Sanitary Towels, Their Menace, and the Ministration of Herbalism: An Overview of the Feminine Pad Patron Mad Mady	2023		researchgate.net	https://www.researchgate.net/profile/Kavin-M-C/publication/373119760_Sanitary_Towels_Their_Menace_and_the_Ministration_of_Herbalism_An_Overview_of_the_Feminine_Pad_Patron_Mad_Mady/links/64df2d1f14f8d173380882e3/Sanitary-Towels-Their-Menace-and-the-Ministration-of-Herbalism-An-Overview-of-the-Feminine-Pad-Patron-Mad-Mady.pdf		331	2024-07-09 11:44:40	PDF								0	0	0	2	1	… "Bamboo Kun" that inhibits bacteria growth and is antibacterial … , infection risk reduction, and increased circulation. Some types have a top layer made of plant components like sapodilla, …	https://www.researchgate.net/profile/Kavin-M-C/publication/373119760_Sanitary_Towels_Their_Menace_and_the_Ministration_of_Herbalism_An_Overview_of_the_Feminine_Pad_Patron_Mad_Mady/links/64df2d1f14f8d173380882e3/Sanitary-Towels-Their-Menace-and-the-Ministration-of-Herbalism-An-Overview-of-the-Feminine-Pad-Patron-Mad-Mady.pdf	https://scholar.google.com/scholar?q=related:v2L0lh397-QJ:scholar.google.com/&scioq=sapodila+bacterial+infection&hl=en&as_sdt=2007
332	67	SA Chaudhary, AF Shahiwala	Medicated chewing gum–a potential drug delivery system	2010	Expert opinion on drug delivery	Taylor &Francis	https://www.tandfonline.com/doi/abs/10.1517/17425247.2010.493554	https://scholar.google.com/scholar?cites=6548660062424134742&as_sdt=2005&sciodt=2007&hl=en	332	2024-07-09 11:44:40		10.1517/17425247.2010.493554							67	4.79	34	2	14	… In the conventional method, first slashes are cut into the bark of the sapodilla tree to collect … toothache, periodontal disease, bacterial and fungal infections, aphthous and dental stomatitis…	https://www.researchgate.net/profile/Shivang-Chaudhary/publication/44685425_Medicated_chewing_gum_-_a_potential_drug_delivery_system/links/0fcfd50c48806ccc67000000/Medicated-chewing-gum-a-potential-drug-delivery-system.pdf	https://scholar.google.com/scholar?q=related:VvSTZ6GD4VoJ:scholar.google.com/&scioq=sapodila+bacterial+infection&hl=en&as_sdt=2007
333	16	AKEA Ghosh	Studies on fungal diseases of some tropical fruits. II. Post infection changes in the sugar contents of some fruits.	1964		cabidigitallibrary.org	https://www.cabidigitallibrary.org/doi/full/10.5555/19640307597	https://scholar.google.com/scholar?cites=9274652601604765002&as_sdt=2005&sciodt=2007&hl=en	333	2024-07-09 11:44:40		10.5555/19640307597							16	0.27	16	1	60	… Fruits of guava, papaw, sapodilla and banana were inoculated with various pathogenic fungi and the changes were followed in the contents of sucrose, glucose and fructose. In the …		https://scholar.google.com/scholar?q=related:SvXN5WYvtoAJ:scholar.google.com/&scioq=sapodila+bacterial+infection&hl=en&as_sdt=2007
334	30	VC Pence	In vitro collecting techniques for germplasm conservation	2002		books.google.com	https://books.google.com/books?hl=en&lr=&id=v1nntFihC9oC&oi=fnd&pg=PA8&dq=sapodila+bacterial+infection&ots=SM-sJc1bFK&sig=rVWEmNOMRAK7DNSn1k5ySjYcGH0	https://scholar.google.com/scholar?cites=749656953920021254&as_sdt=2005&sciodt=2007&hl=en	334	2024-07-09 11:44:40	BOOK								30	1.36	30	1	22	… A medium may also contain antimicrobial additives to retard the growth and destructive effects of bacteria and fungi. The potential side effects on the explant, however, must also be …	https://books.google.com/books?hl=en&lr=&id=v1nntFihC9oC&oi=fnd&pg=PA8&dq=sapodila+bacterial+infection&ots=SM-sJc1bFK&sig=rVWEmNOMRAK7DNSn1k5ySjYcGH0	https://scholar.google.com/scholar?q=related:BuPNGQdRZwoJ:scholar.google.com/&scioq=sapodila+bacterial+infection&hl=en&as_sdt=2007
335	46	WJ Broughton, HC Wong	Storage conditions and ripening of chiku fruits Achras sapota L.	1979	Scientia Horticulturae	Elsevier	https://www.sciencedirect.com/science/article/pii/0304423879900980	https://scholar.google.com/scholar?cites=13463165138328747030&as_sdt=2005&sciodt=2007&hl=en	335	2024-07-09 11:44:40									46	1.02	23	2	45	… The chiku (Achras sapota L.) belongs to the Sapodilla family. It is indigenous to South … Vaseline was applied to the cut end of the fruits to prevent dehydration and fungal infection. They …		https://scholar.google.com/scholar?q=related:FvyBxlzF1roJ:scholar.google.com/&scioq=sapodila+bacterial+infection&hl=en&as_sdt=2007
336	102	J Jacobsen, LL Christrup, NH Jensen	Medicated chewing gum: Pros and Cons	2004	American journal of drug delivery	Springer	https://link.springer.com/article/10.2165/00137696-200402020-00001	https://scholar.google.com/scholar?cites=4794301524202312773&as_sdt=2005&sciodt=2007&hl=en	336	2024-07-09 11:44:40		10.2165/00137696-200402020-00001							102	5.1	34	3	20	… resin named chicle from the sapodilla tree. Greeks have … bacterial infection.[53,54] Later, Wertalik and Bonorden[55] showed that use of the chewing gum reduced the average bacterial …	https://www.academia.edu/download/51600624/00137696-200402020-0000120170202-17294-pwwlql.pdf	https://scholar.google.com/scholar?q=related:RVQxwNXHiEIJ:scholar.google.com/&scioq=sapodila+bacterial+infection&hl=en&as_sdt=2007
337	0	S Summiya	Nanotechnology in the agricultural sector	2024	Sustainable Agricultural Practices	Elsevier	https://www.sciencedirect.com/science/article/pii/B978044319150300014X		337	2024-07-09 11:44:40									0	0	0	1	1	… and preservation packaging also maintain the shelf life of food crops and vegetables by efficient use of nanoparticles which is economically favorable and prevents bacterial fungal …		https://scholar.google.com/scholar?q=related:lnp8Kvv-N9QJ:scholar.google.com/&scioq=sapodila+bacterial+infection&hl=en&as_sdt=2007
338	0	SE Anwani, MB Etsuyankpa, SPI Ogah, PK Mensah	Phytochemistry and antibacterial activity of the methanol, petroleum ether and aqueous extracts of the leaves, stem bark and roots of bobgunnia fistuloides		researchgate.net		https://www.researchgate.net/profile/Samuel-Anwani/publication/358158253_Phytochemistry_and_antibacterial_activity_of_the_methanol_petroleum_ether_and_aqueous_extracts_of_the_leaves_stem_bark_and_roots_of_bobgunnia_fistuloides/links/660ad6f7390c214cfd2f3979/Phytochemistry-and-antibacterial-activity-of-the-methanol-petroleum-ether-and-aqueous-extracts-of-the-leaves-stem-bark-and-roots-of-bobgunnia…		338	2024-07-09 11:44:40	PDF								0	0	0	4		… alata are used to treat skin infections caused by fungi while S. hirsuta are used medicinally … of bacteria investigated in this study attributed to the reasons why gram negative bacteria (…	https://www.researchgate.net/profile/Samuel-Anwani/publication/358158253_Phytochemistry_and_antibacterial_activity_of_the_methanol_petroleum_ether_and_aqueous_extracts_of_the_leaves_stem_bark_and_roots_of_bobgunnia_fistuloides/links/660ad6f7390c214cfd2f3979/Phytochemistry-and-antibacterial-activity-of-the-methanol-petroleum-ether-and-aqueous-extracts-of-the-leaves-stem-bark-and-roots-of-bobgunnia…	https://scholar.google.com/scholar?q=related:N0pBrtJb1joJ:scholar.google.com/&scioq=sapodila+bacterial+infection&hl=en&as_sdt=2007
339	0	A Basu	Study of Nutraceuticals in Cancer Treatment: An In Silico Approach	2020	Nutraceuticals and Dietary Supplements	taylorfrancis.com	https://www.taylorfrancis.com/chapters/edit/10.1201/9780367821517-8/study-nutraceuticals-cancer-treatment-silico-approach-anamika-basu		339	2024-07-09 11:44:40		10.1201/9780367821517-8							0	0	0	1	4	… A majority of these disorders are generated by carcinogens, radiation, and infectious agents (viruses/bacteria). In cancer, six hallmark changes occur in cell physiology, which are …		https://scholar.google.com/scholar?q=related:R0FsjCYDHLcJ:scholar.google.com/&scioq=sapodila+bacterial+infection&hl=en&as_sdt=2007
340	0	AM Situngkir, R Rida, RE Witri, ...	PHARMACOLOGICAL ACTIVITIES OF KENCUR PLANT (KAEMPFERIA GALANGA L.) AS AN ASMA AND ANTI BACTERIAL MEDICINE	2022	EXTRA …	journals.insparagonsociety.org	https://journals.insparagonsociety.org/index.php/extrateritorial/article/view/55		340	2024-07-09 11:44:40									0	0	0	4	2	Kaempferia galanga is one of the Indonesian plants that has medicinal properties. Herbs that have medicinal properties are considered safer, more effective, and have smaller side …	https://journals.insparagonsociety.org/index.php/extrateritorial/article/download/55/57	https://scholar.google.com/scholar?q=related:_IuCCqZvJ6UJ:scholar.google.com/&scioq=sapodila+bacterial+infection&hl=en&as_sdt=2007
341	0	SN Pramod	Studies on the modulatory aspects of certain Dietary Lectins in relation to Hypersensitivity and Immunogenecity	2007		ir.cftri.res.in	http://ir.cftri.res.in/9009/1/S_N_Pramod_PhD_Thesis.pdf		341	2024-07-09 11:44:40	PDF								0	0	0	1	17	… The immunosuppression can be generated by severe bacterial and viral infections, cancer, environmental agents such as pesticides or allergens, malnutrition, psychic stress, or …	http://ir.cftri.res.in/9009/1/S_N_Pramod_PhD_Thesis.pdf	https://scholar.google.com/scholar?q=related:WdQXKvWKkuoJ:scholar.google.com/&scioq=sapodila+bacterial+infection&hl=en&as_sdt=2007
342	1	M Baskar, G Hemalatha	Optimization of enzymatic clarification of sapota (Achras sapota L.) juice using response surface methodology	2021	Journal of Environmental Biology	tnau.ac.in	https://tnau.ac.in/site/pgschooltnau/wp-content/uploads/sites/73/2021/10/e-Print_AGSC-2020_JEB-compressed.pdf#page=92	https://scholar.google.com/scholar?cites=17731565870939506971&as_sdt=2005&sciodt=2007&hl=en	342	2024-07-09 11:44:40	PDF								1	0.33	1	2	3	… Sapota strengthens the intestines, boosts immunity and prevents from bacterial infections as it … Rahman: Optimization of enzymatic clarification of sapodilla juice using response surface …	https://tnau.ac.in/site/pgschooltnau/wp-content/uploads/sites/73/2021/10/e-Print_AGSC-2020_JEB-compressed.pdf#page=92	https://scholar.google.com/scholar?q=related:GwnKuDYtE_YJ:scholar.google.com/&scioq=sapodila+bacterial+infection&hl=en&as_sdt=2007
343	0	WIT Fruit	13 Incredible Health Benefits Of Tamarillo (Tree Tomato)		highratedgabru.com		https://www.highratedgabru.com/health-benefits-of-tamarillo/		343	2024-07-09 11:44:40									0	0	0	1		… It also helps to keep you away from colds and infections. However, it is vital to consume this … reduce the size of swelling in the tonsils by destroying the bacteria that cause the infection. …		https://scholar.google.com/scholar?q=related:a9uKLt3kIxUJ:scholar.google.com/&scioq=sapodila+bacterial+infection&hl=en&as_sdt=2007
344	6	TY Thung, E Lee, GY Wai, CF Pui, CH Kuan, ...	A review of culture-dependent and molecular methods for detection of Salmonella in food safety	2019	Food …	research.monash.edu	https://research.monash.edu/en/publications/a-review-of-culture-dependent-and-molecular-methods-for-detection	https://scholar.google.com/scholar?cites=9215824717172502883&as_sdt=2005&sciodt=2007&hl=en	344	2024-07-09 11:44:40									6	1.2	1	6	5	… infectious disease caused by bacterial pathogens is a major health problem worldwide. Among the foodborne pathogens, Salmonella is the most common bacteria … either from infected …	https://research.monash.edu/files/300110201/300110026_oa.pdf	https://scholar.google.com/scholar?q=related:Y_FUs8Av5X8J:scholar.google.com/&scioq=sapodila+bacterial+infection&hl=en&as_sdt=2007
345	4	S Tshoko	Spectroelectrochemical graphene-silver/zinc oxide nanoparticulate phenotype biosensors for ethambutol and pyrazinamide	2019		etd.uwc.ac.za	https://etd.uwc.ac.za/handle/11394/6842	https://scholar.google.com/scholar?cites=17767675046975972451&as_sdt=2005&sciodt=2007&hl=en	345	2024-07-09 11:44:40									4	0.8	4	1	5	… bacteria are dividing. In the first phase of TB treatment (the intensive phase), the drugs kills mainly the fast growing bacteria … and infection rate which occurs in patients infected with TB …	https://etd.uwc.ac.za/bitstream/handle/11394/6842/tshoko_msc_nsc_2019.pdf?sequence=1&isAllowed=n	https://scholar.google.com/scholar?q=related:YySTa1F2k_YJ:scholar.google.com/&scioq=sapodila+bacterial+infection&hl=en&as_sdt=2007
346	0	PS Variyar, S Gautam, ...	Brassica Vegetables	2015	Handbook of Vegetable …	api.taylorfrancis.com	https://api.taylorfrancis.com/content/chapters/edit/download?identifierName=doi&identifierValue=10.1201/b19252-23&type=chapterpdf		346	2024-07-09 11:44:40									0	0	0	3	9	… major bacterial diseases that affect Brassica vegetables are the black rot disease and bacterial soft … burn or hail injury in the field is the major path of infection in case of bacterial soft rot. …		https://scholar.google.com/scholar?q=related:jOFxHdhiOn0J:scholar.google.com/&scioq=sapodila+bacterial+infection&hl=en&as_sdt=2007
347	3	HP Jaishankar, L Kukanoor	Effect of post harvest treatments on physiological changes of sapota cv. Kalipatti at ambient storage	2016	Advances in Life Sciences	indianjournals.com	https://www.indianjournals.com/ijor.aspx?target=ijor:als&volume=5&issue=7&article=078	https://scholar.google.com/scholar?cites=4912762564326236598&as_sdt=2005&sciodt=2007&hl=en	347	2024-07-09 11:44:40									3	0.38	2	2	8	… the rate of transpiration, respiration and microbial infection. This can be achieved by proper … It is also called by other names such as chikku, sapota plum, sapodilla or prickly pear. …	https://www.researchgate.net/profile/Parthsarthi-Pandya/publication/304489627_Standardization_of_Process_Parameters_for_Preparation_of_Peanut_Milk/links/595728ab458515ea4c5d1084/Standardization-of-Process-Parameters-for-Preparation-of-Peanut-Milk.pdf#page=468	https://scholar.google.com/scholar?q=related:tqGA-IWjLUQJ:scholar.google.com/&scioq=sapodila+bacterial+infection&hl=en&as_sdt=2007
348	0	HAM Dewi, N Nasrullah, ...	Comparison of Plant Health Aspect In Green Open Spaces of Alun-Alun Kebumen and Alun-Alun Karanganyar, Kebumen, Central Java	2024	International Journal of …	journal.yaspim.org	https://www.journal.yaspim.org/index.php/IJIERM/article/view/287		348	2024-07-09 11:44:40									0	0	0	3	1	… , and bacteria which can be divided into infectious and non-… (Wodyetia bifurcata), small sapodilla (Manilkara kauki), and … (Syzygium campanulatum), sapodilla (Manilkara kauki), and …	https://www.journal.yaspim.org/index.php/IJIERM/article/download/287/222	https://scholar.google.com/scholar?q=related:lhHSPcm5ve0J:scholar.google.com/&scioq=sapodila+bacterial+infection&hl=en&as_sdt=2007
349	0	D Nagajothi, J Maheswari	International Journal of Tamil Language and Literary Studies		researchgate.net		https://www.researchgate.net/profile/Nagajothi-Dharmalingam/publication/354202682_Medicinal_Values_and_Chemical_Substances_in_the_Traditional_Medicine_of_India/links/612ba7ee0360302a00659f0a/Medicinal-Values-and-Chemical-Substances-in-the-Traditional-Medicine-of-India.pdf		349	2024-07-09 11:44:40	PDF								0	0	0	2		… and intestinal infections by parasites. It has rich carotene and helps for eye sight infections. ‗… The fruit is used as an anti diabetic, anti bacterial, anti fungal and anti microbial one. It is …	https://www.researchgate.net/profile/Nagajothi-Dharmalingam/publication/354202682_Medicinal_Values_and_Chemical_Substances_in_the_Traditional_Medicine_of_India/links/612ba7ee0360302a00659f0a/Medicinal-Values-and-Chemical-Substances-in-the-Traditional-Medicine-of-India.pdf	https://scholar.google.com/scholar?q=related:ft7AmfUghl8J:scholar.google.com/&scioq=sapodila+bacterial+infection&hl=en&as_sdt=2007
350	23	Y Patel, A Shukla, V Saini, N Shrimal, ...	Chewing gum as a drug delivery system	2011	International Journal of …	Citeseer	https://citeseerx.ist.psu.edu/document?repid=rep1&type=pdf&doi=1ee3d0ba559fe9861f65851648d1fa27319cb6a4	https://scholar.google.com/scholar?cites=14602404827729918298&as_sdt=2005&sciodt=2007&hl=en	350	2024-07-09 11:44:40	PDF								23	1.77	5	5	13	… One thousand years ago, the Mayan Indians chewed tree resin (chicle) from the sapodilla tree in … Oral infections caused by bacteria or fungi are often seen, especially in patients with …	https://citeseerx.ist.psu.edu/document?repid=rep1&type=pdf&doi=1ee3d0ba559fe9861f65851648d1fa27319cb6a4	https://scholar.google.com/scholar?q=related:WnlK79IppsoJ:scholar.google.com/&scioq=sapodila+bacterial+infection&hl=en&as_sdt=2007
351	7	J Liu, D Han, Y Shi	Gene Cloning, Expression, and Antifungal Activities of Permatin from Naked Oat (Avena nuda)	2019	Probiotics and antimicrobial proteins	Springer	https://link.springer.com/article/10.1007/s12602-018-9422-y	https://scholar.google.com/scholar?cites=2771210587259048129&as_sdt=2005&sciodt=2007&hl=en	351	2024-07-09 11:44:40		10.1007/s12602-018-9422-y							7	1.4	2	3	5	… Pathogenesis-related proteins (PR proteins) involved in host defense are the products accumulated by plants when infected by phytopathogenic bacteria, fungi, or viruses. PR proteins …	https://www.researchgate.net/profile/Jian-Liu-146/publication/324891922_Gene_Cloning_Expression_and_Antifungal_Activities_of_Permatin_from_Naked_Oat_Avena_nuda/links/5e8d39ec92851c2f52886c4b/Gene-Cloning-Expression-and-Antifungal-Activities-of-Permatin-from-Naked-Oat-Avena-nuda.pdf	https://scholar.google.com/scholar?q=related:wZBgu1hRdSYJ:scholar.google.com/&scioq=sapodila+bacterial+infection&hl=en&as_sdt=2007
352	18	TK Kirk	Tropical Trees of Florida and the Virgin Islands: A guide to identification, characteristics and uses	2009		books.google.com	https://books.google.com/books?hl=en&lr=&id=wtwvRIuYABYC&oi=fnd&pg=PA5&dq=sapodila+bacterial+infection&ots=xnAnZAtvCI&sig=UAM_PgZZDsg1WzMyrIHNQHvUMlg	https://scholar.google.com/scholar?cites=6184406433819235622&as_sdt=2005&sciodt=2007&hl=en	352	2024-07-09 11:44:40	BOOK								18	1.2	18	1	15	Covering over 90 species and with over 500 color photographs, this book has been long awaited by both tree professionals and anyone who wants to identify a tree in the Virgin Islands …		https://scholar.google.com/scholar?q=related:JpVvmuJs01UJ:scholar.google.com/&scioq=sapodila+bacterial+infection&hl=en&as_sdt=2007
353	7	M Marwaha, M Bhat	Antimicrobial Effectiveness of Chlorhexidine Chewing Gums on Streptococcus Mutans Counts– An in vivo Microbiological Study	2010	Journal of Clinical Pediatric Dentistry	meridian.allenpress.com	https://meridian.allenpress.com/jcpd/article-abstract/35/1/31/78574	https://scholar.google.com/scholar?cites=406212512716706105&as_sdt=2005&sciodt=2007&hl=en	353	2024-07-09 11:44:40									7	0.5	4	2	14	… Mayan Indians in Central America, who chewed a resin named Chicle from sapodilla tree. … manifest themselves vary between bacterial species. The bacterial cell is characteristically …	https://oss.jocpd.com/files/article/20220727-831/pdf/JOCPD35.1.31.pdf	https://scholar.google.com/scholar?q=related:OVHMyyAoowUJ:scholar.google.com/&scioq=sapodila+bacterial+infection&hl=en&as_sdt=2007
354	1	P Mahasawat, S Boukaew, P Prasertsan	Exploring the potential of Crotalaria juncea flower extracts as a source of antioxidants, antimicrobials, and cytoprotective agents for biomedical applications	2023	BioTechnologia	ncbi.nlm.nih.gov	https://www.ncbi.nlm.nih.gov/pmc/articles/PMC10777724/	https://scholar.google.com/scholar?cites=8855450028335774685&as_sdt=2005&sciodt=2007&hl=en	354	2024-07-09 11:44:40	HTML								1	1	0	3	1	… effect against Gram-positive bacteria than Gram-negative bacteria. This variance in … the different bacterial types. Specifically, the thicker peptidoglycan layer in Gram-positive bacteria’s …	https://www.ncbi.nlm.nih.gov/pmc/articles/PMC10777724/	https://scholar.google.com/scholar?q=related:3Tst8eHg5HoJ:scholar.google.com/&scioq=sapodila+bacterial+infection&hl=en&as_sdt=2007
355	147	C Gowe	Review on potential use of fruit and vegetables by-products as a valuable source of natural food additives	2015	Food Sci. Qual. Manag	researchgate.net	https://www.researchgate.net/profile/Chala-Kuyu/publication/285592477_Review_on_Potential_Use_of_Fruit_and_Vegetables_By-Products_as_A_Valuable_Source_of_Natural_Food_Additives/links/5661505508aebae678aa7700/Review-on-Potential-Use-of-Fruit-and-Vegetables-By-Products-as-A-Valuable-Source-of-Natural-Food-Additives.pdf	https://scholar.google.com/scholar?cites=6692953206814092983&as_sdt=2005&sciodt=2007&hl=en	355	2024-07-09 11:44:40	PDF								147	16.33	147	1	9	… Because of increasing threat of infectious diseases, the need of the hour is to find natural … mode of action involves several targets in the bacterial cell. The hydrophobicity of EOs enables …	https://www.researchgate.net/profile/Chala-Kuyu/publication/285592477_Review_on_Potential_Use_of_Fruit_and_Vegetables_By-Products_as_A_Valuable_Source_of_Natural_Food_Additives/links/5661505508aebae678aa7700/Review-on-Potential-Use-of-Fruit-and-Vegetables-By-Products-as-A-Valuable-Source-of-Natural-Food-Additives.pdf	https://scholar.google.com/scholar?q=related:ty53Fnsl4lwJ:scholar.google.com/&scioq=sapodila+bacterial+infection&hl=en&as_sdt=2007
356	2	CE Adams	WOMEN AND FOLK REMEDIES: YOUTH, FERTILITY, AND HEALTH.	2018	Journal of Behavioral &Social Sciences	search.ebscohost.com	https://search.ebscohost.com/login.aspx?direct=true&profile=ehost&scope=site&authtype=crawler&jrnl=23758899&AN=135097814&h=dubkU0zBUQCR74W62LGxBHRWC0xWC5uihzHvV6Pdo%2BSy17CkzIAFOTzAws3OYLSY0stJ15eip0IJ1PLAlq%2FroQ%3D%3D&crl=c	https://scholar.google.com/scholar?cites=18115572968398152107&as_sdt=2005&sciodt=2007&hl=en	356	2024-07-09 11:44:40									2	0.33	2	1	6	How prevalent is the use of ethnoremedies in the world? Are women the main primary users? If so, why? This article is a literature review on the increasing worldwide use and benefits …		https://scholar.google.com/scholar?q=related:q2EKZKJxZ_sJ:scholar.google.com/&scioq=sapodila+bacterial+infection&hl=en&as_sdt=2007
357	0	TR Roper, AR Krueger	Contributed Papers (Poster and Oral) Workshops Colloquia	1997	HortScience	researchgate.net	https://www.researchgate.net/profile/Joseph-Arul-2/publication/277862186_Effect_of_Chitosan_on_Tissue_Maceration_and_Enzyme_Production_by_Erwinia_carotovora_in_Potato/links/5592705208ae15962d8e6b41/Effect-of-Chitosan-on-Tissue-Maceration-and-Enzyme-Production-by-Erwinia-carotovora-in-Potato.pdf		357	2024-07-09 11:44:40	PDF								0	0	0	2	27	… Many horticultural crops are infected with bacterial, fungal, or … on the seedling growth of sapodilla (Achras sapota) and … length and total height of sapodilla and tamarind seedlings. …	https://www.researchgate.net/profile/Joseph-Arul-2/publication/277862186_Effect_of_Chitosan_on_Tissue_Maceration_and_Enzyme_Production_by_Erwinia_carotovora_in_Potato/links/5592705208ae15962d8e6b41/Effect-of-Chitosan-on-Tissue-Maceration-and-Enzyme-Production-by-Erwinia-carotovora-in-Potato.pdf	https://scholar.google.com/scholar?q=related:Wct3GspaMxwJ:scholar.google.com/&scioq=sapodila+bacterial+infection&hl=en&as_sdt=2007
358	4	S Wessel	Oral health benefits of chewing gum	2016		research.rug.nl	https://research.rug.nl/en/publications/oral-health-benefits-of-chewing-gum	https://scholar.google.com/scholar?cites=5415117032469446074&as_sdt=2005&sciodt=2007&hl=en	358	2024-07-09 11:44:40									4	0.5	4	1	8	… bacteria and remove them from the oral cavity. To test this hypothesis, we developed two methods to quantify numbers of bacteria … rubbery tree sap of the Sapodilla tree formed the basis …	https://research.rug.nl/files/28859116/Chapter_2.pdf	https://scholar.google.com/scholar?q=related:uj2CIUBcJksJ:scholar.google.com/&scioq=sapodila+bacterial+infection&hl=en&as_sdt=2007
359	6	RM Wilder, TE Keys	HANDBOOK OF NUTRITION: XIV: UNUSUAL FOODS OF HIGH NUTRITIVE VALUE	1942	Journal of the American Medical …	jamanetwork.com	https://jamanetwork.com/journals/jama/article-abstract/257981	https://scholar.google.com/scholar?cites=16326199868892244938&as_sdt=2005&sciodt=2007&hl=en	359	2024-07-09 11:44:40									6	0.07	3	2	82	… infection of the upper respiratory tract with no signs of an exacerbation of the encephlaitis. Evidence that mycotic infections … fatal experimental infections with Bacterium necrophorum, a …		https://scholar.google.com/scholar?q=related:yutZ5UdQkuIJ:scholar.google.com/&scioq=sapodila+bacterial+infection&hl=en&as_sdt=2007
360	4	TD Syamsul, R Natzir, S As'ad, V Hadju, ...	The Chemical Composition of Trigona Honey in Bone, South Sulawesi	2020	Indian Journal of …	academia.edu	https://www.academia.edu/download/87686806/10280.pdf	https://scholar.google.com/scholar?cites=13680971204350607492&as_sdt=2005&sciodt=2007&hl=en	360	2024-07-09 11:44:40	PDF								4	1	1	5	4	… Several herbal products can be used as therapy for infectious and non- infectious diseases, … Antibacterial activities of Sapodilla fruit extract inhibiting Salmonella typhi in mice Balb/c. …	https://www.academia.edu/download/87686806/10280.pdf	https://scholar.google.com/scholar?q=related:hICqUdOS3L0J:scholar.google.com/&scioq=sapodila+bacterial+infection&hl=en&as_sdt=2007
361	123	P Sharma, M Sharma, M Raja, V Shanmugam	Status of Trichoderma research in India: A review	2014	Indian Phytopathol	academia.edu	https://www.academia.edu/download/93363843/17829.pdf	https://scholar.google.com/scholar?cites=15244415836709670401&as_sdt=2005&sciodt=2007&hl=en	361	2024-07-09 11:44:40	PDF								123	12.3	31	4	10	… Sapodilla (Manilkara zapota) is one of the edible fruits cultivated all over India. Antagonistic … virens were tested against fruit rots pathogens of sapodilla (Manilkara zapota L.) under …	https://www.academia.edu/download/93363843/17829.pdf	https://scholar.google.com/scholar?q=related:AU5rY28Lj9MJ:scholar.google.com/&scioq=sapodila+bacterial+infection&hl=en&as_sdt=2007
362	5	AA Talesh, S Amiri, M Radi, M Hosseinifarahi	Effect of nanocomposite alginate-based edible coatings containing thymol-nanoemulsion and/or thymol-loaded nanostructured lipid carriers on the microbial and …	2024	International Journal of …	Elsevier	https://www.sciencedirect.com/science/article/pii/S0141813023060956	https://scholar.google.com/scholar?cites=18132335346868028056&as_sdt=2005&sciodt=2007&hl=en	362	2024-07-09 11:44:40									5	5	1	4	1	… of carrot, along with the carrot quick bacterial spoilage, which makes its marketing life short … Carrots, with no physical injury or sign of infection, and in the same stage of ripeness were …		https://scholar.google.com/scholar?q=related:mAJUwu3-ovsJ:scholar.google.com/&scioq=sapodila+bacterial+infection&hl=en&as_sdt=2007
363	0	E Sreenivasan	OCCURRENCE OF MISTLETOE (LORANTHUS SPP.) INFESTATION ON GARDEN CROTON (CODIAEUM VARIEGATUM) AND OTHER HOST TREES		ijeast.com		http://ijeast.com/papers/49-54,Tesma410,IJEAST.pdf		363	2024-07-09 11:44:40	PDF								0	0	0	1		… The intensity and the total number of trees infected by the parasitic weed were determined. … , Kannur in order to assess the severity of infection and host range of the parasite in the …	http://ijeast.com/papers/49-54,Tesma410,IJEAST.pdf	https://scholar.google.com/scholar?q=related:gXSn8uKrxwwJ:scholar.google.com/&scioq=sapodila+bacterial+infection&hl=en&as_sdt=2007
364	4	VP Santhi, N Nireshkumar, C Vasugi, S Parthiban, ...	Role of rootstocks to mitigate biotic and abiotic stresses in tropical and subtropical fruit crops: A	2020	IJCS	researchgate.net	https://www.researchgate.net/profile/Nireshkumar-N/publication/344869667_Role_of_rootstocks_to_mitigate_biotic_and_abiotic_stresses_in_tropical_and_subtropical_fruit_crops_A_review/links/60cb72b1a6fdcc01d47db510/Role-of-rootstocks-to-mitigate-biotic-and-abiotic-stresses-in-tropical-and-subtropical-fruit-crops-A-review.pdf	https://scholar.google.com/scholar?cites=5212775989489053008&as_sdt=2005&sciodt=2007&hl=en	364	2024-07-09 11:44:40	PDF								4	1	1	5	4	… The primary source of infection is through infected potting … enzymatic activity responses of sapodilla rootstock to salinity … enzymatic activity responses of sapodilla rootstock to salinity …	https://www.researchgate.net/profile/Nireshkumar-N/publication/344869667_Role_of_rootstocks_to_mitigate_biotic_and_abiotic_stresses_in_tropical_and_subtropical_fruit_crops_A_review/links/60cb72b1a6fdcc01d47db510/Role-of-rootstocks-to-mitigate-biotic-and-abiotic-stresses-in-tropical-and-subtropical-fruit-crops-A-review.pdf	https://scholar.google.com/scholar?q=related:UC0u2ySAV0gJ:scholar.google.com/&scioq=sapodila+bacterial+infection&hl=en&as_sdt=2007
365	423	AK Thompson	Fruit and vegetables: harvesting, handling and storage	2008		books.google.com	https://books.google.com/books?hl=en&lr=&id=5tijQBNi-xoC&oi=fnd&pg=PR5&dq=sapodila+bacterial+infection&ots=SylKbmmBK9&sig=XtR8wjMzpPrarLBc5jsFvivjs7A	https://scholar.google.com/scholar?cites=15438576649760264221&as_sdt=2005&sciodt=2007&hl=en	365	2024-07-09 11:44:40	BOOK								423	26.44	423	1	16	… Gypsum, applied to sapodilla … infection in onions occurs during production but will only develop on the bulbs during storage where the conditions are conducive. Infection with bacteria …	https://www.pumpkinshow.com/archive/2023/pdf/2023_winners-fruits.pdf	https://scholar.google.com/scholar?q=related:HdCZdqrXQNYJ:scholar.google.com/&scioq=sapodila+bacterial+infection&hl=en&as_sdt=2007
366	10	MR Khan, K Poornima, VS Somvanshi, ...	Meloidogyne enterolobii: a threat to guava (Psidium guajava) cultivation	2022	… of Phytopathology and …	Taylor &Francis	https://www.tandfonline.com/doi/abs/10.1080/03235408.2022.2132623	https://scholar.google.com/scholar?cites=13592387241971993853&as_sdt=2005&sciodt=2007&hl=en	366	2024-07-09 11:44:40		10.1080/03235408.2022.2132623							10	5	3	4	2	… Isozyme analysis of the young egg-laying females from the infected guava roots in India … in two cases, efforts were made to isolate rhizobacterial bacterial strains and studied further. …	https://www.researchgate.net/profile/Matiyar-Rahaman-Khan/publication/364649228_Meloidogyne_enterolobii_a_threat_to_guava_Psidium_guajava_cultivation/links/6367d3ac54eb5f547cac0f27/Meloidogyne-enterolobii-a-threat-to-guava-Psidium-guajava-cultivation.pdf	https://scholar.google.com/scholar?q=related:_cxKVy7cobwJ:scholar.google.com/&scioq=sapodila+bacterial+infection&hl=en&as_sdt=2007
367	0	ML McCluskey	Revised Edition.	1997		ERIC	https://eric.ed.gov/?id=ED451980		367	2024-07-09 11:44:40	Indian Education Curriculum Guide.								0	0	0	1	27	… ChileRubbery sap from the sapodilla tree chewed by Mexican Indians; in 1880s mixed with … They also discovered ways to keep bacteria from causing infection when performing surgery…	https://files.eric.ed.gov/fulltext/ED451980.pdf	https://scholar.google.com/scholar?q=related:BjWgzbGvBGcJ:scholar.google.com/&scioq=sapodila+bacterial+infection&hl=en&as_sdt=2007
368	0	V Shah, V Patel, J Shah, ...	CHEWING GUM: A BOON FOR ORAL DRUG DELIVERY	2017	Nirma University Journal …	journals.nirmauni.ac.in	https://journals.nirmauni.ac.in/index.php/pharmacy/article/view/6		368	2024-07-09 11:44:40									0	0	0	4	7	… The Mayan Indians obtained gum from the sapodilla tree, a … maintain a sufficient antibacterial dose within the oral cavity. … MCG aids in curing fungal infection by continuously releasing …	https://journals.nirmauni.ac.in/index.php/pharmacy/article/download/6/5	https://scholar.google.com/scholar?q=related:2Kg0SOgDJNYJ:scholar.google.com/&scioq=sapodila+bacterial+infection&hl=en&as_sdt=2007
369	0	B Kahan, JM Fagan	Easy and Affordable Solutions to Preventing Oral Diseases	2014		rucore.libraries.rutgers.edu	https://rucore.libraries.rutgers.edu/rutgers-lib/48141/PDF/1/		369	2024-07-09 11:44:40	PDF								0	0	0	2	10	… A dental caries is a bacterial infection that demineralizes the enamel, dentin, and cementum … The Mayans enjoyed chewing on tsictle, the sap of the sapodilla tree. Native Americans …	https://rucore.libraries.rutgers.edu/rutgers-lib/48141/PDF/1/	https://scholar.google.com/scholar?q=related:mcreYoE5HI8J:scholar.google.com/&scioq=sapodila+bacterial+infection&hl=en&as_sdt=2007
370	11	RC Ploetz	Tropical fruit crops and the diseases that affect their production	2009	… Biology and Conservation Management-Volume III …	books.google.com	https://books.google.com/books?hl=en&lr=&id=OyPXCwAAQBAJ&oi=fnd&pg=PA71&dq=sapodila+bacterial+infection&ots=EBDvnZbvnv&sig=MBx4G6Mrn8ffIO9nfiJOTkyIugs	https://scholar.google.com/scholar?cites=4905260629926334792&as_sdt=2005&sciodt=2007&hl=en	370	2024-07-09 11:44:40									11	0.73	11	1	15	… infection. New leaf flushes are most susceptible. Although fruits can be infected at any stage of development, infections … most important bacterial disease of passionfruit, bacterial spot. …	https://citeseerx.ist.psu.edu/document?repid=rep1&type=pdf&doi=00d58af808bd8cdb183eca9f9d1f7b13409001ec	https://scholar.google.com/scholar?q=related:SNF3wY38EkQJ:scholar.google.com/&scioq=sapodila+bacterial+infection&hl=en&as_sdt=2007
371	12	MS Khan, QH Lari, MA Khan	Unani concept of nephrolithiasis (hisat-e-kulyah) and its management: An overview	2016	WJPMR	academia.edu	https://www.academia.edu/download/62717692/Nephrolithiasis-WJPMR20200402-12191-12f6vkb.pdf	https://scholar.google.com/scholar?cites=5158732049501895936&as_sdt=2005&sciodt=2007&hl=en	371	2024-07-09 11:44:40	PDF								12	1.5	4	3	8	… [16,17,18] 1% of struvite (magnesium ammonium phosphate produced during infection with bacteria that possess the enzyme urease), The remaining 1% of cystine stone (Hisat-e-…	https://www.academia.edu/download/62717692/Nephrolithiasis-WJPMR20200402-12191-12f6vkb.pdf	https://scholar.google.com/scholar?q=related:AL37hXd_l0cJ:scholar.google.com/&scioq=sapodila+bacterial+infection&hl=en&as_sdt=2007
372	10	S Hamza, S Naseem, E Bashir, GH Rizwani, ...	Trace element geochemistry of Manilkara zapota (L.) P. Royen, fruit from winder, Balochistan, Pakistan in perspective of medical geology	2013	Pakistan Journal of …	Citeseer	https://citeseerx.ist.psu.edu/document?repid=rep1&type=pdf&doi=12eb73dcc509c39c19c499d475063b2c3002426e	https://scholar.google.com/scholar?cites=6727436181011320172&as_sdt=2005&sciodt=2007&hl=en	372	2024-07-09 11:44:40	PDF								10	0.91	2	5	11	An integrated study of rocks, soils and fruits of Manilkara zapota (L.)(Sapotaceae) of Winder area have been carried out to elaborate trace elements relationship between them. The …	https://citeseerx.ist.psu.edu/document?repid=rep1&type=pdf&doi=12eb73dcc509c39c19c499d475063b2c3002426e	https://scholar.google.com/scholar?q=related:bE1KKpCnXF0J:scholar.google.com/&scioq=sapodila+bacterial+infection&hl=en&as_sdt=2007
373	0	J Jamilah	Nutritional Composition of Ruminant Forage Derived from Rice Crops (Oryza Sativa L.) that Applicated by C. odorata Compost	2016		repository.unitas-pdg.ac.id	https://repository.unitas-pdg.ac.id/id/eprint/209/2/unand%20turnitin%202016.pdf		373	2024-07-09 11:44:40	PDF								0	0	0	1	8	… Development of Antimicrobial Analysis of Lactic Acid Bacteria Isolated from VCO (Virgin Coconut Oil) Fermentation Process Against Bacteria in The Secretion of CSOM …	https://repository.unitas-pdg.ac.id/id/eprint/209/2/unand%20turnitin%202016.pdf	https://scholar.google.com/scholar?q=related:tmtYiGisFH8J:scholar.google.com/&scioq=sapodila+bacterial+infection&hl=en&as_sdt=2007
374	0	J González-Fernández, JI Hormaza	PEST AND DISEASES IN MANGO (MANGIFERA INDICA L.)		mango.org		https://www.mango.org/wp-content/uploads/2020/08/Mango_Pests_and_Diseases_ENG.pdf		374	2024-07-09 11:44:40	PDF								0	0	0	2		In this work, we review the most important pests and diseases that affect mango production worldwide as well as the main measures implemented to control them. Pests and diseases …	https://www.mango.org/wp-content/uploads/2020/08/Mango_Pests_and_Diseases_ENG.pdf	https://scholar.google.com/scholar?q=related:jLWdrDgjc4sJ:scholar.google.com/&scioq=sapodila+bacterial+infection&hl=en&as_sdt=2007
375	30	S Rudra, A Tahamina, NU Emon, M Adnan, M Shakil, ...	Evaluation of Various Solvent Extracts of Tetrastigma leucostaphylum (Dennst.) Alston Leaves, a Bangladeshi Traditional Medicine Used for the Treatment of …	2020	Molecules	mdpi.com	https://www.mdpi.com/1420-3049/25/21/4994	https://scholar.google.com/scholar?cites=4534873569002636008&as_sdt=2005&sciodt=2007&hl=en	375	2024-07-09 11:44:40	HTML								30	7.5	5	6	4	… Infectious diseases are responsible for significant morbidity and mortality worldwide [1]. Developing countries are especially prone to the risk of these diseases, including diarrhea, …	https://www.mdpi.com/1420-3049/25/21/4994	https://scholar.google.com/scholar?q=related:6MK19Xsb7z4J:scholar.google.com/&scioq=sapodila+bacterial+infection&hl=en&as_sdt=2007
376	0	J Alano	Production and Evaluation of Jackfruit (Artocarpus Heterophyllus) and Chico Fruit (Manilkara Zapota)(Jaco) Vinegar	2023	Psychology and Education: A Multidisciplinary Journal	scimatic.org	https://scimatic.org/show_manuscript/1975		376	2024-07-09 11:44:40									0	0	0	1	1	… Vinegar is an acidic liquid that is created when ethanol is fermented by acetic acid bacteria. It is … , which also strengthens the colon's membrane and increases its resistance to infections. …	https://scimatic.org/storage/journals/11/pdfs/1975.pdf	https://scholar.google.com/scholar?q=related:bfsK8EWlQV4J:scholar.google.com/&scioq=sapodila+bacterial+infection&hl=en&as_sdt=2007
377	0	AK Singh, A Sharma, A Singh	Use of Tissue Culture for Propagation of Banana Variety Grand Naine (Musa acuminata)	2023	Current Journal of …	eprints.go2submission.com	http://eprints.go2submission.com/id/eprint/2295/		377	2024-07-09 11:44:40									0	0	0	3	1	… bulky suckers; and disease and pest infection. Micropropagation overcomes all these insufficiencies … for 6 minutes was best in overcoming fungal or bacterial growth and it did not cause …	http://eprints.go2submission.com/id/eprint/2295/1/Sharma42432023CJAST105506.pdf	https://scholar.google.com/scholar?q=related:yhAGbsBEYCsJ:scholar.google.com/&scioq=sapodila+bacterial+infection&hl=en&as_sdt=2007
378	15	E Hackl, C Hölzl, C Konlechner, ...	Food of plant origin: production methods and microbiological hazards linked to food‐borne disease. Reference: CFT/EFSA/BIOHAZ/2012/01 Lot 1 (Food of plant origin …	2013	EFSA Supporting …	Wiley Online Library	https://efsa.onlinelibrary.wiley.com/doi/abs/10.2903/sp.efsa.2013.EN-402	https://scholar.google.com/scholar?cites=7459679298851067063&as_sdt=2005&sciodt=2007&hl=en	378	2024-07-09 11:44:40		10.2903/sp.efsa.2013.EN-402							15	1.36	4	4	11	… origin (FoNAO) contaminated with pathogenic bacteria, viruses and parasites are a major … While strawberries and raspberries infected with Norovirus were graded priority one within …	https://efsa.onlinelibrary.wiley.com/doi/pdf/10.2903/sp.efsa.2013.EN-402	https://scholar.google.com/scholar?q=related:t1RamswahmcJ:scholar.google.com/&scioq=sapodila+bacterial+infection&hl=en&as_sdt=2007
379	25	K Hasan, R Islam, M Hasan, SH Sarker, ...	Effect of Alginate Edible Coatings Enriched with Black Cumin Extract for Improving Postharvest Quality Characteristics of Guava (Psidium guajava L.) Fruit	2022	Food and Bioprocess …	Springer	https://link.springer.com/article/10.1007/s11947-022-02869-2	https://scholar.google.com/scholar?cites=14004336187659878496&as_sdt=2005&sciodt=2007&hl=en	379	2024-07-09 11:44:40		10.1007/s11947-022-02869-2							25	12.5	5	5	2	… ) bacteria. The BC extract-enriched coatings showed stronger antibacterial activity against Gram-positive bacteria than Gram-negative bacteria. … with plant extract on sapodilla fruit and …	https://www.researchgate.net/profile/Rakibul-Islam-28/publication/361738627_Effect_of_Alginate_Edible_Coatings_Enriched_with_Black_Cumin_Extract_for_Improving_Postharvest_Quality_Characteristics_of_Guava_Psidium_guajava_L_Fruit/links/62c31b083f38b17066d3b5d6/Effect-of-Alginate-Edible-Coatings-Enriched-with-Black-Cumin-Extract-for-Improving-Postharvest-Quality-Characteristics-of-Guava-Psidium-guaj…	https://scholar.google.com/scholar?q=related:YICdhJBlWcIJ:scholar.google.com/&scioq=sapodila+bacterial+infection&hl=en&as_sdt=2007
380	14	MA Hossain, M Momen, MS Uddin, ...	Abundance of peach fruit fly, Bactrocera zonata (Saunders) in mango orchard	2017	Bangladesh Journal …	researchgate.net	https://www.researchgate.net/profile/Md-Hossain-83/publication/322791030_ABUNDANCE_OF_PEACH_FRUIT_FLY_BACTROCERA_ZONATA_SAUNDERS_IN_MANGO_ORCHARD/links/5a703b98458515015e624670/ABUNDANCE-OF-PEACH-FRUIT-FLY-BACTROCERA-ZONATA-SAUNDERS-IN-MANGO-ORCHARD.pdf	https://scholar.google.com/scholar?cites=12611067694835646291&as_sdt=2005&sciodt=2007&hl=en	380	2024-07-09 11:44:40	PDF								14	2	4	4	7	… Subsequently, secondary infections with bacterial and fungal diseases are frequent and in fested fruits drop down (White &Elson-Harris 1992). Also, it is considered as one of the most …	https://www.researchgate.net/profile/Md-Hossain-83/publication/322791030_ABUNDANCE_OF_PEACH_FRUIT_FLY_BACTROCERA_ZONATA_SAUNDERS_IN_MANGO_ORCHARD/links/5a703b98458515015e624670/ABUNDANCE-OF-PEACH-FRUIT-FLY-BACTROCERA-ZONATA-SAUNDERS-IN-MANGO-ORCHARD.pdf	https://scholar.google.com/scholar?q=related:Uz8VjUCDA68J:scholar.google.com/&scioq=sapodila+bacterial+infection&hl=en&as_sdt=2007
381	18	Q Jiang, S Charoensiddhi, X Xue, B Sun, ...	A review on the gastrointestinal protective effects of tropical fruit polyphenols	2023	Critical reviews in …	Taylor &Francis	https://www.tandfonline.com/doi/abs/10.1080/10408398.2022.2145456	https://scholar.google.com/scholar?cites=14272611951083251534&as_sdt=2005&sciodt=2007&hl=en	381	2024-07-09 11:44:40		10.1080/10408398.2022.2145456							18	18	4	5	1	… capacity, and to assist in infection resistance as well as the … bacteria and increase the production of good bacteria. Mutua… by beneficially modulating gut bacteria. The probiotic effects …		https://scholar.google.com/scholar?q=related:TudPMfOAEsYJ:scholar.google.com/&scioq=sapodila+bacterial+infection&hl=en&as_sdt=2007
382	12	E Ramirez-Moreno, J Soto-Sanchez, ...	Mexican medicinal plants as an alternative for the development of new compounds against protozoan parasites	2017	Natural Remedies in …	books.google.com	https://books.google.com/books?hl=en&lr=&id=4PSODwAAQBAJ&oi=fnd&pg=PA61&dq=sapodila+bacterial+infection&ots=Nx3IwHeH-u&sig=Bh8Im7CzCcCUylq8sGpWO5pviBk	https://scholar.google.com/scholar?cites=7052959977437336204&as_sdt=2005&sciodt=2007&hl=en	382	2024-07-09 11:44:40									12	1.71	4	3	7	… to avoid infection, and the treatment of infected individuals. … zapota , commonly known as the sapodilla , a long-lived, … in the intestinal tract by eating bacteria and cellular debris. In …	https://www.intechopen.com/chapters/54353	https://scholar.google.com/scholar?q=related:jBIzNrsl4WEJ:scholar.google.com/&scioq=sapodila+bacterial+infection&hl=en&as_sdt=2007
383	39	MT El-Saadony, AM Saad, HA Elakkad, ...	Flavoring and extending the shelf life of cucumber juice with aroma compounds-rich herbal extracts at 4 C through controlling chemical and microbial …	2022	Saudi Journal of …	Elsevier	https://www.sciencedirect.com/science/article/pii/S1319562X21007804	https://scholar.google.com/scholar?cites=11862641830839587925&as_sdt=2005&sciodt=2007&hl=en	383	2024-07-09 11:44:40	HTML								39	19.5	10	4	2	This work aims to enhance the flavor of functional cucumber juice using herbal extracts of peppermint, basil, lavender, and lemongrass ethanolic extracts and extend its lifetime by …	https://www.sciencedirect.com/science/article/pii/S1319562X21007804	https://scholar.google.com/scholar?q=related:VRTi6OSRoKQJ:scholar.google.com/&scioq=sapodila+bacterial+infection&hl=en&as_sdt=2007
384	22	A Safdar, SA Khan, MA Safdar	Pathogenic association and management of Botryodiplodia theobromae in guava orchards at Sheikhupura district, Pakistan	2015	International Journal of Agriculture …	academia.edu	https://www.academia.edu/download/106649488/96926_..pdf	https://scholar.google.com/scholar?cites=17084419195473185817&as_sdt=2005&sciodt=2007&hl=en	384	2024-07-09 11:44:40	PDF								22	2.44	7	3	9	… Guava decline spread mainly through root infection and the movement of infected plant material. The present study was conducted to investigate the cause of decline in guava and to …	https://www.academia.edu/download/106649488/96926_..pdf	https://scholar.google.com/scholar?q=related:GUwLvL0MGO0J:scholar.google.com/&scioq=sapodila+bacterial+infection&hl=en&as_sdt=2007
385	39	FG Coe, GJ Anderson	Ethnobotany of the Miskitu of eastern Nicaragua	1997	Journal of Ethnobiology	researchgate.net	https://www.researchgate.net/profile/Gregory-Anderson-8/publication/284422848_Ethnobotany_of_the_Miskitu_of_eastern_Nicaragua/links/56f14a8e08ae5c367d4aa01f/Ethnobotany-of-the-Miskitu-of-eastern-Nicaragua.pdf?_sg%5B0%5D=started_experiment_milestone&origin=journalDetail&_rtd=e30%3D	https://scholar.google.com/scholar?cites=18027204192654118083&as_sdt=2005&sciodt=2007&hl=en	385	2024-07-09 11:44:40	PDF								39	1.44	20	2	27	… species that provide food, the four most important are peach palm (304Bactris gasipaes), American oil palm (309 Elaeis oleiferai, Tonka bean (136 Dipteryxoleifera), and sapodilla (256)…	https://www.researchgate.net/profile/Gregory-Anderson-8/publication/284422848_Ethnobotany_of_the_Miskitu_of_eastern_Nicaragua/links/56f14a8e08ae5c367d4aa01f/Ethnobotany-of-the-Miskitu-of-eastern-Nicaragua.pdf?_sg%5B0%5D=started_experiment_milestone&origin=journalDetail&_rtd=e30%3D	https://scholar.google.com/scholar?q=related:w8yUdLN-LfoJ:scholar.google.com/&scioq=sapodila+bacterial+infection&hl=en&as_sdt=2007
386	32	BM Schmidt, DMK Cheng	Ethnobotany: A phytochemical perspective	2017		books.google.com	https://books.google.com/books?hl=en&lr=&id=sxsuDwAAQBAJ&oi=fnd&pg=PR9&dq=sapodila+bacterial+infection&ots=g1E937MeFZ&sig=qd_-4MhYT5VzfOyXSaSEuqt0wSA	https://scholar.google.com/scholar?cites=380736188068986679&as_sdt=2005&sciodt=2007&hl=en	386	2024-07-09 11:44:40	BOOK								32	4.57	16	2	7	Ethnobotany: A Phytochemical Perspective explores the chemistry behind hundreds of plant medicines, dyes, fibers, flavors, poisons, insect repellants, and many other uses of …		https://scholar.google.com/scholar?q=related:N__8uoulSAUJ:scholar.google.com/&scioq=sapodila+bacterial+infection&hl=en&as_sdt=2007
387	0	Q Dinh	Quality maintenance in fruits and vegetables in Vietnam	1995	ACIAR PROCEEDINGS	ageconsearch.umn.edu	https://ageconsearch.umn.edu/record/134719/files/PR060.pdf#page=96		387	2024-07-09 11:44:40	PDF								0	0	0	1	29	This paper outlines postharvest handling practices for maintenance of quality in bananas, oranges, lychees, pineapples, and vegetables. The results of recent studies on the use of …	https://ageconsearch.umn.edu/record/134719/files/PR060.pdf#page=96	https://scholar.google.com/scholar?q=related:lOv7TPLTx0EJ:scholar.google.com/&scioq=sapodila+bacterial+infection&hl=en&as_sdt=2007
388	0	P Haewpetch, J Kaulpiboon	Enzymatic production and characterization of glucosyl-polyols	2021		ethesisarchive.library.tu.ac.th	http://ethesisarchive.library.tu.ac.th/thesis/2021/TU_2021_5911351012_15218_18307.pdf		388	2024-07-09 11:44:40	PDF								0	0	0	2	3	… items such as pine nut, oil palm, sapodilla, and ucuhuba. This makes galactitol a potential … Dental caries is an infectious bacterial disease that results in localized demineralization and …	http://ethesisarchive.library.tu.ac.th/thesis/2021/TU_2021_5911351012_15218_18307.pdf	https://scholar.google.com/scholar?q=related:pEccMFbplK0J:scholar.google.com/&scioq=sapodila+bacterial+infection&hl=en&as_sdt=2007
389	3	CY Olivier, TJ Dumonceaux, E Pérez-López	Sustainable Management of Phytoplasma Diseases in Crops Grown in the Tropical Belt	2019		Springer	https://link.springer.com/content/pdf/10.1007/978-3-030-29650-6.pdf	https://scholar.google.com/scholar?cites=9930582723161556096&as_sdt=2005&sciodt=2007&hl=en	389	2024-07-09 11:44:40	BOOK	10.1007/978-3-030-29650-6							3	0.6	1	3	5	… Phytoplasma-infected plants exhibit symptoms of malformed … Economic losses associated with phytoplasma infections are high … and characterize this group of plant pathogenic bacteria. …	https://www.researchgate.net/profile/Jin-Zhao-31/publication/339049126_The_Resistance_of_Jujube_Trees_to_Jujube_Witches%27_Broom_Disease_in_China/links/5ef69725458515505075247b/The-Resistance-of-Jujube-Trees-to-Jujube-Witches-Broom-Disease-in-China.pdf	https://scholar.google.com/scholar?q=related:gAStSl-E0IkJ:scholar.google.com/&scioq=sapodila+bacterial+infection&hl=en&as_sdt=2007
390	48	G Paltrinieri, FAO Staff	Handling of fresh fruits, vegetables and root crops: A training manual for grenada	2014	… Italy: Food and Agriculture Organization of …	researchgate.net	https://www.researchgate.net/profile/Anoop-Srivastava/post/what_is_the_criteria_for_the_safe_limit_and_its_range_during_shelf_life_study_of_fruits_and_vegetables/attachment/5ac7627a4cde260d15d72b17/AS%3A612388961263618%401523016314477/download/a-au186e.pdf	https://scholar.google.com/scholar?cites=5300367678606381870&as_sdt=2005&sciodt=2007&hl=en	390	2024-07-09 11:44:40	PDF								48	4.8	24	2	10	… produce in the container and handling the same; and - proper field hygiene to prevent unnecessary contamination of the produce with soil, infected tools and human bacteria. …	https://www.researchgate.net/profile/Anoop-Srivastava/post/what_is_the_criteria_for_the_safe_limit_and_its_range_during_shelf_life_study_of_fruits_and_vegetables/attachment/5ac7627a4cde260d15d72b17/AS%3A612388961263618%401523016314477/download/a-au186e.pdf	https://scholar.google.com/scholar?q=related:LpNLNlKwjkkJ:scholar.google.com/&scioq=sapodila+bacterial+infection&hl=en&as_sdt=2007
391	45	E Lizundia, F Luzi, D Puglia	Organic waste valorisation towards circular and sustainable biocomposites	2022	Green Chemistry	pubs.rsc.org	https://pubs.rsc.org/en/content/articlehtml/2022/gc/d2gc01668k	https://scholar.google.com/scholar?cites=8713267330931584158&as_sdt=2005&sciodt=2007&hl=en	391	2024-07-09 11:44:40	HTML								45	22.5	15	3	2	The adoption of circular production and consumption patterns that counteract the current issues related to the depletion of natural resources, global warming, and environmental …	https://pubs.rsc.org/en/content/articlehtml/2022/gc/d2gc01668k	https://scholar.google.com/scholar?q=related:nmwx_Xi-63gJ:scholar.google.com/&scioq=sapodila+bacterial+infection&hl=en&as_sdt=2007
392	0	LYP Liu YanPing, YG Yan Gui, GJM Guo JiaMing, ...	Prenylated coumarins from the fruits of Manilkara zapota with potential anti-inflammatory effects and anti-HIV activities.	2019		cabidigitallibrary.org	https://www.cabidigitallibrary.org/doi/full/10.5555/20193502473		392	2024-07-09 11:44:40		10.5555/20193502473							0	0	0	4	5	… Manilkara zapota, usually known as Sapodilla, is a fairly slow-growing evergreen tropical … the occurrence of inflammatory diseases together with the infection of HIV. Furthermore, the …		https://scholar.google.com/scholar?q=related:R1NDG-61E1oJ:scholar.google.com/&scioq=sapodila+bacterial+infection&hl=en&as_sdt=2007
393	0	F Takeda, W Janisiewicz	FRUIT ROT CONTROL WITH BIOLOGICALLY DERIVED SUBSTANCES	1993	HortScience	journals.ashs.org	https://journals.ashs.org/downloadpdf/view/journals/hortsci/28/5/article-p469b.pdf		393	2024-07-09 11:44:40									0	0	0	2	31	… pre-dawn xylem potential of sapodilla plants. Dark respiration … (TCSA), suckering, bacterial canker infection, and PTSL death … had significantly less bacterial canker infection than Lovell. …		https://scholar.google.com/scholar?q=related:J7HaiePIfJwJ:scholar.google.com/&scioq=sapodila+bacterial+infection&hl=en&as_sdt=2007
394	0	F Gould, B Allen, D Wharton, P Whiteman	CXC Study Guide: Food, Nutrition and Health for CSEC®	2018		books.google.com	https://books.google.com/books?hl=en&lr=&id=xs7KDwAAQBAJ&oi=fnd&pg=PP1&dq=sapodila+bacterial+infection&ots=oxx2Z6LEYX&sig=d96pqWckvMBvbiukKmqPF_FDmzs		394	2024-07-09 11:44:40	BOOK								0	0	0	4	6	… Most foodborne illness is caused by bacteria. Bacteria are living organisms that are mostly … Some of the most common infections caused by bacteria include campylobacter, salmonella…		https://scholar.google.com/scholar?q=related:cnMeosDXnd8J:scholar.google.com/&scioq=sapodila+bacterial+infection&hl=en&as_sdt=2007
395	4	PD Tomke, VK Rathod	Additionally added ingredients and enrichment of beverages: an overview	2019	Value-Added Ingredients and Enrichments of …	Elsevier	https://www.sciencedirect.com/science/article/pii/B9780128166871000011	https://scholar.google.com/scholar?cites=5509997693742852505&as_sdt=2005&sciodt=2007&hl=en	395	2024-07-09 11:44:40									4	0.8	2	2	5	… Juices from orange, watermelon, and sapodilla were verified as appropriate carrier for … of lactic acid bacteria (LAB) which are important for recovering from intestinal infections, improved …		https://scholar.google.com/scholar?q=related:manDkLVxd0wJ:scholar.google.com/&scioq=sapodila+bacterial+infection&hl=en&as_sdt=2007
396	0	M Khan, W Ahmed, A Jamal, MS Khalid, MF Saeed, ...	POST HARVEST APPLICATION OF ALOE VERA GEL COUPLED WITH NEEM (AZADIRACHTA INDICA) LEAF EXTRACT MAINTAINS FRESH-CUT PEACH …		researchgate.net		https://www.researchgate.net/profile/Adil-Mihoub/publication/359579396_POST_HARVEST_APPLICATION_OF_ALOE_VERA_GEL_COUPLED_WITH_NEEM_AZADIRACHTA_INDICA_LEAF_EXTRACT_MAINTAINS_FRESH-CUT_PEACH_FRUIT_QUALITY_AND_SHELF_STORAGE_STABILITY/links/62443d3d5e2f8c7a034a4af0/POST-HARVEST-APPLICATION-OF-ALOE-VERA-GEL-COUPLED-WITH-NEEM-AZADIRACHTA-INDICA-LEAF-EXTRACT-MAINTAINS-FRESH-CUT-PEACH-FRUIT-QUALITY-AND-S…		396	2024-07-09 11:44:40	PDF								0	0	0	6		… decay losses in fruits that are caused by the fungal infection (Raghav et al. 2016). Several … chloride and storage time on quantity and quality of sapodilla fruit (Manilkara zapota L.) …	https://www.researchgate.net/profile/Adil-Mihoub/publication/359579396_POST_HARVEST_APPLICATION_OF_ALOE_VERA_GEL_COUPLED_WITH_NEEM_AZADIRACHTA_INDICA_LEAF_EXTRACT_MAINTAINS_FRESH-CUT_PEACH_FRUIT_QUALITY_AND_SHELF_STORAGE_STABILITY/links/62443d3d5e2f8c7a034a4af0/POST-HARVEST-APPLICATION-OF-ALOE-VERA-GEL-COUPLED-WITH-NEEM-AZADIRACHTA-INDICA-LEAF-EXTRACT-MAINTAINS-FRESH-CUT-PEACH-FRUIT-QUALITY-AND-S…	https://scholar.google.com/scholar?q=related:5fCHvgidmGYJ:scholar.google.com/&scioq=sapodila+bacterial+infection&hl=en&as_sdt=2007
397	1087	JC Cheftel	High-pressure, microbial inactivation and food preservation	1995	Food science and technology international	journals.sagepub.com	https://journals.sagepub.com/doi/abs/10.1177/108201329500100203	https://scholar.google.com/scholar?cites=10619222759720198187&as_sdt=2005&sciodt=2007&hl=en	397	2024-07-09 11:44:40		10.1177/108201329500100203							1087	37.48	1087	1	29	… cycles) of most vegetative microbial cells: gram-negative bacteria, yeasts, complex viruses, molds, and gram-positive bacteria, in this decreasing order of sensitivity to pressure. Much …		https://scholar.google.com/scholar?q=related:K6DdP9YOX5MJ:scholar.google.com/&scioq=sapodila+bacterial+infection&hl=en&as_sdt=2007
398	19	F Kong, S Yu, Z Feng, X Wu	Optimization of ultrasonic-assisted extraction of antioxidant compounds from Guava (Psidium guajava L.) leaves using response surface methodology	2015	Pharmacognosy Magazine	ncbi.nlm.nih.gov	https://www.ncbi.nlm.nih.gov/pmc/articles/PMC4522831/	https://scholar.google.com/scholar?cites=11924450931532709857&as_sdt=2005&sciodt=2007&hl=en	398	2024-07-09 11:44:40	HTML								19	2.11	5	4	9	… The leaves have been extensively used for the treatment of diarrhea,[3] bacterial infection, pain, and inflammation.[4] According to Hui-Yin and Gow-Chin,[5] the extracts from guava (P. …	https://www.ncbi.nlm.nih.gov/pmc/articles/PMC4522831/	https://scholar.google.com/scholar?q=related:4T-Vm_EofKUJ:scholar.google.com/&scioq=sapodila+bacterial+infection&hl=en&as_sdt=2007
399	30	M Anvari, G Khayati, S Rostami	Optimisation of medium composition for probiotic biomass production using response surface methodology	2014	Journal of Dairy Research	cambridge.org	https://www.cambridge.org/core/journals/journal-of-dairy-research/article/optimisation-of-medium-composition-for-probiotic-biomass-production-using-response-surface-methodology/CA4ECEDA1133FED8EF0FB45E30E26E3A	https://scholar.google.com/scholar?cites=13546006573628999580&as_sdt=2005&sciodt=2007&hl=en	399	2024-07-09 11:44:40									30	3	10	3	10	… of a probiotic bacterium, … the bacterium were significant, and the strongest effect was given by the yeast extract concentration. Estimated optimum conditions of the factors on the bacterial …	https://www.academia.edu/download/98492513/s002202991300073320230210-1-1r61xrd.pdf	https://scholar.google.com/scholar?q=related:nEdDejUV_bsJ:scholar.google.com/&scioq=sapodila+bacterial+infection&hl=en&as_sdt=2007
400	1	C Hemmati, M Nikooei, AM Al-Subhi, AM Al-Sadi	History and Current Status of Phytoplasma Diseases in the Middle East. Biology 2021, 10, 226	2021		researchgate.net	https://www.researchgate.net/profile/Chamran-Hemmati/publication/350071707_History_and_Current_Status_of_Phytoplasma_Diseases_in_the_Middle_East/links/604f78ed92851cd8ce43ea2a/History-and-Current-Status-of-Phytoplasma-Diseases-in-the-Middle-East.pdf	https://scholar.google.com/scholar?cites=2327593320172787640&as_sdt=2005&sciodt=2007&hl=en	400	2024-07-09 11:44:40	PDF								1	0.33	0	4	3	… reported as a result of phytoplasma or bacterial diseases [9,10]… number of hosts infected by phytoplasmas from each group. … sapodilla flattened stem disease in Iran. Asutralas. Plant Dis. …	https://www.researchgate.net/profile/Chamran-Hemmati/publication/350071707_History_and_Current_Status_of_Phytoplasma_Diseases_in_the_Middle_East/links/604f78ed92851cd8ce43ea2a/History-and-Current-Status-of-Phytoplasma-Diseases-in-the-Middle-East.pdf	https://scholar.google.com/scholar?q=related:uJd45spFTSAJ:scholar.google.com/&scioq=sapodila+bacterial+infection&hl=en&as_sdt=2007
401	221	A Chanchaichaovivat, P Ruenwongsa, B Panijpan	Screening and identification of yeast strains from fruits and vegetables: Potential for biological control of postharvest chilli anthracnose (Colletotrichum capsici)	2007	Biological Control	Elsevier	https://www.sciencedirect.com/science/article/pii/S1049964407001387	https://scholar.google.com/scholar?cites=15608489531816591050&as_sdt=2005&sciodt=2007&hl=en	401	2024-07-09 11:44:40									221	13	74	3	17	… guilliermondii at concentrations similar to those used in this study have previously been shown to have biocontrol efficacy against infection by various fungi on citrus fruit, grape fruit, …	https://citeseerx.ist.psu.edu/document?repid=rep1&type=pdf&doi=937f1c3e5fb1ad32e4628da9576db06c70420b3c	https://scholar.google.com/scholar?q=related:yr5UKIh-nNgJ:scholar.google.com/&scioq=sapodila+bacterial+infection&hl=en&as_sdt=2007
402	14	P de Brum Vieira, NLF Silva, DB Silva, NP Lopes, ...	The Caatinga endemic Manilkara rufula possesses remarkable activity against Trichomonas vaginalis and Tritrichomonas foetus	2017	Experimental …	Elsevier	https://www.sciencedirect.com/science/article/pii/S001448941630368X	https://scholar.google.com/scholar?cites=6720324696417722087&as_sdt=2005&sciodt=2007&hl=en	402	2024-07-09 11:44:40	HTML								14	2	3	5	7	… by the infection with the flagellated Trichomonas vaginalis. Each year, about 276 million people are infected with T. vaginalis worldwide (WHO, 2012). This infection is associated to …	https://www.sciencedirect.com/science/article/pii/S001448941630368X	https://scholar.google.com/scholar?q=related:515DobRjQ10J:scholar.google.com/&scioq=sapodila+bacterial+infection&hl=en&as_sdt=2007
403	30	C Marcone, MG Bellardi, A Bertaccini	Phytoplasma diseases of medicinal and aromatic plants	2016	Journal of Plant Pathology	JSTOR	https://www.jstor.org/stable/44280481	https://scholar.google.com/scholar?cites=15897392355350965275&as_sdt=2005&sciodt=2007&hl=en	403	2024-07-09 11:44:40									30	3.75	10	3	8	… the effect of phytoplasma infections on phytochemical con… compounds occurs upon phytoplasma infections. Prospects for … plant-pathogenic wall-less bacteria associated with …	https://www.academia.edu/download/77126765/2375.pdf	https://scholar.google.com/scholar?q=related:G2y0gx7intwJ:scholar.google.com/&scioq=sapodila+bacterial+infection&hl=en&as_sdt=2007
404	16	C Dolinski	Entomopathogenic nematodes against the main guava insect pests	2016	BioControl	Springer	https://link.springer.com/article/10.1007/s10526-015-9695-y	https://scholar.google.com/scholar?cites=18092883218705816562&as_sdt=2005&sciodt=2007&hl=en	404	2024-07-09 11:44:40		10.1007/s10526-015-9695-y							16	2	16	1	8	… After penetrating into the host’s hemocoel, the nematodes release their symbiotic bacteria, … nematode infection than pupae, and C. capitata prepupae were more susceptible to infection …		https://scholar.google.com/scholar?q=related:8huWXW3VFvsJ:scholar.google.com/&scioq=sapodila+bacterial+infection&hl=en&as_sdt=2007
405	0	B VAISHNAVI	STUDIES ON USE OF PLANT EXTRACTS AS NATURAL COATINGS FOR ENHANCING SHELF LIFE AND QUALITY OF BANANA FRUITS	2022		krishikosh.egranth.ac.in	https://krishikosh.egranth.ac.in/server/api/core/bitstreams/6e0b4531-c68c-43a2-a255-b7473f107fce/content		405	2024-07-09 11:44:40	PDF								0	0	0	1	2	… effect against the mesophilic bacteria and yeast and … of sapodilla fruit. The panellists did not detect any negative effect of AV gel and FI plant extract on the sensory attributes of sapodilla …	https://krishikosh.egranth.ac.in/server/api/core/bitstreams/6e0b4531-c68c-43a2-a255-b7473f107fce/content	https://scholar.google.com/scholar?q=related:ZT6pGm64QlcJ:scholar.google.com/&scioq=sapodila+bacterial+infection&hl=en&as_sdt=2007
406	2	M Monika, JJ Rokadae, SK Bhanja, M Gopi, K Gautham, ...	BVS-10 Evaluation of Betaine as Heat Ameliorating Agent in Heat Stressed Broiler Chicken		Chief Editors	academia.edu	https://www.academia.edu/download/65050407/Compendium_National_Online_Research_Paper_Presentation_Competition.pdf#page=48	https://scholar.google.com/scholar?cites=14714271900019978501&as_sdt=2005&sciodt=2007&hl=en	406	2024-07-09 11:44:40	PDF								2	0	0	6		… Collectively, these substances protect the body from infection, as well as rid or control infections once they have taken hold. Broadly, the immune system comprises two arms thatdiffer in …	https://www.academia.edu/download/65050407/Compendium_National_Online_Research_Paper_Presentation_Competition.pdf#page=48	https://scholar.google.com/scholar?q=related:BfEzYVWYM8wJ:scholar.google.com/&scioq=sapodila+bacterial+infection&hl=en&as_sdt=2007
407	9	MS Daneel	Nematode pests of minor tropical and subtropical crops	2017	Nematology in South Africa: a view from the 21st …	Springer	https://link.springer.com/chapter/10.1007/978-3-319-44210-5_17	https://scholar.google.com/scholar?cites=6774107930864353036&as_sdt=2005&sciodt=2007&hl=en	407	2024-07-09 11:44:40		10.1007/978-3-319-44210-5_17							9	1.29	9	1	7	… species, resulting in severe damage to infected trees. Litchi production is hampered by … ), this nematode occurs on papaya and banana but no records of infections of mango exist. …		https://scholar.google.com/scholar?q=related:DH9TuUV3Al4J:scholar.google.com/&scioq=sapodila+bacterial+infection&hl=en&as_sdt=2007
408	189	Y Li, JJ Zhang, DP Xu, T Zhou, Y Zhou, S Li, ...	Bioactivities and health benefits of wild fruits	2016	International journal of …	mdpi.com	https://www.mdpi.com/1422-0067/17/8/1258	https://scholar.google.com/scholar?cites=3261435177592160721&as_sdt=2005&sciodt=2007&hl=en	408	2024-07-09 11:44:40	HTML								189	23.63	27	7	8	… pathogenic bacteria, both Gram (+) and gram (−). Among them, the most sensitive bacteria … for 1 h after infection of 8 to 9 h, indicating that the extract inhibited the virus release from the …	https://www.mdpi.com/1422-0067/17/8/1258	https://scholar.google.com/scholar?q=related:0QFYogPyQi0J:scholar.google.com/&scioq=sapodila+bacterial+infection&hl=en&as_sdt=2007
409	4	O Bashir, T Amin, SZ Hussain, HR Naik, ...	Development, characterization and use of rosemary essential oil loaded water-chestnut starch based nanoemulsion coatings for enhancing post-harvest …	2023	Current Research in …	Elsevier	https://www.sciencedirect.com/science/article/pii/S2665927123001387	https://scholar.google.com/scholar?cites=8145437787910557649&as_sdt=2005&sciodt=2007&hl=en	409	2024-07-09 11:44:40	HTML								4	4	1	5	1	… To calculate the total bacterial count, 1 mL from each sample was transferred to plate count … , maintained higher TA values of blueberry and sapodilla fruit throughout the storage. …	https://www.sciencedirect.com/science/article/pii/S2665927123001387	https://scholar.google.com/scholar?q=related:0c9zAINoCnEJ:scholar.google.com/&scioq=sapodila+bacterial+infection&hl=en&as_sdt=2007
410	0	V Singh, P Kapoor, A Kumar	Bakanae Disease-A Serious threat to Basmati Rice Production in India	2022	Journal of Cereal Research	academia.edu	https://www.academia.edu/download/87232754/01VikramSinghReview.pdf		410	2024-07-09 11:44:40	PDF								0	0	0	3	2	… Seed-borne inoculum, in general, serve as an initial site or focus for secondary infection. Infected … Gram positive bacteria associated with rice in China and their antagonists against the …	https://www.academia.edu/download/87232754/01VikramSinghReview.pdf	https://scholar.google.com/scholar?q=related:X0thTMepsF0J:scholar.google.com/&scioq=sapodila+bacterial+infection&hl=en&as_sdt=2007
411	5	KW Nderitu, E Mecha, A Nyachieo	Solanum nigrum show anti-obesity effects on high-fat diet-fed Sprague Dawley rats in a randomized study	2023	Scientific African	Elsevier	https://www.sciencedirect.com/science/article/pii/S2468227623001692	https://scholar.google.com/scholar?cites=17678261494282040174&as_sdt=2005&sciodt=2007&hl=en	411	2024-07-09 11:44:40	HTML								5	5	2	3	1	… It is commonly known as Managu in Kenya and has been used globally for different treatments such as management of human bacterial infections, stomach upsets, diabetes, high blood …	https://www.sciencedirect.com/science/article/pii/S2468227623001692	https://scholar.google.com/scholar?q=related:brMlZSrNVfUJ:scholar.google.com/&scioq=sapodila+bacterial+infection&hl=en&as_sdt=2007
412	0	AK AlWahaibi	Fruit Flies Fauna, Bio-ecology, Economic Importance and Management with an Overview of the Current State of Knowledge in the Sultanate of Oman and the Arabian …	2024	Journal of Agricultural and Marine Sciences …	journals.squ.edu.om	https://journals.squ.edu.om/index.php/jams/article/view/6536		412	2024-07-09 11:44:40									0	0	0	1	1	… They are associated with and infected by nematodes, bacteria, fungi, and viruses. An overview of the relationship between tephritid fruit flies and their natural enemies is given below. …	https://journals.squ.edu.om/index.php/jams/article/download/6536/4113	https://scholar.google.com/scholar?q=related:k5-zomDzHoAJ:scholar.google.com/&scioq=sapodila+bacterial+infection&hl=en&as_sdt=2007
413	62	M Rai, AP Ingle, J Trzcińska-Wencel, M Wypij, S Bonde, ...	Biogenic silver nanoparticles: what we know and what do we need to know?	2021	Nanomaterials	mdpi.com	https://www.mdpi.com/2079-4991/11/11/2901	https://scholar.google.com/scholar?cites=16587815569713795802&as_sdt=2005&sciodt=2007&hl=en	413	2024-07-09 11:44:40	HTML								62	20.67	10	6	3	… Bacteria also have potential to synthesize metal … ability of infected macrophages, reducing infection without inducing … The nanocomposite films increased the shelf life of sapodilla fruits, …	https://www.mdpi.com/2079-4991/11/11/2901	https://scholar.google.com/scholar?q=related:2hJ86F_CM-YJ:scholar.google.com/&scioq=sapodila+bacterial+infection&hl=en&as_sdt=2007
414	31	AG Gadhavi, BN Patel, DM Patel, CN Patel	Medicated Chewing Gum-A 21st Century Drug Delivery Sysytem	2011	International journal of …	Citeseer	https://citeseerx.ist.psu.edu/document?repid=rep1&type=pdf&doi=abbcaccee2e4c378c565674b2e126dfc99a308ec	https://scholar.google.com/scholar?cites=10271635075568573574&as_sdt=2005&sciodt=2007&hl=en	414	2024-07-09 11:44:40	PDF								31	2.38	8	4	13	… (untreated) material for chewing gum is natural gum chicle, obtained from the sapodilla tree, a … of toothache, periodontal disease, bacterial and fungal infections, aphthous and dental …	https://citeseerx.ist.psu.edu/document?repid=rep1&type=pdf&doi=abbcaccee2e4c378c565674b2e126dfc99a308ec	https://scholar.google.com/scholar?q=related:hhy1Ba4tjI4J:scholar.google.com/&scioq=sapodila+bacterial+infection&hl=en&as_sdt=2007
415	0	RE Litz, GA Moore, C Srinivasan	In Vitro Systems for Propagation and Improvement of Tropical Fruits and	2011	Horticultural Reviews, Volume …	books.google.com	https://books.google.com/books?hl=en&lr=&id=KKLLCgAAQBAJ&oi=fnd&pg=PA157&dq=sapodila+bacterial+infection&ots=0M2-n4Ojb7&sig=JZV2BBUQczHOPe5s2RB9XDBfEt4		415	2024-07-09 11:44:40									0	0	0	3	13	… of polyembryonic cultivars are generally free of infections that might have affected the parent plant. … Systemic bacterial infections are difficult to control in field-grown stock plants, and …		https://scholar.google.com/scholar?q=related:qPfxm--FxrMJ:scholar.google.com/&scioq=sapodila+bacterial+infection&hl=en&as_sdt=2007
416	2	MW Haider, M Nafees, R Iqbal, S Ali, HU Asad, ...	Combined application of hot water treatment and eucalyptus leaf extract postpones seneṣcence in harvested green chilies by conserving their antioxidants: a …	2023	BMC Plant …	Springer	https://link.springer.com/article/10.1186/s12870-023-04588-y	https://scholar.google.com/scholar?cites=4937990963968523977&as_sdt=2005&sciodt=2007&hl=en	416	2024-07-09 11:44:40	HTML	10.1186/s12870-023-04588-y							2	2	0	6	1	… 2.25–4.5 mgL − 1 to apple fruits reduced fungal and bacterial colony formation by 25–40%. … in the bacterial colony. The development of fruits' resistance to fungal infection may be …	https://link.springer.com/article/10.1186/s12870-023-04588-y	https://scholar.google.com/scholar?q=related:yb5uf55Eh0QJ:scholar.google.com/&scioq=sapodila+bacterial+infection&hl=en&as_sdt=2007
417	0	K Sebastian, B Bindu	Physiological, biochemical and microbial changes associated with ripening and shelf life extension of Surya papaya as influenced by postharvest treatments	2024	Journal of Applied Horticulture	researchgate.net	https://www.researchgate.net/profile/Dr-Bindu-B/publication/380909602_Physiological_biochemical_and_microbial_changes_associated_with_ripening_and_shelf_life_extension_of_Surya_papaya_as_influenced_by_postharvest_treatments/links/66559da922a7f16b4f51f54d/Physiological-biochemical-and-microbial-changes-associated-with-ripening-and-shelf-life-extension-of-Surya-papaya-as-influenced-by-postharvest-t…		417	2024-07-09 11:44:40	PDF								0	0	0	2	1	… the infection categories X = maximum number of infection categories … used for enumeration of bacterial and fungal population of … The number of fruits infected with anthracnose showed …	https://www.researchgate.net/profile/Dr-Bindu-B/publication/380909602_Physiological_biochemical_and_microbial_changes_associated_with_ripening_and_shelf_life_extension_of_Surya_papaya_as_influenced_by_postharvest_treatments/links/66559da922a7f16b4f51f54d/Physiological-biochemical-and-microbial-changes-associated-with-ripening-and-shelf-life-extension-of-Surya-papaya-as-influenced-by-postharvest-t…	https://scholar.google.com/scholar?q=related:OhfkJjFOdpEJ:scholar.google.com/&scioq=sapodila+bacterial+infection&hl=en&as_sdt=2007
418	16	WJ Lin, MC Chiu, CC Lin, YK Chung, JY Chou	Efficacy of Entomopathogenic fungus Aspergillus nomius against Dolichoderus thoracicus	2021	BioControl	Springer	https://link.springer.com/article/10.1007/s10526-021-10086-7	https://scholar.google.com/scholar?cites=13633904281427201833&as_sdt=2005&sciodt=2007&hl=en	418	2024-07-09 11:44:40		10.1007/s10526-021-10086-7							16	5.33	3	5	3	… were used to investigate the route of infection in D. thoracicus … the mechanism underlying the infection of A. nomius among … 98% lactic acid to prevent bacterial growth, and incubated at …	https://www.researchgate.net/profile/Wei-Jiun-Lin-2/publication/350154861_Efficacy_of_Entomopathogenic_fungus_Aspergillus_nomius_against_Dolichoderus_thoracicus/links/605986b5a6fdccbfeafca928/Efficacy-of-Entomopathogenic-fungus-Aspergillus-nomius-against-Dolichoderus-thoracicus.pdf	https://scholar.google.com/scholar?q=related:KU8lXLVbNb0J:scholar.google.com/&scioq=sapodila+bacterial+infection&hl=en&as_sdt=2007
419	30	GR Lewis, GR Lewis	1001 Chemicals in everyday products	1999		academia.edu	https://www.academia.edu/download/54320020/1001_Chemicals_in_Everyday_Products_-_G._Lewis_1999_WW.pdf	https://scholar.google.com/scholar?cites=4703000734721062525&as_sdt=2005&sciodt=2007&hl=en	419	2024-07-09 11:44:40	BOOK								30	1.2	15	2	25	… from preservatives or the risk of sickness from bacteria that might be present in the food if … otics should only be prescribed for bacterial infections and the patient should take all of the …	https://www.academia.edu/download/54320020/1001_Chemicals_in_Everyday_Products_-_G._Lewis_1999_WW.pdf	https://scholar.google.com/scholar?q=related:fTZzK0BqREEJ:scholar.google.com/&scioq=sapodila+bacterial+infection&hl=en&as_sdt=2007
420	16	M Siampour, K Izadpanah, M Salehi, ...	Occurrence and distribution of phytoplasma diseases in Iran	2019	… of Phytoplasma Diseases …	Springer	https://link.springer.com/chapter/10.1007/978-3-030-29650-6_3	https://scholar.google.com/scholar?cites=495395209761940538&as_sdt=2005&sciodt=2007&hl=en	420	2024-07-09 11:44:40		10.1007/978-3-030-29650-6_3							16	3.2	4	4	5	… province infected with a 16SrVI phytoplasma. (b) Witches’ broom symptoms on a tomato plant in Bushehr province infected with a 16SrII phytoplasma. (c) Wild lettuce plant infected with …	https://www.researchgate.net/profile/Jin-Zhao-31/publication/339049126_The_Resistance_of_Jujube_Trees_to_Jujube_Witches'_Broom_Disease_in_China/links/5ef69725458515505075247b/The-Resistance-of-Jujube-Trees-to-Jujube-Witches-Broom-Disease-in-China.pdf#page=55	https://scholar.google.com/scholar?q=related:OmRKjVH_3wYJ:scholar.google.com/&scioq=sapodila+bacterial+infection&hl=en&as_sdt=2007
421	14	CA Serra, PE Jorge, AJ Abud-Antún, P Alvarez, ...	Invasive alien species in the Dominican Republic: their impact and strategies to manage introduced pests	2003		ageconsearch.umn.edu	https://ageconsearch.umn.edu/record/256720/	https://scholar.google.com/scholar?cites=7160249191331706806&as_sdt=2005&sciodt=2007&hl=en	421	2024-07-09 11:44:40									14	0.67	3	5	21	… Alien pests often cause restrictions or bans on potentially infested or infected export products … Rahtonia solanacearum (EF Smith) (Proteobacteria), this bacterial wilt of potato bacterium …	https://ageconsearch.umn.edu/record/256720/files/1-15.pdf	https://scholar.google.com/scholar?q=related:trea8LNQXmMJ:scholar.google.com/&scioq=sapodila+bacterial+infection&hl=en&as_sdt=2007
422	10	B Luo, Y Wen, F Ye, Y Wu, N Li, MS Farid, ...	Bioactive phytochemicals and their potential roles in modulating gut microbiota	2023	Journal of Agriculture …	Elsevier	https://www.sciencedirect.com/science/article/pii/S266615432300090X	https://scholar.google.com/scholar?cites=12769794041774460945&as_sdt=2005&sciodt=2007&hl=en	422	2024-07-09 11:44:40	HTML								10	10	1	7	1	… effects at different stages of infection through different pathways [11]. … bacteria, viruses, protozoa, and yeasts, with bacteria making up the major part [13,14]. Ninety percent of bacteria …	https://www.sciencedirect.com/science/article/pii/S266615432300090X	https://scholar.google.com/scholar?q=related:EdDdEgZsN7EJ:scholar.google.com/&scioq=sapodila+bacterial+infection&hl=en&as_sdt=2007
423	7	NG Qazi, A Khan, SW Abbasi, I Malik, ...	Effect of Rumex dentatus on Gastrointestinal Protection and Toxicology in Rodents via Investigating H+/K+-ATPase, Calcium Channels, and PDE Mediated …	2022	Frontiers in …	frontiersin.org	https://www.frontiersin.org/articles/10.3389/fphar.2022.936161/full	https://scholar.google.com/scholar?cites=1135344911157208384&as_sdt=2005&sciodt=2007&hl=en	423	2024-07-09 11:44:40	HTML	10.3389/fphar.2022.936161							7	3.5	1	5	2	… Dealing with multidrug-resistant (MDR) microorganisms is a key issue in the chemotherapeutic management of infectious diseases, thus researchers are focused on natural products to …	https://www.frontiersin.org/articles/10.3389/fphar.2022.936161/full	https://scholar.google.com/scholar?q=related:QKUSby6OwQ8J:scholar.google.com/&scioq=sapodila+bacterial+infection&hl=en&as_sdt=2007
424	0	CDT Freitas, D Demarco, JS Oliveira, MV Ramos	Laticifer as a plant defense mechanism	2024	Plant Science	Elsevier	https://www.sciencedirect.com/science/article/pii/S0168945224001638		424	2024-07-09 11:44:40									0	0	0	4	1	… Rubber's adhesive properties impede the penetration of virus particles, bacteria, or fungal spores into plant tissues, thereby reducing infections after physical damage (Ramos et al., …		https://scholar.google.com/scholar?q=related:3ZdgboKW-E8J:scholar.google.com/&scioq=sapodila+bacterial+infection&hl=en&as_sdt=2007
425	5	CF Langworthy	Use of fruit as food	1907		books.google.com	https://books.google.com/books?hl=en&lr=&id=wsRoSL9shxIC&oi=fnd&pg=PA7&dq=sapodila+bacterial+infection&ots=gSMhjWlq5n&sig=tDikHkBP_42UiuyxqFn-bKNNB18	https://scholar.google.com/scholar?cites=14843849460282294986&as_sdt=2005&sciodt=2007&hl=en	425	2024-07-09 11:44:40	BOOK								5	0.04	5	1	117	… The sapodilla, a tropical fruit which thrives in regions like the warmer parts of Florida, suggests a good sized russet … The sapodilla is a not uncommon commercial fruit in large fruit shops. …	https://books.google.com/books?hl=en&lr=&id=wsRoSL9shxIC&oi=fnd&pg=PA7&dq=sapodila+bacterial+infection&ots=gSMhjWlq5n&sig=tDikHkBP_42UiuyxqFn-bKNNB18	https://scholar.google.com/scholar?q=related:ygKAI3Dy_80J:scholar.google.com/&scioq=sapodila+bacterial+infection&hl=en&as_sdt=2007
426	2	J Safron	The Raw Truth: The Art of Preparing Living Foods	2003		Celestial Arts		https://scholar.google.com/scholar?cites=12810205564625350512&as_sdt=2005&sciodt=2007&hl=en	426	2024-07-09 11:44:40	CITATION								2	0.1	2	1	21			https://scholar.google.com/scholar?q=related:cO858xb-xrEJ:scholar.google.com/&scioq=sapodila+bacterial+infection&hl=en&as_sdt=2007
427	181	DJ Lewis	Phlebotomid sandflies	1971	Bulletin of the World Health Organization	ncbi.nlm.nih.gov	https://www.ncbi.nlm.nih.gov/pmc/articles/PMC2427821/	https://scholar.google.com/scholar?cites=3120294155794461657&as_sdt=2005&sciodt=2007&hl=en	427	2024-07-09 11:44:40									181	3.42	181	1	53	… It would be interesting to know if sugar-feeding introduces into the gut bacteria that … sapodilla trees and thus chicleros, who enter the forest to gather the material, may become infected …	https://www.ncbi.nlm.nih.gov/pmc/articles/PMC2427821/pdf/bullwho00201-0064.pdf	https://scholar.google.com/scholar?q=related:2TPbrgCDTSsJ:scholar.google.com/&scioq=sapodila+bacterial+infection&hl=en&as_sdt=2007
428	0	H Brüssow, H Brüssow	Eating Cultures	2007	The Quest for Food: A Natural History of Eating	Springer	https://link.springer.com/content/pdf/10.1007/0-387-45461-6_6.pdf		428	2024-07-09 11:44:40		10.1007/0-387-45461-6_6							0	0	0	2	17	… In response to bacterial infection, serotonin is produced in one specific neuron called ADF. Another neuron receives information about bacterial food from a sensory neuron and …		https://scholar.google.com/scholar?q=related:BPw8fjjiJG0J:scholar.google.com/&scioq=sapodila+bacterial+infection&hl=en&as_sdt=2007
429	6	D Lingait, R Rahagude, SS Gaharwar, RS Das, ...	A review on versatile applications of biomaterial/polycationic chitosan: An insight into the structure-property relationship	2023	International Journal of …	Elsevier	https://www.sciencedirect.com/science/article/pii/S0141813023055757	https://scholar.google.com/scholar?cites=6558877854447683735&as_sdt=2005&sciodt=2007&hl=en	429	2024-07-09 11:44:40									6	6	1	5	1	… and gram-negative bacteria since the outer membrane of the bacteria acts as a barrier between the bacterial membrane and the environment. Gram-positive bacteria have loose cell …		https://scholar.google.com/scholar?q=related:l8iHf6jQBVsJ:scholar.google.com/&scioq=sapodila+bacterial+infection&hl=en&as_sdt=2007
430	8	AK Thompson	Postharvest chemical and physical deterioration of fruit and vegetables	2010	Chemical deterioration and physical instability of food …	Elsevier	https://www.sciencedirect.com/science/article/pii/B9781845694951500174	https://scholar.google.com/scholar?cites=9914686262559754669&as_sdt=2005&sciodt=2007&hl=en	430	2024-07-09 11:44:40									8	0.57	8	1	14	… are caused by infections with fungi and bacteria. Virus infections can cause diseases that … in which to grow and develop whereas bacteria thrive best in neutral conditions and only a …		https://scholar.google.com/scholar?q=related:rclRI6AKmIkJ:scholar.google.com/&scioq=sapodila+bacterial+infection&hl=en&as_sdt=2007
431	3	J Schwarcz	Monkeys, Myths, and Molecules: Separating Fact from Fiction in the Science of Everyday Life	2015		books.google.com	https://books.google.com/books?hl=en&lr=&id=pEclBQAAQBAJ&oi=fnd&pg=PT3&dq=sapodila+bacterial+infection&ots=rG7BpVIpUj&sig=arCY2eN-QRVM5p_036Jh6iYMm6Y	https://scholar.google.com/scholar?cites=7752775562197673323&as_sdt=2005&sciodt=2007&hl=en	431	2024-07-09 11:44:40	BOOK								3	0.33	3	1	9	… Tragically, a young girl succumbed to the effects of this bacterium, having been infected by … than natural substances like the sap of the sapodilla tree, commonly known as chicle. The …		https://scholar.google.com/scholar?q=related:ayUfQExkl2sJ:scholar.google.com/&scioq=sapodila+bacterial+infection&hl=en&as_sdt=2007
432	114	AA Kader, EM Yahia	Postharvest biology of tropical and subtropical fruits	2011	Postharvest biology and technology of tropical and …	Elsevier	https://www.sciencedirect.com/science/article/pii/B978184569733450003X	https://scholar.google.com/scholar?cites=2148508317180109424&as_sdt=2005&sciodt=2007&hl=en	432	2024-07-09 11:44:40									114	8.77	57	2	13	… fruit, pineapple, prickly pear, rambutan, sapodilla, soursop and sweetsop; a few of these … injury and susceptibility to attacks by microorganisms (bacteria, fungi) and insect infestation. …		https://scholar.google.com/scholar?q=related:cCJ-Yu4I0R0J:scholar.google.com/&scioq=sapodila+bacterial+infection&hl=en&as_sdt=2007
433	1	ZAN Hanani, KL Soo, WIW Zunairah, S Radhiah	Prolonging the shelf life of fresh-cut guava (Psidium guajaya L.) by coating with chitosan and cinnamon essential oil	2023	Heliyon	cell.com	https://www.cell.com/heliyon/fulltext/S2405-8440(23)09627-5?uuid=uuid%3A219721f4-d910-47a7-8bb0-cb8beea9567c	https://scholar.google.com/scholar?cites=6840524210590069929&as_sdt=2005&sciodt=2007&hl=en	433	2024-07-09 11:44:40	HTML								1	1	0	4	1	This study investigated the effect of a coating of chitosan (CH) and cinnamon essential oil (CEO; 0−1 %) on the quality attributes of fresh-cut guava (Psidium guajaya L.) during storage …	https://www.cell.com/heliyon/fulltext/S2405-8440(23)09627-5?uuid=uuid%3A219721f4-d910-47a7-8bb0-cb8beea9567c	https://scholar.google.com/scholar?q=related:qTSu4YZs7l4J:scholar.google.com/&scioq=sapodila+bacterial+infection&hl=en&as_sdt=2007
434	6	PP Reddy	Emerging crop pest problems: redefining management strategies	2018		books.google.com	https://books.google.com/books?hl=en&lr=&id=sRaNDwAAQBAJ&oi=fnd&pg=PP1&dq=sapodila+bacterial+infection&ots=73t0gG65yO&sig=-UeRFcrUpx924kCKm1UnTsHnn3Q	https://scholar.google.com/scholar?cites=11494835348565956411&as_sdt=2005&sciodt=2007&hl=en	434	2024-07-09 11:44:40	BOOK								6	1	6	1	6	… Plant introductions are a major way in which bacteria, viruses and fungi are introduced, but … the bacterial plant pathogens. So pathogens move in trade and they move in infected plant …		https://scholar.google.com/scholar?q=related:O5fg5tjbhZ8J:scholar.google.com/&scioq=sapodila+bacterial+infection&hl=en&as_sdt=2007
435	346	ML Oldfield	The value of conserving genetic resources	1984		books.google.com	https://books.google.com/books?hl=en&lr=&id=KYcfYzHdbQsC&oi=fnd&pg=PA4&dq=sapodila+bacterial+infection&ots=DETlbhCyry&sig=VLkbZCa3mvTalTebY22v4RgrNjQ	https://scholar.google.com/scholar?cites=14335423610796887610&as_sdt=2005&sciodt=2007&hl=en	435	2024-07-09 11:44:40	BOOK								346	8.65	346	1	40	… 8 Chips of elm wood infected with Dutch elm disease. 167 9 A cross-section of an American elm branch infected … 20 Leucaena root nodules that house the bacterial symbiont Rhizobium. …	https://books.google.com/books?hl=en&lr=&id=KYcfYzHdbQsC&oi=fnd&pg=PA4&dq=sapodila+bacterial+infection&ots=DETlbhCyry&sig=VLkbZCa3mvTalTebY22v4RgrNjQ	https://scholar.google.com/scholar?q=related:Os5LWtKn8cYJ:scholar.google.com/&scioq=sapodila+bacterial+infection&hl=en&as_sdt=2007
436	17	J Shi, R Zhang, X Liu, Y Zhang, Y Du, H Dong, ...	Advances in multifunctional biomass-derived nanocomposite films for active and sustainable food packaging	2023	Carbohydrate …	Elsevier	https://www.sciencedirect.com/science/article/pii/S0144861722012280	https://scholar.google.com/scholar?cites=2156303610514282512&as_sdt=2005&sciodt=2007&hl=en	436	2024-07-09 11:44:40									17	17	2	7	1	… properties against foodborne pathogenic bacteria (eg, E. coli and L. monocytogenes). … -AuNPs nanocomposite films protected sapodilla fruits from microbial infection and prolonged the …		https://scholar.google.com/scholar?q=related:EJiYjLW67B0J:scholar.google.com/&scioq=sapodila+bacterial+infection&hl=en&as_sdt=2007
437	2	K Kugui, LA Mwamburi, EK Kiprop	Efficacy of plant extracts and extracting agents against Colletotrichum gloeosporoides of pawpaw fruits	2020	African Crop Science Journal	ajol.info	https://www.ajol.info/index.php/acsj/article/view/201808	https://scholar.google.com/scholar?cites=9074085200117855255&as_sdt=2005&sciodt=2007&hl=en	437	2024-07-09 11:44:40									2	0.5	1	3	4	… Infected pawpaw of anthracnose that were collected from the samples were stained and … on physicochemical and antioxidant activity of sapodilla fruit during postharvest storage. Food …	https://www.ajol.info/index.php/acsj/article/view/201808/190308	https://scholar.google.com/scholar?q=related:F3Sntmmg7X0J:scholar.google.com/&scioq=sapodila+bacterial+infection&hl=en&as_sdt=2007
438	0	D Rokaya	Applications of Biotechnology for Maxillofacial Rehabilitation in Clinical Dentistry						438	2024-07-09 11:44:40	CITATION								0	0	0	1				https://scholar.google.com/scholar?q=related:4QSJ6z9XtnsJ:scholar.google.com/&scioq=sapodila+bacterial+infection&hl=en&as_sdt=2007
439	1	PR Fisher, RD Heins	Prediction and control of stem elongation in poinsettia	1993	HortScience	journals.ashs.org	https://journals.ashs.org/downloadpdf/view/journals/hortsci/28/5/article-p490a.pdf	https://scholar.google.com/scholar?cites=12371982273297591718&as_sdt=2005&sciodt=2007&hl=en	439	2024-07-09 11:44:40									1	0.03	1	2	31	… pre-dawn xylem potential of sapodilla plants. Dark respiration … (TCSA), suckering, bacterial canker infection, and PTSL death … had significantly less bacterial canker infection than Lovell. …		https://scholar.google.com/scholar?q=related:pi1V91McsqsJ:scholar.google.com/&scioq=sapodila+bacterial+infection&hl=en&as_sdt=2007
440	136	KB Badii, MK Billah, K Afreh-Nuamah, D Obeng-Ofori, ...	Review of the pest status, economic impact and management of fruit-infesting flies (Diptera: Tephritidae) in Africa	2015		udsspace.uds.edu.gh	http://www.udsspace.uds.edu.gh/handle/123456789/296	https://scholar.google.com/scholar?cites=6110505890875486662&as_sdt=2005&sciodt=2007&hl=en	440	2024-07-09 11:44:40									136	15.11	27	5	9	… During oviposition, fruitrottening bacteria from the intestinal flora of the fly … Fruit flies do not attack certain fruits such as papaya, banana and sapodilla when they are 100% green. Only …	http://www.udsspace.uds.edu.gh/bitstream/123456789/296/1/REVIEW%20OF%20THE%20PEST%20STATUS%2C%20ECONOMIC%20IMPACT%20AND%20MANAGEMENT%20OF%20FRUIT-INFESTING%20FILES%20%28DIPTERATEPHRITIDAE%29%20IN%20AFRICA.pdf	https://scholar.google.com/scholar?q=related:xrGQn7vgzFQJ:scholar.google.com/&scioq=sapodila+bacterial+infection&hl=en&as_sdt=2007
441	9	B Rodrigues Jardim, ...	The observation of taxonomic boundaries for the 16SrII and 16SrXXV phytoplasmas using genome-based delimitation	2023	… of Systematic and …	microbiologyresearch.org	https://www.microbiologyresearch.org/content/journal/ijsem/10.1099/ijsem.0.005977	https://scholar.google.com/scholar?cites=2360193277722313208&as_sdt=2005&sciodt=2007&hl=en	441	2024-07-09 11:44:40	HTML	10.1099/ijsem.0.005977							9	9	5	2	1	… species and, based on criteria used for other bacterial families, provided evidence that it could be … bacteria can be further refined at the genus, species, and subspecies taxonomic ranks. …	https://www.microbiologyresearch.org/content/journal/ijsem/10.1099/ijsem.0.005977	https://scholar.google.com/scholar?q=related:-EHn_0cXwSAJ:scholar.google.com/&scioq=sapodila+bacterial+infection&hl=en&as_sdt=2007
442	2	G Strobel, VP Bui, H Su, P Himmel, P Marrone, ...	Muscodor albus strain producing volatile organic compounds and methods of use	2020	US Patent …	Google Patents	https://patents.google.com/patent/US10869482B2/en	https://scholar.google.com/scholar?cites=8754150743237953637&as_sdt=2005&sciodt=2007&hl=en	442	2024-07-09 11:44:40									2	0.5	0	6	4	… In particular endophytic fungi and bacteria, fungi and bacteria living with the tissues of host plants, specifically on … Phytopathogenic infection may be caused by bacteria and/or fungus. …	https://patentimages.storage.googleapis.com/14/3e/fa/f7042c72709c67/US10869482.pdf	https://scholar.google.com/scholar?q=related:ZYjrMLj9fHkJ:scholar.google.com/&scioq=sapodila+bacterial+infection&hl=en&as_sdt=2007
443	1	WAP Isaac, A Khan	Natural Crop Protection Methods in the Caribbean	2015	2Sustainable Food Production	cgspace.cgiar.org	https://cgspace.cgiar.org/bitstreams/e78c8429-5d79-4e61-bbbc-d36afeb4335a/download#page=166	https://scholar.google.com/scholar?cites=6119866469910585226&as_sdt=2005&sciodt=2007&hl=en	443	2024-07-09 11:44:40	PDF								1	0.11	1	2	9	With the ever increasing population throughout the Caribbean, satisfying the demand for food becomes the very basic goal of regional agricultural production efforts. Crop production is, …	https://cgspace.cgiar.org/bitstreams/e78c8429-5d79-4e61-bbbc-d36afeb4335a/download#page=166	https://scholar.google.com/scholar?q=related:ih_YQyEi7lQJ:scholar.google.com/&scioq=sapodila+bacterial+infection&hl=en&as_sdt=2007
444	3	PA Foster	Paleopathological assessment of Maya ossuary remains from Colha, Belize	1997		ttu-ir.tdl.org	https://ttu-ir.tdl.org/bitstreams/238ae91c-34b0-49d7-af8e-e457d02b3f9d/download	https://scholar.google.com/scholar?cites=13192628264599695688&as_sdt=2005&sciodt=2007&hl=en	444	2024-07-09 11:44:40	PDF								3	0.11	3	1	27	… bacterial infections in which the individual's immune response did not entirely eliminate the infectious … The zapote or sapodilla (Acgras zopota) is also a useful tree. It is the source of …	https://ttu-ir.tdl.org/bitstreams/238ae91c-34b0-49d7-af8e-e457d02b3f9d/download	https://scholar.google.com/scholar?q=related:SDE-VYKhFbcJ:scholar.google.com/&scioq=sapodila+bacterial+infection&hl=en&as_sdt=2007
445	0	RC Herner	EFFECT OF PERFORATED FILM PACKAGES ON STORAGE OF ASPARAGUS	1993	HortScience	journals.ashs.org	https://journals.ashs.org/downloadpdf/view/journals/hortsci/28/5/article-p510e.pdf		445	2024-07-09 11:44:40									0	0	0	1	31	… pre-dawn xylem potential of sapodilla plants. Dark respiration … (TCSA), suckering, bacterial canker infection, and PTSL death … had significantly less bacterial canker infection than Lovell. …		https://scholar.google.com/scholar?q=related:V73iUWw06f4J:scholar.google.com/&scioq=sapodila+bacterial+infection&hl=en&as_sdt=2007
446	5	M Workineh, M Enyew	Review the extent and cause of post harvest loss of fruits and vegetables in Ethiopia	2021	Journal of Biology, Agriculture …	pdfs.semanticscholar.org	https://pdfs.semanticscholar.org/aaa1/fa9d29b12ec37b42f2db8224bc10740d84fa.pdf	https://scholar.google.com/scholar?cites=1739731680586421704&as_sdt=2005&sciodt=2007&hl=en	446	2024-07-09 11:44:40	PDF								5	1.67	3	2	3	… At least 36% of vegetable decay is caused by soft rot bacteria, with the source of infection coming … Studies on the ripening and frozen storage of sapodilla Achras sapota L. Estudios de …	https://pdfs.semanticscholar.org/aaa1/fa9d29b12ec37b42f2db8224bc10740d84fa.pdf	https://scholar.google.com/scholar?q=related:yNXY-b7EJBgJ:scholar.google.com/&scioq=sapodila+bacterial+infection&hl=en&as_sdt=2007
447	52	N Khan, S Fahad, M Naushad, ...	Grape production critical review in the world	2020	Available at SSRN …	papers.ssrn.com	https://papers.ssrn.com/sol3/papers.cfm?abstract_id=3632100	https://scholar.google.com/scholar?cites=9829533408726663590&as_sdt=2005&sciodt=2007&hl=en	447	2024-07-09 11:44:40									52	13	13	4	4	… , Alzheimer’s disease, viral infections and fungal infections. Resveratrol reduces the risk of … This seems to be beneficial for not only promoting bacterial diversity, but also preventing …	https://www.researchgate.net/profile/Shah-Fahad-21/publication/341309974_Grape_Production_Critical_Review_in_the_World/links/5eba0f35299bf1287f7fc6e5/Grape-Production-Critical-Review-in-the-World.pdf	https://scholar.google.com/scholar?q=related:psH8Xo6EaYgJ:scholar.google.com/&scioq=sapodila+bacterial+infection&hl=en&as_sdt=2007
448	10	EM Yahia, A Carrillo-López, A Sañudo	Physiological disorders and their control	2019	Postharvest technology of …	Elsevier	https://www.sciencedirect.com/science/article/pii/B9780128132760000158	https://scholar.google.com/scholar?cites=6948033083225658081&as_sdt=2005&sciodt=2007&hl=en	448	2024-07-09 11:44:40									10	2	3	3	5	… Physiological disorders are those that are not caused by fungal, bacterial, viral, or insect agents, but rather by physiological and/or biochemical causes. Physiological disorders can …		https://scholar.google.com/scholar?q=related:4dJT5UZfbGAJ:scholar.google.com/&scioq=sapodila+bacterial+infection&hl=en&as_sdt=2007
449	11	KB Palipane, R Rolle	Good practice for assuring the post-harvest quality of exotic tree fruit crops produced in Jamaica	2008	… ORGANIZATION OF THE UNITED NATIONS, Rome	fao.org	https://www.fao.org/3/ak832e/ak832e.pdf	https://scholar.google.com/scholar?cites=8685378039488572788&as_sdt=2005&sciodt=2007&hl=en	449	2024-07-09 11:44:40	PDF								11	0.69	6	2	16	… infection on the surface of the floral parts of plants and on sound developing fruit. This infection … loss of water and allow rotting fungi and bacteria to penetrate the produce, thus causing …	https://www.fao.org/3/ak832e/ak832e.pdf	https://scholar.google.com/scholar?q=related:dO2xT0-piHgJ:scholar.google.com/&scioq=sapodila+bacterial+infection&hl=en&as_sdt=2007
450	0	M Amiri Mazraie, K Izadpanah, M Taghavi, ...	New alternative hosts of 'Candidatus Phytoplasma australasia' strains in the warm climate of Hormozgan province, southern Iran	2023	Australasian Plant …	Springer	https://link.springer.com/article/10.1007/s13313-023-00946-4		450	2024-07-09 11:44:40		10.1007/s13313-023-00946-4							0	0	0	4	1	… leaf were observed in Convolvulus virgatus in and near infected pepper fields (Fig. 2ac). … leaf were observed in the infected tomato fields (Fig. 2j). In the infected sesame fields of Haji …		https://scholar.google.com/scholar?q=related:IrOFSfkUDiMJ:scholar.google.com/&scioq=sapodila+bacterial+infection&hl=en&as_sdt=2007
451	45	XT Trinh, NV Long, LT Van Anh, PT Nga, ...	A comprehensive review of natural compounds for wound healing: targeting bioactivity perspective	2022	International Journal of …	mdpi.com	https://www.mdpi.com/1422-0067/23/17/9573	https://scholar.google.com/scholar?cites=12014688296779950385&as_sdt=2005&sciodt=2007&hl=en	451	2024-07-09 11:44:40	HTML								45	22.5	9	5	2	… from when the wound becomes infected. Neutrophils can phagocytize and secrete proteases (elastase, cathepsin G, proteinase 3) that help destroy bacteria in the wound and deco …	https://www.mdpi.com/1422-0067/23/17/9573	https://scholar.google.com/scholar?q=related:MamccFm_vKYJ:scholar.google.com/&scioq=sapodila+bacterial+infection&hl=en&as_sdt=2007
452	4	AS Roy	Improper disposal of non-biodegradable chewing gum is one of the biggest threats to our ecology: A review	2021	Current World Environment	cwejournal.org	http://cwejournal.org/pdf/vol16no3/CWE_Vol16_No3_p_916-927.pdf	https://scholar.google.com/scholar?cites=11152914715286567097&as_sdt=2005&sciodt=2007&hl=en	452	2024-07-09 11:44:40	PDF								4	1.33	4	1	3	… Again, it has a high potential to trap bacteria inside. Therefore, … the coagulated sap of the sapodilla tree. They additionally … So, it can be a transmitter of infectious diseases if an infected …	http://cwejournal.org/pdf/vol16no3/CWE_Vol16_No3_p_916-927.pdf	https://scholar.google.com/scholar?q=related:ufjhxtccx5oJ:scholar.google.com/&scioq=sapodila+bacterial+infection&hl=en&as_sdt=2007
453	7	Y Li, F Beisson, M Pollard, J Ohlrogge	Compositions and methods for using acyltransferases for altering lipid production on the surface of plants	2009	US Patent App. 11/821,182	Google Patents	https://patents.google.com/patent/US20090163729A1/en	https://scholar.google.com/scholar?cites=17789931624203321474&as_sdt=2005&sciodt=2007&hl=en	453	2024-07-09 11:44:40									7	0.47	2	4	15	… comprising suberin, a waxy substance, for sealing the stem against water loss or invasion by insects, or infection by bacteria or fungal spores, and may provide insulation for the plant. …		https://scholar.google.com/scholar?q=related:goAgn46I4vYJ:scholar.google.com/&scioq=sapodila+bacterial+infection&hl=en&as_sdt=2007
454	23	J Ding, C Liu, P Huang, Y Zhang, X Hu, H Li, Y Liu, ...	Effects of thymol concentration on postharvest diseases and quality of blueberry fruit	2023	Food Chemistry	Elsevier	https://www.sciencedirect.com/science/article/pii/S0308814622021896	https://scholar.google.com/scholar?cites=5911096803809336855&as_sdt=2005&sciodt=2007&hl=en	454	2024-07-09 11:44:40									23	23	3	8	1	… by decreasing the counts of mesophilic aerobic bacteria, mold, and yeast, ultimately … the disease resistance of blueberry fruit infections in vivo using Aspergillus niger and during …		https://scholar.google.com/scholar?q=related:F54AiDlvCFIJ:scholar.google.com/&scioq=sapodila+bacterial+infection&hl=en&as_sdt=2007
455	8	S Manzoor, G Yasmin, N Raza, J Fernandez, R Atiq, ...	Synthesis of polyaniline coated magnesium and cobalt oxide nanoparticles through eco-friendly approach and their application as antifungal agents	2021	Polymers	mdpi.com	https://www.mdpi.com/2073-4360/13/16/2669	https://scholar.google.com/scholar?cites=13541884518036959385&as_sdt=2005&sciodt=2007&hl=en	455	2024-07-09 11:44:40	HTML								8	2.67	1	6	3	Plant-mediated synthesis of nanoparticles exhibits great potential to minimize the generation of chemical waste through the utilization of non-toxic precursors. In this research work, we …	https://www.mdpi.com/2073-4360/13/16/2669	https://scholar.google.com/scholar?q=related:mXD0njhw7rsJ:scholar.google.com/&scioq=sapodila+bacterial+infection&hl=en&as_sdt=2007
456	1	D Nyadanu	Evaluation of the efficacy of resistance screening methods used in the breeding of black pod disease resistant varieties in cacao	2008		ir.ucc.edu.gh	https://ir.ucc.edu.gh/xmlui/handle/123456789/1816	https://scholar.google.com/scholar?cites=13973318800199776741&as_sdt=2005&sciodt=2007&hl=en	456	2024-07-09 11:44:40									1	0.06	1	1	16	… infection was observed. Correlation between resistance of leaves and pods was positive and significant at both penetration and post-penetration stages of infection. … levels of infection of …	https://ir.ucc.edu.gh/xmlui/bitstream/handle/123456789/1816/NYADANU%202008.pdf?sequence=1&isAllowed=y	https://scholar.google.com/scholar?q=related:5fkxO2oz68EJ:scholar.google.com/&scioq=sapodila+bacterial+infection&hl=en&as_sdt=2007
457	7	TT Yamashita	Compositions for controlling plant parasitic nematodes	2017	US Patent 9,661,857	Google Patents	https://patents.google.com/patent/US9661857B2/en	https://scholar.google.com/scholar?cites=11611957904546354029&as_sdt=2005&sciodt=2007&hl=en	457	2024-07-09 11:44:40									7	1	7	1	7	… , the bacterial antagonist may be a nematophagous bacteria. In other embodiments, the microbial antagonist may be a parasitic bacteria, cry protein-forming bacteria, Rhizobacteria, …	https://patentimages.storage.googleapis.com/4a/29/da/10b75af4801904/US9661857.pdf	https://scholar.google.com/scholar?q=related:bVNG_zD2JaEJ:scholar.google.com/&scioq=sapodila+bacterial+infection&hl=en&as_sdt=2007
458	3	M Rai, AP Ingle	Goli nska, P. Biogenic Silver Nanoparticles: What We Know and What Do We Need to Know? Nanomaterials 2021, 11, 2901	2021		academia.edu	https://www.academia.edu/download/74557338/pdf.pdf	https://scholar.google.com/scholar?cites=11581404872991955175&as_sdt=2005&sciodt=2007&hl=en	458	2024-07-09 11:44:40	PDF								3	1	2	2	3	… Bacteria also have potential to synthesize metal … ability of infected macrophages, reducing infection without inducing the … The nanocomposite films increased the shelf life of sapodilla …	https://www.academia.edu/download/74557338/pdf.pdf	https://scholar.google.com/scholar?q=related:59ip_l5quaAJ:scholar.google.com/&scioq=sapodila+bacterial+infection&hl=en&as_sdt=2007
459	0	CB Wood, TJ Smalley, M Rieger, DE Radcliffe	GROWTH AND WATER STRESS RESISTANCE OF VIBURNUM PLICATUM VAR. TOMENTOSUM IN PINE BARK-AMENDED SOIL.	1993	HortScience	journals.ashs.org	https://journals.ashs.org/downloadpdf/view/journals/hortsci/28/5/article-p487c.pdf		459	2024-07-09 11:44:40									0	0	0	4	31	… pre-dawn xylem potential of sapodilla plants. Dark respiration … (TCSA), suckering, bacterial canker infection, and PTSL death … had significantly less bacterial canker infection than Lovell. …		https://scholar.google.com/scholar?q=related:HHjC-ImZ_LcJ:scholar.google.com/&scioq=sapodila+bacterial+infection&hl=en&as_sdt=2007
460	224	JA Duke	CRC handbook of alternative cash crops	1993		books.google.com	https://books.google.com/books?hl=en&lr=&id=-tg7R4hU8hkC&oi=fnd&pg=PA1&dq=sapodila+bacterial+infection&ots=3dEQMOSTIx&sig=YBiCcklqee1uOLNLs0HHtHDZykE	https://scholar.google.com/scholar?cites=5745482755622272780&as_sdt=2005&sciodt=2007&hl=en	460	2024-07-09 11:44:40	BOOK								224	7.23	224	1	31	… Also the bacterium Agrobacterium tumefaciens attacks the plant. Nematodes isolated from … The most destructive post harvest diseases are caused by Erwinia carotovora (Bacterial soft …		https://scholar.google.com/scholar?q=related:DH__FyAOvE8J:scholar.google.com/&scioq=sapodila+bacterial+infection&hl=en&as_sdt=2007
461	45	J Popović-Djordjević, C Quispe, R Giordo, ...	Natural products and synthetic analogues against HIV: A perspective to develop new potential anti-HIV drugs	2022	European journal of …	Elsevier	https://www.sciencedirect.com/science/article/pii/S0223523422001192	https://scholar.google.com/scholar?cites=16738747441670793712&as_sdt=2005&sciodt=2007&hl=en	461	2024-07-09 11:44:40									45	22.5	11	4	2	… worldwide were infected with HIV in 2020, of which 1.5 million became newly infected with … body fluids from infected people or by using infected materials (eg needles, syringes) [21]. …		https://scholar.google.com/scholar?q=related:8CnEzRz6S-gJ:scholar.google.com/&scioq=sapodila+bacterial+infection&hl=en&as_sdt=2007
462	87	N Myers	Biodiversity's genetic library	1997	Nature's services: Societal dependence on natural …	books.google.com	https://books.google.com/books?hl=en&lr=&id=QYJSziDfTjEC&oi=fnd&pg=PA255&dq=sapodila+bacterial+infection&ots=YivINUCYwo&sig=9xqXdD6ieTpIx6NEA-kfN0SKTQc	https://scholar.google.com/scholar?cites=1209913834522481823&as_sdt=2005&sciodt=2007&hl=en	462	2024-07-09 11:44:40									87	3.22	87	1	27	This chapter reviews the manifold contributions of biodiversity and its genetic resources to modern agriculture, medicine, and industry. It also looks at wild species as models for …		https://scholar.google.com/scholar?q=related:nxSL2zh6yhAJ:scholar.google.com/&scioq=sapodila+bacterial+infection&hl=en&as_sdt=2007
463	87	EFSA Panel on Biological Hazards (BIOHAZ)	Scientific Opinion on the risk posed by pathogens in food of non‐animal origin. Part 1 (outbreak data analysis and risk ranking of food/pathogen combinations)	2013	EFSA Journal	Wiley Online Library	https://efsa.onlinelibrary.wiley.com/doi/abs/10.2903/j.efsa.2013.3025	https://scholar.google.com/scholar?cites=10059084398717760889&as_sdt=2005&sciodt=2007&hl=en	463	2024-07-09 11:44:40		10.2903/j.efsa.2013.3025							87	7.91	87	1	11	… EFSA adopted a scientific opinion on the risk posed by STEC and other pathogenic bacteria in seeds and sprouted seeds on 20 October 2011. The current mandate intends to …	https://efsa.onlinelibrary.wiley.com/doi/pdf/10.2903/j.efsa.2013.3025	https://scholar.google.com/scholar?q=related:efU-H_cLmYsJ:scholar.google.com/&scioq=sapodila+bacterial+infection&hl=en&as_sdt=2007
464	1	A Florencia, SED Putra, YP Mukti	Chitosan from snapper fish scale waste (Lutjanus spp.) for edible coating	2022	IOP Conference Series: Earth …	iopscience.iop.org	https://iopscience.iop.org/article/10.1088/1755-1315/1036/1/012032/meta	https://scholar.google.com/scholar?cites=8736221375009964637&as_sdt=2005&sciodt=2007&hl=en	464	2024-07-09 11:44:40		10.1088/1755-1315/1036/1/012032							1	0.5	0	3	2	… food products because it has anti-bacterial activity [4] and can … and transpiration as well as infection from microbial spoilage. … anti-bacterial activity, are non-toxic, and are biodegradable. …	https://iopscience.iop.org/article/10.1088/1755-1315/1036/1/012032/pdf	https://scholar.google.com/scholar?q=related:XcKk2A1LPXkJ:scholar.google.com/&scioq=sapodila+bacterial+infection&hl=en&as_sdt=2007
465	11	GW Hambrick, Z Even-Paz	Cutaneous leishmaniasis encountered in Philadelphia	1966	JAMA	jamanetwork.com	https://jamanetwork.com/journals/jama/article-abstract/662436	https://scholar.google.com/scholar?cites=14010633850980010176&as_sdt=2005&sciodt=2007&hl=en	465	2024-07-09 11:44:40									11	0.19	6	2	58	… Eleven out of the 12 lesions seen in the three patients with L trópica infections occurred on the … American natives collecting the chicle (gum) or latex of sapodilla for the manufacture of …		https://scholar.google.com/scholar?q=related:wAi6hUHFb8IJ:scholar.google.com/&scioq=sapodila+bacterial+infection&hl=en&as_sdt=2007
466	4	OKM Yahaya, AF Omar	Spectroscopy of tropical fruits: sala mango and B10 carambola (Penerbit USM)	2017		books.google.com	https://books.google.com/books?hl=en&lr=&id=TEMxDwAAQBAJ&oi=fnd&pg=PT8&dq=sapodila+bacterial+infection&ots=EvRUwfjuiv&sig=5WS78Hjng4hoiNvLfOtT_3GUb08	https://scholar.google.com/scholar?cites=5579810164321173612&as_sdt=2005&sciodt=2007&hl=en	466	2024-07-09 11:44:40	BOOK								4	0.57	2	2	7	This research work plays an important role in transforming current conventional methodology in fruit quality definition and evaluation into scientific and technological objectives and …		https://scholar.google.com/scholar?q=related:bEB6Bsh3b00J:scholar.google.com/&scioq=sapodila+bacterial+infection&hl=en&as_sdt=2007
467	7	A El Khetabi, L El Ghadraoui, R Ouaabou, ...	Antifungal activities of aqueous extracts of Moroccan medicinal plants against monilinia spp. Agent of Brown rot disease	2023	Journal of Natural …	Elsevier	https://www.sciencedirect.com/science/article/pii/S2773078623000195	https://scholar.google.com/scholar?cites=735079497636034503&as_sdt=2005&sciodt=2007&hl=en	467	2024-07-09 11:44:40	HTML								7	7	2	4	1	… their contact with the plasma membranes of bacteria. For that reason, the antimicrobial action of the polyphenols can alter the bacterial plasma membrane structure by an accumulation …	https://www.sciencedirect.com/science/article/pii/S2773078623000195	https://scholar.google.com/scholar?q=related:x7dEkuiGMwoJ:scholar.google.com/&scioq=sapodila+bacterial+infection&hl=en&as_sdt=2007
468	3	J Topping, M Gibbons, J Haines, S Knellar, ...	Assessment and quantification of latex protein (LP) transfer from LP containing contact materials into food and drink products	2004	A03043 Report, FSA …	Citeseer	https://citeseerx.ist.psu.edu/document?repid=rep1&type=pdf&doi=ef0a2d27cadf2da0d54e528dfe15262301da1844	https://scholar.google.com/scholar?cites=12502248817576764435&as_sdt=2005&sciodt=2007&hl=en	468	2024-07-09 11:44:40	PDF								3	0.15	1	5	20	… is added to act as a preservative to minimise bacterial growth. This latex concentrate then forms … the Sapodilla tree (Achras Sapota) to use as a chewing gum. The sap from the sapodilla …	https://citeseerx.ist.psu.edu/document?repid=rep1&type=pdf&doi=ef0a2d27cadf2da0d54e528dfe15262301da1844	https://scholar.google.com/scholar?q=related:E-Q1UQ_pgK0J:scholar.google.com/&scioq=sapodila+bacterial+infection&hl=en&as_sdt=2007
469	0	KH SCHROEDER, ...	SCHMIDT, HG	1969	Tri-ology …	Division of Plant Industry, Florida …			469	2024-07-09 11:44:40	CITATION								0	0	0	2	55			https://scholar.google.com/scholar?q=related:sgl_UB60KRwJ:scholar.google.com/&scioq=sapodila+bacterial+infection&hl=en&as_sdt=2007
470	0	A Nawaz, S Hussain, M Shafique	Sajid Ali, Muhammad Akbar Anjum, Shaghef Ejaz, Mahmood Ul Hasan	2022	Shelf Life and Food Safety	books.google.com	https://books.google.com/books?hl=en&lr=&id=OjP-EAAAQBAJ&oi=fnd&pg=PA227&dq=sapodila+bacterial+infection&ots=-TUWyFc4ZN&sig=4e9Gbzyj7r21AtPhaSjFdtTZ3k8		470	2024-07-09 11:44:40									0	0	0	3	2	… animal or plant, is more prone to bacterial or fungal growth, whereas foods with … bacteria is less in fruits than by molds and yeasts, whereas vegetables are prone to spoilage by bacteria …		https://scholar.google.com/scholar?q=related:MohqOnHJzPgJ:scholar.google.com/&scioq=sapodila+bacterial+infection&hl=en&as_sdt=2007
471	5	BK Prajapati, RK Patil	Bio-efficacy of Trichoderma spp. and its liquid culture filtrate on mycelial growth and management of onion black mould rot (Aspergillus niger) in vitro and in vivo	2017	Indian Phytopathol	researchgate.net	https://www.researchgate.net/profile/Bindesh-Prajapati/publication/315342868_Studies_on_Effect_of_A_niger_on_Physiological_Weight_Loss_and_Biochemical_Changes_in_Black_Mould_Rot_Diseased_Onion/links/592d5699a6fdcc89e746dee2/Studies-on-Effect-of-A-niger-on-Physiological-Weight-Loss-and-Biochemical-Changes-in-Black-Mould-Rot-Diseased-Onion.pdf	https://scholar.google.com/scholar?cites=7029236911217489318&as_sdt=2005&sciodt=2007&hl=en	471	2024-07-09 11:44:40	PDF								5	0.71	3	2	7	… duration, many fungal and bacterial pathogens cause rotting of … infected fresh onion bulbs of cultivar Nasik red showing … niger up to 62.58 per cent in Sapodilla (Manilkara zapota L.) …	https://www.researchgate.net/profile/Bindesh-Prajapati/publication/315342868_Studies_on_Effect_of_A_niger_on_Physiological_Weight_Loss_and_Biochemical_Changes_in_Black_Mould_Rot_Diseased_Onion/links/592d5699a6fdcc89e746dee2/Studies-on-Effect-of-A-niger-on-Physiological-Weight-Loss-and-Biochemical-Changes-in-Black-Mould-Rot-Diseased-Onion.pdf	https://scholar.google.com/scholar?q=related:prUub7rdjGEJ:scholar.google.com/&scioq=sapodila+bacterial+infection&hl=en&as_sdt=2007
472	40	BB Desai, DK Salunkhe	Fruits and vegetables	1991	Foods of Plant Origin: Production, Technology …	Springer	https://link.springer.com/content/pdf/10.1007/978-1-4615-2039-9_4?pdf=chapter%20toc	https://scholar.google.com/scholar?cites=8871351971361824384&as_sdt=2005&sciodt=2007&hl=en	472	2024-07-09 11:44:40		10.1007/978-1-4615-2039-9_4							40	1.21	20	2	33	… observed in such fruits as banana, soursop, and sapodilla when grown below 12C. In contrast, … creates favorable conditions for fungal and bacterial diseases (eg, leaf spot of banana). …		https://scholar.google.com/scholar?q=related:gJ57kp1fHXsJ:scholar.google.com/&scioq=sapodila+bacterial+infection&hl=en&as_sdt=2007
473	1	L Dėnė, K Laužikė, D Juškevičienė, A Valiuškaitė, ...	Initial Physiological, Biochemical and Elemental Garlic (Allium sativum L.) Clove Responses to T. vulgaris and S. aromaticum Extract Application	2024	Horticulturae	mdpi.com	https://www.mdpi.com/2311-7524/10/1/99	https://scholar.google.com/scholar?cites=5039399269985620038&as_sdt=2005&sciodt=2007&hl=en	473	2024-07-09 11:44:40	HTML								1	1	0	5	1	… be used not only to prevent infections but also to protect seeds … seeds of different cultivars for bacterial leaf spot control, … DPPH antioxidant activity in sapodilla fruit during storage [44]. …	https://www.mdpi.com/2311-7524/10/1/99	https://scholar.google.com/scholar?q=related:RhDbqO-K70UJ:scholar.google.com/&scioq=sapodila+bacterial+infection&hl=en&as_sdt=2007
474	0	RH Parikh	SKILL GAP ANALYSIS IN LIFE SCIENCES SECTOR	2014	Pharmaceutical Sciences	nujps.com	https://www.nujps.com/wp-content/uploads/2022/02/volume-4.pdf		474	2024-07-09 11:44:40	PDF								0	0	0	1	10	… The Mayan Indians obtained gum from the sapodilla tree, a … maintain a sufficient antibacterial dose within the oral cavity. … MCG aids in curing fungal infection by continuously releasing …	https://www.nujps.com/wp-content/uploads/2022/02/volume-4.pdf	https://scholar.google.com/scholar?q=related:FJvtLYK4wFsJ:scholar.google.com/&scioq=sapodila+bacterial+infection&hl=en&as_sdt=2007
475	0	I Callejas	Emerging Techniques in Coastal Water Quality in the US and Belize: Remote Sensing and Metagenomics	2023		search.proquest.com	https://search.proquest.com/openview/3238c502f2c2d6c8bbc3b0bc86a70539/1?pq-origsite=gscholar&cbl=18750&diss=y		475	2024-07-09 11:44:40	BOOK								0	0	0	1	1	Water quality monitoring is essential for the wellbeing of humans, animals, and the environment. Monitoring coastal water quality is critical for the sustainable management and …	https://escholarship.org/content/qt1k83378k/qt1k83378k_noSplash_21c78a5133af477418ab0e7c364efd4f.pdf	https://scholar.google.com/scholar?q=related:q6KyvmCP77wJ:scholar.google.com/&scioq=sapodila+bacterial+infection&hl=en&as_sdt=2007
476	97	WC Kennard, HF Winters	Some fruits and nuts for the tropics	1960		books.google.com	https://books.google.com/books?hl=en&lr=&id=icGPsXW1nDcC&oi=fnd&pg=PA5&dq=sapodila+bacterial+infection&ots=94twaqPRE-&sig=fHVfqYFfa-3fIBWbmb6bvZhRgaM	https://scholar.google.com/scholar?cites=16649793753447226671&as_sdt=2005&sciodt=2007&hl=en	476	2024-07-09 11:44:40	BOOK								97	1.52	49	2	64	… Fungi and bacteria probably are responsible … sapodilla usually is propagated by seeds, which require 4 to 5 weeks to germinate. It also can be grafted or budded. Fruits of the sapodilla …	https://books.google.com/books?hl=en&lr=&id=icGPsXW1nDcC&oi=fnd&pg=PA5&dq=sapodila+bacterial+infection&ots=94twaqPRE-&sig=fHVfqYFfa-3fIBWbmb6bvZhRgaM	https://scholar.google.com/scholar?q=related:L129UTTzD-cJ:scholar.google.com/&scioq=sapodila+bacterial+infection&hl=en&as_sdt=2007
477	104	A Aman, NN Siddiqui, SAU Qader	Characterization and potential applications of high molecular weight dextran produced by Leuconostoc mesenteroides AA1	2012	Carbohydrate Polymers	Elsevier	https://www.sciencedirect.com/science/article/pii/S0144861711007788	https://scholar.google.com/scholar?cites=10635664134323309434&as_sdt=2005&sciodt=2007&hl=en	477	2024-07-09 11:44:40									104	8.67	35	3	12	… Screening of industrially important bacterial isolates capable of producing diversified type of dextran was the main objective of the current study. Eight bacterial strains belonging to …		https://scholar.google.com/scholar?q=related:egu0FC54mZMJ:scholar.google.com/&scioq=sapodila+bacterial+infection&hl=en&as_sdt=2007
478	62	MU Hasan, R Riaz, AU Malik, AS Khan, ...	Potential of Aloe vera gel coating for storage life extension and quality conservation of fruits and vegetables: An overview	2021	Journal of Food …	Wiley Online Library	https://onlinelibrary.wiley.com/doi/abs/10.1111/jfbc.13640	https://scholar.google.com/scholar?cites=11952361074639268134&as_sdt=2005&sciodt=2007&hl=en	478	2024-07-09 11:44:40		10.1111/jfbc.13640							62	20.67	12	5	3	… number of factors including unskilled labor, poor handling in the field, improper processing, storage, packaging, and transport as well as lack of control on microbial and fungal infections…		https://scholar.google.com/scholar?q=related:JmkUMRJR36UJ:scholar.google.com/&scioq=sapodila+bacterial+infection&hl=en&as_sdt=2007
479	8	C Sittigul, U Sardsud, V Sardsud, ...	Effects of fruit maturity at harvest on disease development in lychee during storage	1994	ACIAR …	researchgate.net	https://www.researchgate.net/profile/Greg-Johnson-6/publication/52004884_Johnson_GI_and_Highley_E_ed_1994_ACIAR_Proceedings_No_58_Development_of_Postharvest_Technology_for_Tropical_Tree_Fruits/links/09e414fa89a18c8f79000000/Johnson-GI-and-Highley-E-ed-1994-ACIAR-Proceedings-No-58-Development-of-Postharvest-Technology-for-Tropical-Tree-Fruits.pdf#page=10	https://scholar.google.com/scholar?cites=48271386121001321&as_sdt=2005&sciodt=2007&hl=en	479	2024-07-09 11:44:40	PDF								8	0.27	2	4	30	… Pestaloria sp., unknown with white and grey mycelium colony, bacteria and no growth. In … , carambola and sapodilla. Prweedings of the Postharvest Honicullure Workshop. Melboumc. …	https://www.researchgate.net/profile/Greg-Johnson-6/publication/52004884_Johnson_GI_and_Highley_E_ed_1994_ACIAR_Proceedings_No_58_Development_of_Postharvest_Technology_for_Tropical_Tree_Fruits/links/09e414fa89a18c8f79000000/Johnson-GI-and-Highley-E-ed-1994-ACIAR-Proceedings-No-58-Development-of-Postharvest-Technology-for-Tropical-Tree-Fruits.pdf#page=10	https://scholar.google.com/scholar?q=related:admO5pF-qwAJ:scholar.google.com/&scioq=sapodila+bacterial+infection&hl=en&as_sdt=2007
480	23	MM Wall, D Sivakumar, L Korsten	Rambutan (Nephelium lappaceum L.)	2011	… biology and technology of tropical and …	Elsevier	https://www.sciencedirect.com/science/article/pii/B9780857090904500159	https://scholar.google.com/scholar?cites=5497648428033835158&as_sdt=2005&sciodt=2007&hl=en	480	2024-07-09 11:44:40									23	1.77	8	3	13	… Postharvest disease control may be achieved by preventing infection, eradicating infection, … Biocontrol agents are commonly occurring nonpathogenic microbes such as fungi, bacteria …		https://scholar.google.com/scholar?q=related:lgDxFB6SS0wJ:scholar.google.com/&scioq=sapodila+bacterial+infection&hl=en&as_sdt=2007
481	6	J Golding, SP Singh	Advances in the use of irradiation for the market access of fresh horticultural produce	2020	Advances in postharvest management …	api.taylorfrancis.com	https://api.taylorfrancis.com/content/chapters/edit/download?identifierName=doi&identifierValue=10.1201/9781003047650-9&type=chapterpdf	https://scholar.google.com/scholar?cites=6999873599545143405&as_sdt=2005&sciodt=2007&hl=en	481	2024-07-09 11:44:40									6	1.5	3	2	4	… of human pathogenic bacteria that frequently contaminate the surface … Spore forming bacteria are generally the most resistant to … In general, effective control of established infections of …		https://scholar.google.com/scholar?q=related:bfCFrfOLJGEJ:scholar.google.com/&scioq=sapodila+bacterial+infection&hl=en&as_sdt=2007
482	0	KB Dhamak, SB Somwanshi, AN Khadse, VA Kashid, ...	MEDICATED CHEWI G GUM AS A OVEL DRUG DELIVERY SYSTEM-A		pharmacologyonline.silae.it		https://pharmacologyonline.silae.it/files/newsletter/2011/vol3/046.nikam.pdf		482	2024-07-09 11:44:40	PDF								0	0	0	5		… If the gum base is chicle from the sapodilla tree, this product … chewing gum in oral infections caused by bacteria or fungi … and pharyngeal infections. It can also be used for inhibition of …	https://pharmacologyonline.silae.it/files/newsletter/2011/vol3/046.nikam.pdf	https://scholar.google.com/scholar?q=related:nG9ICGlDkXEJ:scholar.google.com/&scioq=sapodila+bacterial+infection&hl=en&as_sdt=2007
483	0	Q Herrahmawati, R Yuniati, Y YASMAN	Dacini tribe's fruit fly species in Depok (Indonesia) with special reference to the abundance of orchard fly, Bactrocera dorsalis, for fruit pest controlling	2023	Biodiversitas Journal of …	smujo.id	https://smujo.id/biodiv/article/view/13950		483	2024-07-09 11:44:40									0	0	0	3	1	… To rear the fruit fly larvae, we purchased infected fruit from traditional fruit sellers around the … Fruit flies can continue to infest the fruit until it becomes rotten due to bacterial contamination…	https://smujo.id/biodiv/article/download/13950/6774	https://scholar.google.com/scholar?q=related:058eYLCe6-kJ:scholar.google.com/&scioq=sapodila+bacterial+infection&hl=en&as_sdt=2007
484	0	VK Nikam	MEDICATED CHEWING GUM AS A NOVEL DRUG DELIVERY SYSTEM-A		academia.edu		https://www.academia.edu/download/90408085/046.nikam.pdf		484	2024-07-09 11:44:40	PDF								0	0	0	1		… If the gum base is chicle from the sapodilla tree, this product … chewing gum in oral infections caused by bacteria or fungi … and pharyngeal infections. It can also be used for inhibition of …	https://www.academia.edu/download/90408085/046.nikam.pdf	https://scholar.google.com/scholar?q=related:QSRZaaXqcVwJ:scholar.google.com/&scioq=sapodila+bacterial+infection&hl=en&as_sdt=2007
485	9	D Twilley, S Rademan, N Lall	Are medicinal plants effective for skin cancer?	2018	Medicinal Plants for Holistic Health and Well …	Elsevier	https://www.sciencedirect.com/science/article/pii/B9780128124758000020	https://scholar.google.com/scholar?cites=17810514381973816983&as_sdt=2005&sciodt=2007&hl=en	485	2024-07-09 11:44:40									9	1.5	3	3	6	… Biological carcinogens involve the development of cancer in accordance with infection of a virus, bacteria, or parasite. Chronic infections with viruses such as the hepatitis B and C …		https://scholar.google.com/scholar?q=related:lwaJXHeoK_cJ:scholar.google.com/&scioq=sapodila+bacterial+infection&hl=en&as_sdt=2007
486	13	N Sasanelli	Olive nematodes and their control	2009	Integrated Management of Fruit Crops and Forest …	Springer	https://link.springer.com/content/pdf/10.1007/978-1-4020-9858-1.pdf#page=288	https://scholar.google.com/scholar?cites=5675042947477697783&as_sdt=2005&sciodt=2007&hl=en	486	2024-07-09 11:44:40		10.1007/978-1-4020-9858-1							13	0.87	13	1	15	… They damage plant by directly attacking roots and subsequently predisposing them to secondary infections by bacteria and fungi, causing replant and olive preplant problems, …		https://scholar.google.com/scholar?q=related:93R-OX7NwU4J:scholar.google.com/&scioq=sapodila+bacterial+infection&hl=en&as_sdt=2007
487	0	N Kumari, JN Sharma, D Singh	Evaluation of Antifungal Efficacy of Selected Microorganisms Against Apple Rot Pathogens	2018	International Journal of Economic …	ojs.pphouse.org	http://ojs.pphouse.org/index.php/IJEP/article/view/4574		487	2024-07-09 11:44:40									0	0	0	3	6	… susceptible fruit tissues and cause infection via entry through fruit’s … were tentatively grouped as fungi, bacteria and yeast. … Bacterial isolates were identified on the basis of Gram staining. …	http://ojs.pphouse.org/index.php/IJEP/article/download/4574/2031	https://scholar.google.com/scholar?q=related:73SOKnH4s_EJ:scholar.google.com/&scioq=sapodila+bacterial+infection&hl=en&as_sdt=2007
488	16	VA Tran, TT Thi Vo, MNT Nguyen, ...	Novel α‐Mangostin Derivatives from Mangosteen (Garcinia mangostana L.) Peel Extract with Antioxidant and Anticancer Potential	2021	Journal of …	Wiley Online Library	https://onlinelibrary.wiley.com/doi/abs/10.1155/2021/9985604	https://scholar.google.com/scholar?cites=7723170064093739109&as_sdt=2005&sciodt=2007&hl=en	488	2024-07-09 11:44:40		10.1155/2021/9985604							16	5.33	4	4	3	… compounds for in vitro bactericidal activity on Gram-positive bacteria (Figure 1). α-MG, ß-MG, and γ-MG can kill bacteria quickly and avoid the phenomenon of drug resistance (Figure 1(…	https://onlinelibrary.wiley.com/doi/pdf/10.1155/2021/9985604	https://scholar.google.com/scholar?q=related:Zfg8EkE2LmsJ:scholar.google.com/&scioq=sapodila+bacterial+infection&hl=en&as_sdt=2007
489	0	F Santoso, VA Rahmat	Safety and Quality Assurance of Tomato and Lettuce Using Aloe Vera Edible Coating	2012		repository.sgu.ac.id	http://repository.sgu.ac.id/2557/		489	2024-07-09 11:44:40									0	0	0	2	12	… and Escherichia coli are types of pathogenic bacteria that … The bacterial count on PAV samples was quite similar to the … The reduction of the growth of 17 bacteria by A. vera gel has been …	http://repository.sgu.ac.id/2557/1/SAFETY%20AND%20QUALITY%20ASSURANCE%20OF%20TOMATO%20USING%20ALOE%20VERA%20EDIBLE%20COATING.pdf	https://scholar.google.com/scholar?q=related:zhAU5NGnkgcJ:scholar.google.com/&scioq=sapodila+bacterial+infection&hl=en&as_sdt=2007
490	36	B Wróblewska, LH Markiewicz, AM Szyc, ...	Lactobacillus casei LcY decreases milk protein immunoreactivity of fermented buttermilk but also contains IgE-reactive proteins	2016	Food Research …	Elsevier	https://www.sciencedirect.com/science/article/pii/S0963996916300618	https://scholar.google.com/scholar?cites=3510091744073432662&as_sdt=2005&sciodt=2007&hl=en	490	2024-07-09 11:44:40									36	4.5	9	4	8	… reaction to bacterial cell wall and surface-layer proteins in the serum of patients infected with … In silico analyses of structural and allergenicity features of sapodilla (Manilkara zapota) …	https://www.researchgate.net/profile/Joanna-Fotschki/publication/296486424_Lactobacillus_casei_LcY_decreases_milk_protein_immunoreactivity_of_fermented_buttermilk_but_also_contains_IgE-reactive_proteins/links/5b7d2dd8a6fdcc5f8b5b42fe/Lactobacillus-casei-LcY-decreases-milk-protein-immunoreactivity-of-fermented-buttermilk-but-also-contains-IgE-reactive-proteins.pdf	https://scholar.google.com/scholar?q=related:Vj6HDthZtjAJ:scholar.google.com/&scioq=sapodila+bacterial+infection&hl=en&as_sdt=2007
491	34	RL Collett, M Marais, M Daneel, M Rashidifard, ...	Meloidogyne enterolobii, a threat to crop production with particular reference to sub-Saharan Africa: an extensive, critical and updated review	2021	Nematology	brill.com	https://brill.com/view/journals/nemy/23/3/article-p247_1.xml	https://scholar.google.com/scholar?cites=7682709393924526670&as_sdt=2005&sciodt=2007&hl=en	491	2024-07-09 11:44:40									34	11.33	7	5	3	… enterolobii infection was also found in roots of bell pepper (Capsicum annuum L.) and tomato from Brazil that are resistant to other species of the M. incognita group (Carneiro et al., …	https://www.researchgate.net/profile/Raymond-Collett/publication/349173365_Meloidogyne_enterolobii_a_threat_to_crop_production_with_particular_reference_to_sub-Saharan_Africa_An_extensive_critical_and_updated_review/links/637de5af2f4bca7fd084da39/Meloidogyne-enterolobii-a-threat-to-crop-production-with-particular-reference-to-sub-Saharan-Africa-An-extensive-critical-and-updated-review.pdf	https://scholar.google.com/scholar?q=related:TpJtMX13nmoJ:scholar.google.com/&scioq=sapodila+bacterial+infection&hl=en&as_sdt=2007
492	6	G Nagamma, G Vijayalakshmi, MT Sanjay, ...	A review on eco-friendly natural plant and animal products for plant diseases management	2019	Int J Curr Microbiol …	academia.edu	https://www.academia.edu/download/94337648/Gowdra_20Nagamma__20et_20al.pdf	https://scholar.google.com/scholar?cites=6015746814351009613&as_sdt=2005&sciodt=2007&hl=en	492	2024-07-09 11:44:40	PDF								6	1.2	2	4	5	… They are synthesized by plants in response to microbial infection and are often found effective in vitro as antimicrobial substance against a wide array of microorganisms. Tannins are …	https://www.academia.edu/download/94337648/Gowdra_20Nagamma__20et_20al.pdf	https://scholar.google.com/scholar?q=related:TWcU2No5fFMJ:scholar.google.com/&scioq=sapodila+bacterial+infection&hl=en&as_sdt=2007
493	15	JE Lozano	Chemical composition of fruits and its technological importance	2006	… Engineering Properties, and Deteriorative Reactions of …	Springer	https://link.springer.com/content/pdf/10.1007/978-0-387-30616-2_6.pdf	https://scholar.google.com/scholar?cites=7393237417647266399&as_sdt=2005&sciodt=2007&hl=en	493	2024-07-09 11:44:40		10.1007/978-0-387-30616-2_6							15	0.83	15	1	18	… These acids give fruits, tartness and slow down bacterial spoilage. Acidity and sugars are the main elements determining the taste of fruits, and sugar/acid ratio is very often used in …		https://scholar.google.com/scholar?q=related:X9r9okIOmmYJ:scholar.google.com/&scioq=sapodila+bacterial+infection&hl=en&as_sdt=2007
494	442	VM Dembitsky, S Poovarodom, H Leontowicz, ...	The multiple nutrition properties of some exotic fruits: Biological activity and active metabolites	2011	Food research …	Elsevier	https://www.sciencedirect.com/science/article/pii/S0963996911001608	https://scholar.google.com/scholar?cites=14110077383233388180&as_sdt=2005&sciodt=2007&hl=en	494	2024-07-09 11:44:40									442	34	111	4	13	The main objective of this review was to describe the physicochemical and nutritional characteristics of twenty selected exotic fruits and the influence of their physiologically active …	https://citeseerx.ist.psu.edu/document?repid=rep1&type=pdf&doi=494a3ed124236a48da8f0324064d42d4020fb942	https://scholar.google.com/scholar?q=related:lD7mJJ8Q0cMJ:scholar.google.com/&scioq=sapodila+bacterial+infection&hl=en&as_sdt=2007
495	0	EFSA Panel on Plant Health (PLH), C Bragard, ...	Pest categorisation of Diaprepes abbreviatus	2023	EFSA …	Wiley Online Library	https://efsa.onlinelibrary.wiley.com/doi/abs/10.2903/j.efsa.2023.8318		495	2024-07-09 11:44:40		10.2903/j.efsa.2023.8318							0	0	0	3	1	… abbreviatus, which also creates wounds when feeding, thus producing favourable infection sites for the pathogen (Kaiser and Vakili, 1978). This bacterium is a regulated non-QP (under …	https://efsa.onlinelibrary.wiley.com/doi/pdfdirect/10.2903/j.efsa.2023.8318	https://scholar.google.com/scholar?q=related:b0vmpXlsUx4J:scholar.google.com/&scioq=sapodila+bacterial+infection&hl=en&as_sdt=2007
496	6	L Guillén, C Pascacio-Villafán, I Osorio-Paz, ...	Coping with global warming: Adult thermal thresholds in four pestiferous Anastrepha species determined under experimental laboratory conditions and …	2022	Frontiers in …	frontiersin.org	https://www.frontiersin.org/articles/10.3389/fphys.2022.991923/full	https://scholar.google.com/scholar?cites=16639020421204270213&as_sdt=2005&sciodt=2007&hl=en	496	2024-07-09 11:44:40	HTML	10.3389/fphys.2022.991923							6	3	2	4	2	… In Apazapan, a mango and sapodilla producing area, the temperatures fluctuated between … immune system and render them more prone to infections by pathogenic bacteria and fungi. …	https://www.frontiersin.org/articles/10.3389/fphys.2022.991923/full	https://scholar.google.com/scholar?q=related:hdxZcOqs6eYJ:scholar.google.com/&scioq=sapodila+bacterial+infection&hl=en&as_sdt=2007
497	0	E Sandbeck	Green Barbarians: Live Bravely on Your Home Planet	2009		books.google.com	https://books.google.com/books?hl=en&lr=&id=pN2PxCR_-agC&oi=fnd&pg=PR11&dq=sapodila+bacterial+infection&ots=s0t7ozMC0n&sig=nK7eBQRa8grNlguh2UAiaCfxCRw		497	2024-07-09 11:44:40	BOOK								0	0	0	1	15	… , dirt, harmless invertebrates, and minor viral infections. This … of the bacteria—and strains what of it did not kill outbacteria … The Mayans chewed chicle, the sap of the sapodilla tree. …		https://scholar.google.com/scholar?q=related:VXWJjQ_QgQsJ:scholar.google.com/&scioq=sapodila+bacterial+infection&hl=en&as_sdt=2007
498	0	M Pourmadadi, R Holghoomi, R Maleki-baladi, ...	Copper nanoparticles from chemical, physical, and green synthesis to medicinal application: A Review	2024	Plant Nano Biology	Elsevier	https://www.sciencedirect.com/science/article/pii/S2773111124000135		498	2024-07-09 11:44:40	HTML								0	0	0	4	1	… range of malignancies and infections. The scientific community … Fungi may make more nanoparticles than bacteria owing to … Fungi generate nanoparticles better than bacteria. They are …	https://www.sciencedirect.com/science/article/pii/S2773111124000135	https://scholar.google.com/scholar?q=related:5lcAvmxjc0UJ:scholar.google.com/&scioq=sapodila+bacterial+infection&hl=en&as_sdt=2007
499	9	DA Agboola, OO Fawibe, OG Ogunyale, ...	Botanical and protein sweeteners	2014	Journal of Advanced …	core.ac.uk	https://core.ac.uk/download/pdf/201583674.pdf	https://scholar.google.com/scholar?cites=15712886549075978131&as_sdt=2005&sciodt=2007&hl=en	499	2024-07-09 11:44:40	PDF								9	0.9	2	4	10	… -product of bacterial growth in the mouth, and bacteria thrive on … concentrated sugars, can support bacterial growth. It takes … of the Sapotaceae family, relative of the Sapodilla (Manilkara …	https://core.ac.uk/download/pdf/201583674.pdf	https://scholar.google.com/scholar?q=related:k-ev4RBjD9oJ:scholar.google.com/&scioq=sapodila+bacterial+infection&hl=en&as_sdt=2007
500	0	R Rao	Conservation of Tropical Plant Genetic Resources: In Situ Approach Ramanatha Rao and Bhuwon Sthapit	2012	Conservation of Tropical Plant Species	books.google.com	https://books.google.com/books?hl=en&lr=&id=p9MKNopksAgC&oi=fnd&pg=PA3&dq=sapodila+bacterial+infection&ots=_bfYgS387E&sig=se0Xna9JZGyOddJgkyuCHCa702M		500	2024-07-09 11:44:40									0	0	0	1	12	1.1 Introduction We are all aware that the plant genetic resources (PGR) collections are assemblies of genotypes or populations representative of cultigens (landraces as well as …		https://scholar.google.com/scholar?q=related:TbKcj6tO6-0J:scholar.google.com/&scioq=sapodila+bacterial+infection&hl=en&as_sdt=2007
501	466	B Singh, JP Singh, A Kaur, N Singh	Phenolic compounds as beneficial phytochemicals in pomegranate (Punica granatum L.) peel: A review	2018	Food chemistry	Elsevier	https://www.sciencedirect.com/science/article/pii/S0308814618306538	https://scholar.google.com/scholar?cites=11154783416968121640&as_sdt=2005&sciodt=2007&hl=en	501	2024-07-09 11:44:40									466	77.67	117	4	6	… (DPPH) and 2,2′-azino-bis[3-ethylbenzothiazoline-6-sulphonic acid] (ABTS) scavenging activity of PoP among the peels of pomegranate, kinnow, mango, banana and sapodilla fruits. …		https://scholar.google.com/scholar?q=related:KI3NymrAzZoJ:scholar.google.com/&scioq=sapodila+bacterial+infection&hl=en&as_sdt=2007
502	2	A Bradford, R Brook, C Hunshal	4 WASTEWATER IRRIGATION: HUBLI-DHARWAD, INDIA	2003	… and Productive uses of water at the …	musgroup.net	https://www.musgroup.net/sites/default/files/phpoTrtwh.pdf	https://scholar.google.com/scholar?cites=4069394611110211367&as_sdt=2005&sciodt=2007&hl=en	502	2024-07-09 11:44:40	PDF								2	0.1	1	3	21	… fields are likely to increase bacterial contamination of the crop by providing additional entry routes. … The bacterium is a pathogen that can be used as a biological pest control against …	https://www.musgroup.net/sites/default/files/phpoTrtwh.pdf	https://scholar.google.com/scholar?q=related:J-8cltZkeTgJ:scholar.google.com/&scioq=sapodila+bacterial+infection&hl=en&as_sdt=2007
[truncated: 448 more rows]

## Sheet: Google Scholar 2
No	Cites	Authors	Title	Year	Source	Publisher	ArticleURL	CitesURL	GSRank	QueryDate	Type	DOI	ISSN	CitationURL	Volume	Issue	StartPage	EndPage	ECC	CitesPerYear	CitesPerAuthor	AuthorCount	Age	Abstract	FullTextURL	RelatedURL
[truncated: 704 more rows]

[truncated: 10 more sheets: Google Scholar 3, Pubmed 1, Pubmed 2, Pubmed 3, Pubmed 4, Science Direct 1, Science Direct 2, Science Direct 3, Science Direct 4, total]
